# Supplementary material for: Visual foundation models for fast, label-free detection of diffuse glioma infiltration
Source: Research Square preprint supplement (doi:10.21203/rs.3.rs-4033133/v1), 2024-03-12
Supplement: Supplementary file 1 [file 2c286f90015793e7d4c322f8.xlsx]

## Sheet: Sheet 1
Table 1
patient	mosaic	tumor_infiltration_label	idh_status	1p19q_status	molecular_diagnosis	who_grade	is_recurrent	race	sex	age	fastglioma_logits	foundation_logits
NIO_MUV_02	2	2	0	0	gbm	4	1	white	female	50	-3.41844	-3.52314
NIO_MUV_02	3	2	0	0	gbm	4	1	white	female	50	-2.94521	-3.97599
NIO_MUV_02	4	2	0	0	gbm	4	1	white	female	50	-0.580525	0.247278
NIO_MUV_02	5	1	0	0	gbm	4	1	white	female	50	-3.14865	-3.27012
NIO_MUV_02	7	1	0	0	gbm	4	1	white	female	50	-0.993721	-0.436976
NIO_MUV_04	1	0	1	0	astro	3	0	white	female	34	0.529622	-0.361052
NIO_MUV_04	2	2	1	0	astro	3	0	white	female	34	2.22945	0.74667
NIO_MUV_04	3	1	1	0	astro	3	0	white	female	34	1.28662	0.888645
NIO_MUV_04	4	3	1	0	astro	3	0	white	female	34	2.97941	3.98221
NIO_MUV_04	5	2	1	0	astro	3	0	white	female	34	-1.74436	-1.26982
NIO_MUV_04	6	0	1	0	astro	3	0	white	female	34	2.99782	4.06017
NIO_MUV_06	1	3	0	0	gbm	4	1	white	female	70	4.67775	2.47751
NIO_MUV_06	2	3	0	0	gbm	4	1	white	female	70	4.68527	2.89872
NIO_MUV_06	3	3	0	0	gbm	4	1	white	female	70	4.38329	1.92535
NIO_MUV_06	4	3	0	0	gbm	4	1	white	female	70	3.71933	2.27708
NIO_MUV_06	5	3	0	0	gbm	4	1	white	female	70	1.53252	-0.631036
NIO_MUV_08	1	3	1	0	gbm	4	1	white	female	27	5.29781	1.78869
NIO_MUV_08	2	3	1	0	gbm	4	1	white	female	27	4.95365	1.10413
NIO_MUV_08	3	3	1	0	gbm	4	1	white	female	27	5.65741	1.89298
NIO_MUV_08	4	2	1	0	gbm	4	1	white	female	27	-2.67343	-3.25376
NIO_MUV_08	5	2	1	0	gbm	4	1	white	female	27	-1.62825	-2.30153
NIO_MUV_08	6	3	1	0	gbm	4	1	white	female	27	3.57296	-0.152269
NIO_MUV_08	7	3	1	0	gbm	4	1	white	female	27	4.17582	3.36685
NIO_MUV_08	8	3	1	0	gbm	4	1	white	female	27	4.09739	3.62437
NIO_MUV_08	10	3	1	0	gbm	4	1	white	female	27	4.54448	3.87246
NIO_MUV_08	11	3	1	0	gbm	4	1	white	female	27	3.15801	2.40635
NIO_MUV_08	12	3	1	0	gbm	4	1	white	female	27	4.15041	3.25489
NIO_MUV_08	13	3	1	0	gbm	4	1	white	female	27	3.66103	4.43228
NIO_MUV_08	14	3	1	0	gbm	4	1	white	female	27	3.5252	4.43729
NIO_MUV_08	15	3	1	0	gbm	4	1	white	female	27	4.23321	4.35482
NIO_MUV_08	16	3	1	0	gbm	4	1	white	female	27	3.58396	4.1387
NIO_MUV_08	17	3	1	0	gbm	4	1	white	female	27	4.17259	3.68057
NIO_MUV_08	18	3	1	0	gbm	4	1	white	female	27	3.19723	2.67029
NIO_MUV_08	19	3	1	0	gbm	4	1	white	female	27	4.30514	4.02468
NIO_MUV_08	20	2	1	0	gbm	4	1	white	female	27	4.36086	4.29688
NIO_MUV_100	1	3	0	0	gbm	4	0	white	female	59	3.34629	1.56245
NIO_MUV_100	2	0	0	0	gbm	4	0	white	female	59	-0.0695496	-1.91766
NIO_MUV_100	3	3	0	0	gbm	4	0	white	female	59	3.61966	2.72139
NIO_MUV_100	4	3	0	0	gbm	4	0	white	female	59	2.44259	1.82038
NIO_MUV_100	5	3	0	0	gbm	4	0	white	female	59	1.9316	0.196946
NIO_MUV_100	6	2	0	0	gbm	4	0	white	female	59	3.03087	0.28044
NIO_MUV_100	7	3	0	0	gbm	4	0	white	female	59	2.97209	2.55951
NIO_MUV_100	8	3	0	0	gbm	4	0	white	female	59	2.44577	1.77843
NIO_MUV_100	9	3	0	0	gbm	4	0	white	female	59	3.25572	2.01727
NIO_MUV_100	10	2	0	0	gbm	4	0	white	female	59	0.601804	-0.231753
NIO_MUV_101	1	3	0	0	gbm	4	0	white	female	38	3.30479	3.1292
NIO_MUV_104	1	3	1	0	gbm	4	0	white	male	59	2.56654	1.08875
NIO_MUV_104	2	3	1	0	gbm	4	0	white	male	59	2.6301	1.9248
NIO_MUV_109	1	2	-1	0	astro	1	1	white	female	-1	2.63424	1.7998
NIO_MUV_119	1	2	0	0	gbm	4	0	white	female	-1	-1.73592	-3.05884
NIO_MUV_119	2	3	0	0	gbm	4	0	white	female	-1	3.97283	1.41983
NIO_MUV_124	1	3	1	1	oligo	3	0	white	male	-1	3.23679	2.30863
NIO_MUV_124	2	3	1	1	oligo	3	0	white	male	-1	3.20501	2.21942
NIO_MUV_124	3	3	1	1	oligo	3	0	white	male	-1	3.65057	2.27147
NIO_MUV_124	4	2	1	1	oligo	3	0	white	male	-1	0.0564046	-0.717978
NIO_MUV_124	5	3	1	1	oligo	3	0	white	male	-1	2.67935	1.60783
NIO_MUV_124	6	2	1	1	oligo	3	0	white	male	-1	-1.99817	-2.43959
NIO_MUV_124	7	3	1	1	oligo	3	0	white	male	-1	1.41973	1.46665
NIO_MUV_124	8	3	1	1	oligo	3	0	white	male	-1	4.20511	2.91191
NIO_MUV_125	1	1	0	0	gbm	4	0	white	female	-1	2.46903	0.373348
NIO_MUV_125	2	3	0	0	gbm	4	0	white	female	-1	3.42067	3.43315
NIO_MUV_132	1	3	1	1	oligo	3	0	white	male	-1	4.42482	3.87544
NIO_MUV_132	2	1	1	1	oligo	3	0	white	male	-1	-1.96157	-2.94683
NIO_MUV_132	3	1	1	1	oligo	3	0	white	male	-1	-1.63643	-2.56564
NIO_MUV_139	1	0	0	0	gbm	4	0	white	male	-1	-1.52949	-3.40915
NIO_MUV_139	2	3	0	0	gbm	4	0	white	male	-1	2.3662	0.623112
NIO_MUV_139	3	3	0	0	gbm	4	0	white	male	-1	0.331662	-0.575193
NIO_MUV_139	5	1	0	0	gbm	4	0	white	male	-1	-2.56378	-4.09683
NIO_MUV_139	7	3	0	0	gbm	4	0	white	male	-1	2.16054	1.49114
NIO_MUV_139	8	2	0	0	gbm	4	0	white	male	-1	-0.698471	-1.41413
NIO_MUV_139	10	0	0	0	gbm	4	0	white	male	-1	-2.30764	-3.33851
NIO_MUV_139	11	2	0	0	gbm	4	0	white	male	-1	-1.03901	-2.43182
NIO_MUV_139	12	1	0	0	gbm	4	0	white	male	-1	-1.3906	-2.13535
NIO_MUV_139	13	2	0	0	gbm	4	0	white	male	-1	-0.574884	0.0938446
NIO_MUV_148	1	3	0	0	astro	3	0	white	female	-1	1.04917	-0.496834
NIO_MUV_148	2	0	0	0	astro	3	0	white	female	-1	-4.25942	-4.80735
NIO_MUV_148	3	3	0	0	astro	3	0	white	female	-1	3.00956	0.373942
NIO_MUV_148	4	1	0	0	astro	3	0	white	female	-1	-3.00315	-3.84895
NIO_MUV_148	5	1	0	0	astro	3	0	white	female	-1	-2.86023	-3.33364
NIO_MUV_148	6	0	0	0	astro	3	0	white	female	-1	-3.07323	-4.09044
NIO_MUV_148	7	2	0	0	astro	3	0	white	female	-1	-2.15498	-3.03674
NIO_MUV_15	1	3	0	0	gbm	4	0	white	female	67	1.81436	1.3454
NIO_MUV_15	2	3	0	0	gbm	4	0	white	female	67	2.24442	0.272296
NIO_MUV_15	3	3	0	0	gbm	4	0	white	female	67	1.77349	3.21642
NIO_MUV_15	4	3	0	0	gbm	4	0	white	female	67	1.70558	3.13982
NIO_MUV_15	5	1	0	0	gbm	4	0	white	female	67	1.82212	1.38279
NIO_MUV_157	1	0	-1	0	gbm	4	1	white	female	-1	-1.05357	-1.32309
NIO_MUV_157	2	1	-1	0	gbm	4	1	white	female	-1	-0.477173	0.0745977
NIO_MUV_157	3	0	-1	0	gbm	4	1	white	female	-1	-1.11425	-1.07566
NIO_MUV_157	4	1	-1	0	gbm	4	1	white	female	-1	-0.499318	0.10485
NIO_MUV_157	5	2	-1	0	gbm	4	1	white	female	-1	-0.327547	0.189447
NIO_MUV_158	1	3	0	0	gbm	4	1	white	male	-1	2.80069	3.73578
NIO_MUV_158	2	2	0	0	gbm	4	1	white	male	-1	1.16848	0.444286
NIO_MUV_158	3	0	0	0	gbm	4	1	white	male	-1	-0.52591	-1.51495
NIO_MUV_158	4	0	0	0	gbm	4	1	white	male	-1	-0.419648	-1.57042
NIO_MUV_158	5	2	0	0	gbm	4	1	white	male	-1	1.55966	1.95463
NIO_MUV_158	6	2	0	0	gbm	4	1	white	male	-1	2.43448	2.21309
NIO_MUV_158	7	1	0	0	gbm	4	1	white	male	-1	-0.0318004	-0.473656
NIO_MUV_158	8	3	0	0	gbm	4	1	white	male	-1	2.49318	3.1987
NIO_MUV_163	1	1	1	0	astro	2	0	white	male	-1	2.26473	3.06116
NIO_MUV_165	1	1	1	1	oligo	3	0	white	male	-1	-0.26278	-1.80006
NIO_MUV_165	2	2	1	1	oligo	3	0	white	male	-1	1.33289	1.33139
NIO_MUV_167	1	1	0	0	gbm	4	0	white	male	-1	1.21989	0.826949
NIO_MUV_167	2	2	0	0	gbm	4	0	white	male	-1	1.54839	-0.286778
NIO_MUV_175	1	2	1	0	astro	3	0	white	male	-1	2.19058	2.52262
NIO_MUV_175	2	0	1	0	astro	3	0	white	male	-1	-2.45485	-2.5502
NIO_MUV_175	3	0	1	0	astro	3	0	white	male	-1	-2.44572	-2.29562
NIO_MUV_175	4	0	1	0	astro	3	0	white	male	-1	-1.10325	-0.711479
NIO_MUV_175	5	0	1	0	astro	3	0	white	male	-1	-1.04674	-0.895162
NIO_MUV_179	1	3	0	0	gbm	4	0	white	male	-1	1.81139	1.0034
NIO_MUV_18	1	2	0	0	gbm	4	1	white	male	47	0.183755	-0.554541
NIO_MUV_18	2	3	0	0	gbm	4	1	white	male	47	2.27953	0.86155
NIO_MUV_183	1	2	0	0	gbm	4	0	white	male	-1	1.46738	-0.866779
NIO_MUV_183	2	0	0	0	gbm	4	0	white	male	-1	-2.81416	-4.06649
NIO_MUV_183	3	1	0	0	gbm	4	0	white	male	-1	-0.725726	-0.736025
NIO_MUV_183	4	1	0	0	gbm	4	0	white	male	-1	-0.937787	-0.583708
NIO_MUV_183	5	1	0	0	gbm	4	0	white	male	-1	-0.564078	-1.00479
NIO_MUV_189	1	3	0	0	gbm	4	0	white	male	-1	2.37866	1.54688
NIO_MUV_189	2	3	0	0	gbm	4	0	white	male	-1	1.95258	0.652181
NIO_MUV_189	3	3	0	0	gbm	4	0	white	male	-1	2.09697	2.1863
NIO_MUV_197	1	3	1	0	gbm	4	0	white	female	-1	0.608143	-2.57586
NIO_MUV_197	2	2	1	0	gbm	4	0	white	female	-1	-1.83354	-2.98271
NIO_MUV_197	3	3	1	0	gbm	4	0	white	female	-1	2.6166	0.951022
NIO_MUV_197	4	1	1	0	gbm	4	0	white	female	-1	-2.82101	-2.74965
NIO_MUV_197	5	1	1	0	gbm	4	0	white	female	-1	-2.13721	-1.39388
NIO_MUV_197	6	0	1	0	gbm	4	0	white	female	-1	-2.12418	-2.89267
NIO_MUV_203	1	0	1	1	oligo	2	0	white	male	-1	-4.69876	-4.85109
NIO_MUV_203	2	0	1	1	oligo	2	0	white	male	-1	-3.41807	-2.27992
NIO_MUV_203	3	0	1	1	oligo	2	0	white	male	-1	-3.8758	-2.36877
NIO_MUV_205	1	3	0	0	gbm	4	0	white	male	-1	2.8519	0.341431
NIO_MUV_205	2	3	0	0	gbm	4	0	white	male	-1	4.32778	2.61204
NIO_MUV_208	1	3	0	0	gbm	4	0	white	male	-1	2.46673	2.09265
NIO_MUV_208	2	3	0	0	gbm	4	0	white	male	-1	3.08036	1.88586
NIO_MUV_208	3	3	0	0	gbm	4	0	white	male	-1	2.82721	1.75487
NIO_MUV_211	1	2	0	0	gbm	4	1	white	male	-1	0.175623	1.10663
NIO_MUV_211	2	3	0	0	gbm	4	1	white	male	-1	-0.127743	0.367433
NIO_MUV_211	3	2	0	0	gbm	4	1	white	male	-1	1.58464	1.3665
NIO_MUV_216	1	3	-1	0	astro	1	1	white	male	-1	1.31107	-0.0556947
NIO_MUV_218	1	3	-1	0	gbm	4	0	white	male	-1	2.8013	2.11322
NIO_MUV_218	2	3	-1	0	gbm	4	0	white	male	-1	2.9923	2.05784
NIO_MUV_218	3	3	-1	0	gbm	4	0	white	male	-1	3.05303	2.05416
NIO_MUV_218	5	1	-1	0	gbm	4	0	white	male	-1	-0.308465	-1.08433
NIO_MUV_218	6	0	-1	0	gbm	4	0	white	male	-1	-0.982754	-1.21765
NIO_MUV_218	7	0	-1	0	gbm	4	0	white	male	-1	-0.35874	-0.037093
NIO_MUV_218	8	0	-1	0	gbm	4	0	white	male	-1	-0.203556	0.204752
NIO_MUV_219	1	0	1	0	astro	2	0	white	male	-1	1.40388	1.92755
NIO_MUV_219	3	1	1	0	astro	2	0	white	male	-1	-1.52754	-0.765152
NIO_MUV_219	4	0	1	0	astro	2	0	white	male	-1	-2.39476	-2.58454
NIO_MUV_219	5	0	1	0	astro	2	0	white	male	-1	-2.65595	-3.52938
NIO_MUV_222	1	0	0	0	gbm	4	1	white	female	-1	-1.3163	-1.48408
NIO_MUV_222	2	3	0	0	gbm	4	1	white	female	-1	3.87519	4.51962
NIO_MUV_222	3	3	0	0	gbm	4	1	white	female	-1	1.76517	1.65928
NIO_MUV_222	4	2	0	0	gbm	4	1	white	female	-1	-2.96064	-3.53011
NIO_MUV_225	1	3	0	0	gbm	4	0	white	male	-1	2.37863	0.952368
NIO_MUV_225	3	1	0	0	gbm	4	0	white	male	-1	-2.19837	-1.84038
NIO_MUV_229	1	3	0	0	gbm	-1	0	white	female	-1	3.01658	0.828378
NIO_MUV_23	1	1	0	0	gbm	4	0	white	female	70	-0.889601	-0.994637
NIO_MUV_23	2	2	0	0	gbm	4	0	white	female	70	0.149748	-0.641108
NIO_MUV_23	3	1	0	0	gbm	4	0	white	female	70	-0.0903618	-0.342548
NIO_MUV_230	1	1	-1	-1	other	-1	-1	white	female	-1	-2.03399	-1.50677
NIO_MUV_230	2	2	-1	-1	other	-1	-1	white	female	-1	-1.74532	-1.48547
NIO_MUV_230	3	2	-1	-1	other	-1	-1	white	female	-1	-3.24485	-3.87893
NIO_MUV_233	1	3	0	0	gbm	4	0	white	female	-1	1.6675	-0.725952
NIO_MUV_234	1	1	0	-1	other	1	0	white	female	-1	0.522628	-1.00016
NIO_MUV_236	1	2	0	0	gbm	4	0	white	female	-1	-0.750834	-0.757463
NIO_MUV_237	1	3	1	0	astro	4	1	white	male	-1	2.09801	1.87855
NIO_MUV_241	1	0	1	0	astro	-1	-1	white	female	-1	-3.53374	-3.63279
NIO_MUV_241	2	0	1	0	astro	-1	-1	white	female	-1	-2.54382	-2.13319
NIO_MUV_241	3	0	1	0	astro	-1	-1	white	female	-1	-3.58495	-3.48417
NIO_MUV_246	1	3	1	1	oligo	2	1	white	male	-1	2.6154	0.908648
NIO_MUV_246	2	2	1	1	oligo	2	1	white	male	-1	2.1945	2.42598
NIO_MUV_246	3	2	1	1	oligo	2	1	white	male	-1	0.121306	0.381715
NIO_MUV_246	4	1	1	1	oligo	2	1	white	male	-1	-1.46184	-0.637391
NIO_MUV_246	5	2	1	1	oligo	2	1	white	male	-1	-0.466506	0.385816
NIO_MUV_253	1	3	0	0	gbm	4	0	white	female	-1	1.20427	1.67486
NIO_MUV_268	1	3	0	0	gbm	4	0	white	male	-1	3.57126	3.43454
NIO_MUV_27	1	1	0	0	gbm	4	0	white	male	75	2.27211	1.43659
NIO_MUV_27	2	3	0	0	gbm	4	0	white	male	75	2.18659	2.17877
NIO_MUV_27	3	3	0	0	gbm	4	0	white	male	75	1.44216	0.485623
NIO_MUV_271	1	0	0	0	gbm	4	0	white	female	-1	-3.25136	-4.32245
NIO_MUV_271	2	3	0	0	gbm	4	0	white	female	-1	2.83949	-1.02724
NIO_MUV_275	1	3	0	0	gbm	4	0	white	female	-1	2.74004	4.12713
NIO_MUV_278	1	3	0	0	gbm	4	1	white	male	-1	1.93559	0.781658
NIO_MUV_41	1	3	1	0	astro	3	1	white	male	43	1.94878	0.359854
NIO_MUV_41	2	2	1	0	astro	3	1	white	male	43	3.02128	2.57039
NIO_MUV_41	3	1	1	0	astro	3	1	white	male	43	2.5494	1.12889
NIO_MUV_41	4	3	1	0	astro	3	1	white	male	43	3.61717	2.81052
NIO_MUV_41	5	3	1	0	astro	3	1	white	male	43	3.66008	2.09715
NIO_MUV_41	6	1	1	0	astro	3	1	white	male	43	2.99942	2.62236
NIO_MUV_41	7	1	1	0	astro	3	1	white	male	43	2.5255	2.03867
NIO_MUV_41	8	1	1	0	astro	3	1	white	male	43	4.14061	2.63504
NIO_MUV_46	1	3	0	0	gbm	4	0	white	male	73	3.06919	1.34608
NIO_MUV_46	2	3	0	0	gbm	4	0	white	male	73	3.25497	2.43828
NIO_MUV_46	3	1	0	0	gbm	4	0	white	male	73	-1.52093	-2.99956
NIO_MUV_47	1	2	1	0	astro	2	1	white	male	25	1.94808	0.767854
NIO_MUV_47	2	2	1	0	astro	2	1	white	male	25	2.70536	0.817191
NIO_MUV_47	3	2	1	0	astro	2	1	white	male	25	1.58022	0.934394
NIO_MUV_54	1	1	0	0	gbm	4	0	white	male	78	-0.0379161	-0.479931
NIO_MUV_54	2	3	0	0	gbm	4	0	white	male	78	1.2673	-1.93804
NIO_MUV_59	1	2	0	0	gbm	4	1	white	male	56	1.33864	0.525689
NIO_MUV_59	2	0	0	0	gbm	4	1	white	male	56	0.39805	-0.565611
NIO_MUV_59	3	0	0	0	gbm	4	1	white	male	56	0.325241	-0.0307724
NIO_MUV_60	1	1	1	0	gbm	2	0	white	female	27	-0.801573	-0.0628253
NIO_MUV_60	2	1	1	0	gbm	2	0	white	female	27	-0.629935	-0.0479399
NIO_MUV_61	1	3	0	0	gbm	4	0	white	female	52	1.89408	1.83441
NIO_MUV_65	1	0	1	1	oligo	3	1	white	female	53	-1.1069	-1.24846
NIO_MUV_65	2	2	1	1	oligo	3	1	white	female	53	-0.938653	-1.5631
NIO_MUV_65	3	3	1	1	oligo	3	1	white	female	53	0.696687	-0.920892
NIO_MUV_65	4	3	1	1	oligo	3	1	white	female	53	0.974315	-0.861727
NIO_MUV_67	1	1	0	0	gbm	4	0	white	male	79	-0.763594	-1.23647
NIO_MUV_67	2	0	0	0	gbm	4	0	white	male	79	-1.67327	-1.18296
NIO_MUV_72	1	3	1	0	astro	2	0	white	female	23	1.38801	2.64467
NIO_MUV_74	1	3	0	0	gbm	4	0	white	male	42	0.791068	-1.05844
NIO_MUV_74	2	3	0	0	gbm	4	0	white	male	42	1.40597	-1.02395
NIO_MUV_74	3	3	0	0	gbm	4	0	white	male	42	1.66874	-0.369013
NIO_MUV_74	4	3	0	0	gbm	4	0	white	male	42	1.30759	-0.407407
NIO_MUV_75	1	3	0	0	gbm	4	0	white	male	72	1.73782	1.99397
NIO_MUV_75	2	3	0	0	gbm	4	0	white	male	72	1.63212	1.14331
NIO_MUV_75	3	3	0	0	gbm	4	0	white	male	72	2.31184	1.62596
NIO_MUV_75	4	0	0	0	gbm	4	0	white	male	72	0.353138	-1.26296
NIO_MUV_76	1	3	1	0	astro	3	0	white	female	26	1.68108	1.83698
NIO_MUV_78	1	2	0	0	gbm	4	0	white	male	56	0.38396	-0.932158
NIO_MUV_78	2	3	0	0	gbm	4	0	white	male	56	3.56051	3.6799
NIO_MUV_78	3	3	0	0	gbm	4	0	white	male	56	0.999735	1.74828
NIO_MUV_78	4	1	0	0	gbm	4	0	white	male	56	-0.84542	-1.61936
NIO_MUV_83	1	3	1	0	gbm	4	1	white	male	34	2.12399	0.271483
NIO_MUV_83	2	3	1	0	gbm	4	1	white	male	34	2.24377	0.411901
NIO_MUV_83	3	3	1	0	gbm	4	1	white	male	34	2.39351	-0.602174
NIO_MUV_83	4	3	1	0	gbm	4	1	white	male	34	2.70927	1.00445
NIO_MUV_85	1	3	0	0	gbm	4	1	white	male	51	1.41581	0.11726
NIO_MUV_86	1	3	0	0	gbm	4	0	white	male	68	2.54947	0.423511
NIO_MUV_99	1	3	0	0	gbm	4	0	white	female	49	2.95167	2.11804
NIO_NYU_106b	3	2	0	0	astro	2	0	-1	female	31	2.26536	2.73448
NIO_NYU_106b	4	2	0	0	astro	2	0	-1	female	31	2.23622	2.52646
NIO_NYU_106b	6	2	0	0	astro	2	0	-1	female	31	2.50723	2.32083
NIO_NYU_106b	7	2	0	0	astro	2	0	-1	female	31	2.41946	2.34179
NIO_NYU_106b	8	2	0	0	astro	2	0	-1	female	31	2.49572	1.98525
NIO_NYU_106b	9	2	0	0	astro	2	0	-1	female	31	2.45801	1.91543
NIO_NYU_106b	10	2	0	0	astro	2	0	-1	female	31	2.10619	2.18878
NIO_NYU_106b	11	2	0	0	astro	2	0	-1	female	31	2.15388	2.08217
NIO_NYU_106b	14	2	0	0	astro	2	0	-1	female	31	2.55843	1.16151
NIO_NYU_106b	15	2	0	0	astro	2	0	-1	female	31	2.372	0.748114
NIO_NYU_106b	16	2	0	0	astro	2	0	-1	female	31	2.32517	0.541778
NIO_NYU_106b	17	2	0	0	astro	2	0	-1	female	31	2.29658	0.780458
NIO_NYU_106b	18	2	0	0	astro	2	0	-1	female	31	2.46685	1.30715
NIO_NYU_106b	19	2	0	0	astro	2	0	-1	female	31	2.28171	-1.33423
NIO_NYU_106b	21	2	0	0	astro	2	0	-1	female	31	2.71836	1.66584
NIO_NYU_106b	22	2	0	0	astro	2	0	-1	female	31	2.65389	1.63613
NIO_NYU_106b	23	2	0	0	astro	2	0	-1	female	31	2.38871	1.70076
NIO_NYU_109	2	3	0	0	gbm	4	0	asian	female	46	-0.989637	-2.44928
NIO_NYU_109	3	3	0	0	gbm	4	0	asian	female	46	-1.24688	-3.12622
NIO_NYU_109	4	3	0	0	gbm	4	0	asian	female	46	-3.15358	-3.99087
NIO_NYU_109b	2	1	0	0	gbm	4	0	asian	female	46	0.0976758	-0.80346
NIO_NYU_109b	3	1	0	0	gbm	4	0	asian	female	46	0.407909	-0.699586
NIO_NYU_109b	4	3	0	0	gbm	4	0	asian	female	46	0.435246	-0.818606
NIO_NYU_109b	5	3	0	0	gbm	4	0	asian	female	46	0.622782	-0.644868
NIO_NYU_109b	6	3	0	0	gbm	4	0	asian	female	46	2.78665	0.174994
NIO_NYU_109b	7	3	0	0	gbm	4	0	asian	female	46	2.83253	0.00988718
NIO_NYU_109b	8	3	0	0	gbm	4	0	asian	female	46	2.98765	0.591334
NIO_NYU_109b	9	3	0	0	gbm	4	0	asian	female	46	-0.0434715	-1.16805
NIO_NYU_109b	10	3	0	0	gbm	4	0	asian	female	46	-0.223379	-1.32582
NIO_NYU_109b	11	3	0	0	gbm	4	0	asian	female	46	0.0990671	-1.2911
NIO_NYU_109b	13	1	0	0	gbm	4	0	asian	female	46	-0.793612	-1.36639
NIO_NYU_109b	14	2	0	0	gbm	4	0	asian	female	46	1.6458	-0.531383
NIO_NYU_109b	15	2	0	0	gbm	4	0	asian	female	46	2.50874	-0.13659
NIO_NYU_109b	16	1	0	0	gbm	4	0	asian	female	46	-3.79464	-3.53213
NIO_NYU_109b	17	1	0	0	gbm	4	0	asian	female	46	-1.13654	-2.92211
NIO_NYU_109b	18	3	0	0	gbm	4	0	asian	female	46	-0.542387	-1.229
NIO_NYU_109b	19	3	0	0	gbm	4	0	asian	female	46	1.22473	-0.20593
NIO_NYU_109b	20	1	0	0	gbm	4	0	asian	female	46	-3.00418	-3.42234
NIO_NYU_109b	21	0	0	0	gbm	4	0	asian	female	46	-1.13928	-2.45964
NIO_NYU_121	1	2	1	1	oligo	2	0	-1	female	21	1.13742	-0.0844392
NIO_NYU_121	2	2	1	1	oligo	2	0	-1	female	21	0.764946	-0.41646
NIO_NYU_121	3	2	1	1	oligo	2	0	-1	female	21	1.18786	0.129059
NIO_NYU_121	4	2	1	1	oligo	2	0	-1	female	21	-0.0461565	-1.91588
NIO_NYU_121	5	2	1	1	oligo	2	0	-1	female	21	-0.267201	-2.5238
NIO_NYU_121	6	2	1	1	oligo	2	0	-1	female	21	0.153607	-1.50251
NIO_NYU_121	7	2	1	1	oligo	2	0	-1	female	21	-0.212986	-1.88379
NIO_NYU_121	8	2	1	1	oligo	2	0	-1	female	21	-0.0789924	-1.48083
NIO_NYU_121	9	2	1	1	oligo	2	0	-1	female	21	-0.929568	-2.09496
NIO_NYU_121	10	0	1	1	oligo	2	0	-1	female	21	-3.43391	-4.3236
NIO_NYU_121	11	0	1	1	oligo	2	0	-1	female	21	-4.01319	-4.476
NIO_NYU_121	12	0	1	1	oligo	2	0	-1	female	21	-3.90705	-3.97791
NIO_NYU_121	13	0	1	1	oligo	2	0	-1	female	21	-3.7407	-4.05804
NIO_NYU_121	14	0	1	1	oligo	2	0	-1	female	21	-3.10572	-4.81532
NIO_NYU_121	15	0	1	1	oligo	2	0	-1	female	21	-3.21095	-4.6566
NIO_NYU_121	16	0	1	1	oligo	2	0	-1	female	21	-3.34805	-4.63352
NIO_NYU_121	17	0	1	1	oligo	2	0	-1	female	21	-3.21672	-4.32622
NIO_NYU_121	18	0	1	1	oligo	2	0	-1	female	21	-3.0306	-4.14937
NIO_NYU_121	19	0	1	1	oligo	2	0	-1	female	21	-4.24889	-4.48905
NIO_NYU_121	20	2	1	1	oligo	2	0	-1	female	21	-0.322511	-1.31252
NIO_NYU_121	21	2	1	1	oligo	2	0	-1	female	21	-1.22839	-2.5112
NIO_NYU_121	22	2	1	1	oligo	2	0	-1	female	21	-0.400357	-1.35352
NIO_NYU_129	2	0	1	1	oligo	2	0	-1	male	30	-2.64589	-3.72294
NIO_NYU_129	3	0	1	1	oligo	2	0	-1	male	30	-2.50432	-4.14778
NIO_NYU_129	4	0	1	1	oligo	2	0	-1	male	30	-3.22748	-4.38644
NIO_NYU_129	5	0	1	1	oligo	2	0	-1	male	30	-2.50238	-4.08477
NIO_NYU_129	6	0	1	1	oligo	2	0	-1	male	30	-2.26695	-3.99994
NIO_NYU_129	7	3	1	1	oligo	2	0	-1	male	30	1.43625	-2.05328
NIO_NYU_129	8	3	1	1	oligo	2	0	-1	male	30	1.79995	-0.218813
NIO_NYU_129	9	3	1	1	oligo	2	0	-1	male	30	0.551036	-2.94315
NIO_NYU_129	10	3	1	1	oligo	2	0	-1	male	30	2.87546	0.783782
NIO_NYU_129	11	3	1	1	oligo	2	0	-1	male	30	2.68112	0.76031
NIO_NYU_129	12	3	1	1	oligo	2	0	-1	male	30	0.86916	-2.76384
NIO_NYU_129	13	3	1	1	oligo	2	0	-1	male	30	0.50503	-3.48229
NIO_NYU_129	14	3	1	1	oligo	2	0	-1	male	30	1.85189	-0.55463
NIO_NYU_129	15	3	1	1	oligo	2	0	-1	male	30	0.905534	-2.83312
NIO_NYU_129	16	1	1	1	oligo	2	0	-1	male	30	-2.15303	-3.89051
NIO_NYU_129	17	1	1	1	oligo	2	0	-1	male	30	-0.989161	-3.73132
NIO_NYU_129	18	0	1	1	oligo	2	0	-1	male	30	-2.39373	-3.12835
NIO_NYU_129	19	0	1	1	oligo	2	0	-1	male	30	-1.69929	-3.48674
NIO_NYU_129	20	0	1	1	oligo	2	0	-1	male	30	-1.10646	-3.43037
NIO_NYU_129	21	0	1	1	oligo	2	0	-1	male	30	-3.72254	-4.63532
NIO_NYU_129	22	0	1	1	oligo	2	0	-1	male	30	-3.34031	-4.62714
NIO_NYU_129	23	1	1	1	oligo	2	0	-1	male	30	-2.02446	-4.26523
NIO_NYU_138	1	0	1	1	oligo	2	0	-1	female	34	0.16859	-1.77353
NIO_NYU_138	2	0	1	1	oligo	2	0	-1	female	34	0.998094	-0.262429
NIO_NYU_138	3	0	1	1	oligo	2	0	-1	female	34	-1.65395	-2.84849
NIO_NYU_138	4	0	1	1	oligo	2	0	-1	female	34	-0.98382	-2.80132
NIO_NYU_138	5	0	1	1	oligo	2	0	-1	female	34	-1.51877	-3.22798
NIO_NYU_138	6	0	1	1	oligo	2	0	-1	female	34	-2.7964	-3.49044
NIO_NYU_138	7	0	1	1	oligo	2	0	-1	female	34	-4.40862	-4.55536
NIO_NYU_138	8	0	1	1	oligo	2	0	-1	female	34	-3.44214	-4.69261
NIO_NYU_138	9	0	1	1	oligo	2	0	-1	female	34	-2.70143	-4.29575
NIO_NYU_138	10	0	1	1	oligo	2	0	-1	female	34	-4.59932	-4.79629
NIO_NYU_138	11	0	1	1	oligo	2	0	-1	female	34	-3.16778	-4.2679
NIO_NYU_138	12	0	1	1	oligo	2	0	-1	female	34	-2.7166	-4.56743
NIO_NYU_138	13	0	1	1	oligo	2	0	-1	female	34	-3.81849	-3.566
NIO_NYU_292a	2	0	1	1	oligo	-1	0	other	female	30	-2.85917	-2.73565
NIO_NYU_292a	3	0	1	1	oligo	-1	0	other	female	30	-1.81777	-1.86677
NIO_NYU_292a	4	2	1	1	oligo	-1	0	other	female	30	-2.62715	-3.34453
NIO_NYU_292a	5	2	1	1	oligo	-1	0	other	female	30	0.832064	-0.338172
NIO_NYU_292b	2	0	1	1	oligo	-1	0	other	female	30	-0.661233	-2.08309
NIO_NYU_292b	3	1	1	1	oligo	-1	0	other	female	30	-1.37377	-2.93147
NIO_NYU_292b	4	0	1	1	oligo	-1	0	other	female	30	3.97911	2.98696
NIO_NYU_292b	5	2	1	1	oligo	-1	0	other	female	30	3.64976	1.93697
NIO_NYU_292b	6	2	1	1	oligo	-1	0	other	female	30	3.03669	1.54347
NIO_NYU_292b	7	2	1	1	oligo	-1	0	other	female	30	1.7541	0.802791
NIO_NYU_292b	8	2	1	1	oligo	-1	0	other	female	30	3.25662	1.36065
NIO_NYU_292b	9	2	1	1	oligo	-1	0	other	female	30	2.8499	1.04842
NIO_NYU_292b	10	2	1	1	oligo	-1	0	other	female	30	3.26209	1.2289
NIO_NYU_292b	11	2	1	1	oligo	-1	0	other	female	30	3.20556	1.35746
NIO_NYU_292b	12	0	1	1	oligo	-1	0	other	female	30	-2.9213	-3.34441
NIO_NYU_292b	13	0	1	1	oligo	-1	0	other	female	30	-2.87056	-3.42457
NIO_NYU_292b	14	0	1	1	oligo	-1	0	other	female	30	-2.58345	-3.30368
NIO_NYU_292b	15	1	1	1	oligo	-1	0	other	female	30	-2.54924	-3.18321
NIO_NYU_292b	16	0	1	1	oligo	-1	0	other	female	30	-1.31632	-1.7354
NIO_NYU_349a	1	3	1	0	astro	-1	0	other	male	45	2.12517	-0.183011
NIO_NYU_349a	2	3	1	0	astro	-1	0	other	male	45	2.38883	-0.169966
NIO_NYU_349a	3	3	1	0	astro	-1	0	other	male	45	3.12043	0.85907
NIO_NYU_349a	4	3	1	0	astro	-1	0	other	male	45	1.73832	-0.602221
NIO_NYU_349a	5	3	1	0	astro	-1	0	other	male	45	3.02235	0.556893
NIO_NYU_349a	6	3	1	0	astro	-1	0	other	male	45	2.40366	0.448682
NIO_NYU_349b	1	2	1	0	astro	-1	0	other	male	45	-0.536684	-1.34845
NIO_NYU_349b	2	2	1	0	astro	-1	0	other	male	45	0.772359	0.280388
NIO_NYU_349b	3	2	1	0	astro	-1	0	other	male	45	-0.296112	0.09106
NIO_NYU_349b	4	2	1	0	astro	-1	0	other	male	45	-0.0952334	-0.433752
NIO_NYU_349b	5	2	1	0	astro	-1	0	other	male	45	-2.17272	-2.03687
NIO_NYU_349b	6	2	1	0	astro	-1	0	other	male	45	-0.109512	0.0596619
NIO_NYU_349c	1	3	1	0	astro	-1	0	other	male	45	3.06032	-0.547025
NIO_NYU_349c	2	2	1	0	astro	-1	0	other	male	45	-0.839528	-1.03067
NIO_NYU_349c	3	2	1	0	astro	-1	0	other	male	45	-1.41571	-2.11873
NIO_NYU_349c	4	2	1	0	astro	-1	0	other	male	45	-0.714927	-1.25839
NIO_NYU_349c	5	3	1	0	astro	-1	0	other	male	45	1.74403	-0.547472
NIO_NYU_349c	6	3	1	0	astro	-1	0	other	male	45	1.66182	-0.599457
NIO_NYU_349c	7	3	1	0	astro	-1	0	other	male	45	1.42725	-0.565115
NIO_NYU_349c	8	3	1	0	astro	-1	0	other	male	45	1.48443	-0.568766
NIO_NYU_447a	1	0	-1	1	oligo	-1	0	-1	male	47	-2.17022	-2.53976
NIO_NYU_447a	2	0	-1	1	oligo	-1	0	-1	male	47	-3.64892	-3.69512
NIO_NYU_447a	3	0	-1	1	oligo	-1	0	-1	male	47	-3.76298	-3.50027
NIO_NYU_447a	4	0	-1	1	oligo	-1	0	-1	male	47	-3.58896	-3.12812
NIO_NYU_447b	1	0	-1	1	oligo	-1	0	-1	male	47	-0.461975	0.197754
NIO_NYU_447b	2	0	-1	1	oligo	-1	0	-1	male	47	-0.548785	-0.00423751
NIO_NYU_447b	3	0	-1	1	oligo	-1	0	-1	male	47	-2.32935	-3.16206
NIO_NYU_447b	4	0	-1	1	oligo	-1	0	-1	male	47	-1.05454	-1.39241
NIO_NYU_447b	5	0	-1	1	oligo	-1	0	-1	male	47	-0.69796	-1.07728
NIO_NYU_447b	6	0	-1	1	oligo	-1	0	-1	male	47	-3.05445	-3.40162
NIO_NYU_447b	7	0	-1	1	oligo	-1	0	-1	male	47	-3.05085	-3.19561
NIO_NYU_447b	8	0	-1	1	oligo	-1	0	-1	male	47	-2.05999	-4.05347
NIO_NYU_447b	9	0	-1	1	oligo	-1	0	-1	male	47	-3.05703	-2.886
NIO_NYU_447b	10	1	-1	1	oligo	-1	0	-1	male	47	-2.80247	-2.82685
NIO_NYU_447b	11	1	-1	1	oligo	-1	0	-1	male	47	-0.980823	-1.76965
NIO_NYU_447b	12	0	-1	1	oligo	-1	0	-1	male	47	-3.48015	-3.09909
NIO_NYU_447b	13	0	-1	1	oligo	-1	0	-1	male	47	-3.23143	-3.60347
NIO_NYU_447c	1	0	-1	1	oligo	-1	0	-1	male	47	-1.71718	-1.5556
NIO_NYU_447c	2	0	-1	1	oligo	-1	0	-1	male	47	-3.24185	-3.1197
NIO_NYU_541	1	2	-1	1	oligo	2	0	-1	female	38	1.75343	-0.212402
NIO_NYU_541	2	2	-1	1	oligo	2	0	-1	female	38	1.42574	0.125453
NIO_NYU_541	4	2	-1	1	oligo	2	0	-1	female	38	2.66316	1.31207
NIO_NYU_541	5	2	-1	1	oligo	2	0	-1	female	38	2.30579	0.882468
NIO_NYU_541	6	0	-1	1	oligo	2	0	-1	female	38	-3.33538	-4.05014
NIO_NYU_541	7	0	-1	1	oligo	2	0	-1	female	38	-0.228227	-0.136938
NIO_NYU_541	8	0	-1	1	oligo	2	0	-1	female	38	-2.75943	-4.47666
NIO_NYU_541	9	0	-1	1	oligo	2	0	-1	female	38	-1.40115	-2.27318
NIO_NYU_541	10	0	-1	1	oligo	2	0	-1	female	38	-1.84502	-1.76944
NIO_NYU_541	11	1	-1	1	oligo	2	0	-1	female	38	-0.622506	-1.29208
NIO_NYU_541	12	0	-1	1	oligo	2	0	-1	female	38	-2.12193	-2.4259
NIO_NYU_541	13	0	-1	1	oligo	2	0	-1	female	38	-1.84005	-2.05357
NIO_NYU_541	14	0	-1	1	oligo	2	0	-1	female	38	-1.06898	-1.7138
NIO_NYU_541	15	0	-1	1	oligo	2	0	-1	female	38	-3.74733	-4.83853
NIO_NYU_554	1	0	1	0	astro	3	0	other	male	34	-2.69016	-3.13153
NIO_NYU_554	2	0	1	0	astro	3	0	other	male	34	-3.51377	-3.4051
NIO_NYU_554	3	0	1	0	astro	3	0	other	male	34	-4.87136	-4.82281
NIO_NYU_554	4	0	1	0	astro	3	0	other	male	34	-5.21621	-5.00299
NIO_NYU_554	5	0	1	0	astro	3	0	other	male	34	-4.36278	-4.8538
NIO_NYU_559a	8	2	1	0	astro	2	0	-1	male	43	-1.1701	-1.44026
NIO_NYU_559b	1	2	1	0	astro	2	0	-1	male	43	1.07726	0.114853
NIO_NYU_559b	2	2	1	0	astro	2	0	-1	male	43	-0.266678	-0.121919
NIO_NYU_559b	3	2	1	0	astro	2	0	-1	male	43	-1.76828	-1.25445
NIO_NYU_559b	4	2	1	0	astro	2	0	-1	male	43	-2.03882	-1.58982
NIO_NYU_559b	5	2	1	0	astro	2	0	-1	male	43	1.45759	1.21358
NIO_NYU_559b	6	0	1	0	astro	2	0	-1	male	43	-5.92069	-4.82535
NIO_NYU_559b	7	0	1	0	astro	2	0	-1	male	43	-5.11596	-4.99897
NIO_NYU_601	1	0	0	-1	other	-1	0	-1	male	40	-3.05163	-4.32979
NIO_NYU_601	2	0	0	-1	other	-1	0	-1	male	40	-3.98922	-4.63366
NIO_NYU_601	3	0	0	-1	other	-1	0	-1	male	40	-3.28547	-4.2852
NIO_NYU_601	4	0	0	-1	other	-1	0	-1	male	40	-3.39256	-4.49212
NIO_NYU_601	5	0	0	-1	other	-1	0	-1	male	40	-3.64528	-4.71546
NIO_NYU_601	6	0	0	-1	other	-1	0	-1	male	40	-3.66033	-4.7881
NIO_NYU_601	7	0	0	-1	other	-1	0	-1	male	40	-3.26551	-4.73231
NIO_NYU_601	8	0	0	-1	other	-1	0	-1	male	40	-3.44758	-4.77638
NIO_NYU_601	9	0	0	-1	other	-1	0	-1	male	40	-3.46747	-4.55661
NIO_NYU_601	10	0	0	-1	other	-1	0	-1	male	40	-3.67637	-4.60201
NIO_NYU_601b	1	0	0	-1	other	-1	0	-1	male	40	-2.4023	-2.12734
NIO_NYU_601b	2	0	0	-1	other	-1	0	-1	male	40	-2.10891	-2.56182
NIO_NYU_601b	3	0	0	-1	other	-1	0	-1	male	40	-1.98997	-2.91527
NIO_NYU_601b	4	0	0	-1	other	-1	0	-1	male	40	-1.96843	-3.42857
NIO_NYU_601b	5	0	0	-1	other	-1	0	-1	male	40	-5.4363	-5.19012
NIO_NYU_601b	6	0	0	-1	other	-1	0	-1	male	40	-4.09283	-4.28127
NIO_NYU_601b	7	0	0	-1	other	-1	0	-1	male	40	-2.90453	-4.27807
NIO_NYU_601b	8	0	0	-1	other	-1	0	-1	male	40	-1.37168	-3.097
NIO_NYU_601b	9	0	0	-1	other	-1	0	-1	male	40	-3.09207	-4.16105
NIO_NYU_601b	10	0	0	-1	other	-1	0	-1	male	40	-4.28039	-4.8821
NIO_NYU_601b	11	0	0	-1	other	-1	0	-1	male	40	-2.42812	-3.73235
NIO_NYU_674	1	2	0	-1	other	2	0	-1	male	63	2.91199	2.43744
NIO_NYU_674	2	2	0	-1	other	2	0	-1	male	63	3.10942	1.8307
NIO_NYU_674	3	2	0	-1	other	2	0	-1	male	63	-2.97113	-3.71273
NIO_NYU_674	4	0	0	-1	other	2	0	-1	male	63	-3.04359	-3.74363
NIO_NYU_674	5	0	0	-1	other	2	0	-1	male	63	-3.24002	-3.7779
NIO_NYU_674	6	0	0	-1	other	2	0	-1	male	63	-3.97316	-3.5599
NIO_NYU_674	7	0	0	-1	other	2	0	-1	male	63	-4.19363	-4.55072
NIO_NYU_674	8	0	0	-1	other	2	0	-1	male	63	-3.07803	-4.64112
NIO_NYU_674	9	0	0	-1	other	2	0	-1	male	63	-2.88655	-4.03609
NIO_NYU_674	10	2	0	-1	other	2	0	-1	male	63	2.4824	1.86573
NIO_NYU_674	11	2	0	-1	other	2	0	-1	male	63	3.57291	3.00685
NIO_NYU_676	1	2	1	1	oligo	2	0	-1	female	41	2.0348	0.43184
NIO_NYU_676	2	2	1	1	oligo	2	0	-1	female	41	2.07609	0.160987
NIO_NYU_676	3	2	1	1	oligo	2	0	-1	female	41	2.08632	1.23017
NIO_NYU_676	4	2	1	1	oligo	2	0	-1	female	41	2.12896	1.26512
NIO_NYU_676	5	0	1	1	oligo	2	0	-1	female	41	-3.37504	-3.38428
NIO_NYU_676	6	0	1	1	oligo	2	0	-1	female	41	-3.43635	-3.19388
NIO_NYU_676	7	0	1	1	oligo	2	0	-1	female	41	-3.22349	-3.18625
NIO_NYU_676	8	0	1	1	oligo	2	0	-1	female	41	-2.12732	-2.23504
NIO_NYU_676	9	0	1	1	oligo	2	0	-1	female	41	-3.56353	-3.86425
NIO_NYU_676	10	0	1	1	oligo	2	0	-1	female	41	-2.64824	-3.25942
NIO_NYU_676	11	0	1	1	oligo	2	0	-1	female	41	-3.48231	-3.88597
NIO_NYU_676	12	0	1	1	oligo	2	0	-1	female	41	-1.70209	-2.82418
NIO_NYU_676	13	0	1	1	oligo	2	0	-1	female	41	-2.13515	-3.09427
NIO_NYU_676	14	0	1	1	oligo	2	0	-1	female	41	-3.95521	-4.03968
NIO_NYU_676	15	2	1	1	oligo	2	0	-1	female	41	2.70936	1.78349
NIO_NYU_710	1	3	1	0	astro	4	0	unknown	male	30	2.98629	2.4311
NIO_NYU_710	2	3	1	0	astro	4	0	unknown	male	30	2.91551	1.88562
NIO_NYU_710	3	3	1	0	astro	4	0	unknown	male	30	2.68008	1.74424
NIO_NYU_710	4	3	1	0	astro	4	0	unknown	male	30	2.86052	1.99578
NIO_NYU_710	5	3	1	0	astro	4	0	unknown	male	30	2.89918	2.35059
NIO_NYU_710	6	3	1	0	astro	4	0	unknown	male	30	2.94561	2.60888
NIO_NYU_710	7	3	1	0	astro	4	0	unknown	male	30	3.21422	2.49051
NIO_NYU_710	8	3	1	0	astro	4	0	unknown	male	30	2.84431	1.31859
NIO_NYU_710	9	3	1	0	astro	4	0	unknown	male	30	4.13614	2.93123
NIO_NYU_710	10	3	1	0	astro	4	0	unknown	male	30	3.38131	2.07007
NIO_NYU_710	11	3	1	0	astro	4	0	unknown	male	30	2.4192	1.54186
NIO_NYU_710	12	3	1	0	astro	4	0	unknown	male	30	3.0979	1.5718
NIO_NYU_710	13	3	1	0	astro	4	0	unknown	male	30	3.19129	1.59112
NIO_NYU_710	14	3	1	0	astro	4	0	unknown	male	30	3.12093	1.38552
NIO_NYU_710	15	3	1	0	astro	4	0	unknown	male	30	3.06739	1.31612
NIO_NYU_710	16	3	1	0	astro	4	0	unknown	male	30	2.7317	1.04209
NIO_NYU_710	17	3	1	0	astro	4	0	unknown	male	30	4.0064	2.31141
NIO_NYU_710	18	3	1	0	astro	4	0	unknown	male	30	4.16205	1.53121
NIO_NYU_710	19	3	1	0	astro	4	0	unknown	male	30	3.89149	1.78929
NIO_NYU_710	20	3	1	0	astro	4	0	unknown	male	30	3.75385	1.61492
NIO_NYU_710	21	3	1	0	astro	4	0	unknown	male	30	3.01202	0.917874
NIO_NYU_710	22	1	1	0	astro	4	0	unknown	male	30	-1.901	-1.83207
NIO_NYU_710	23	1	1	0	astro	4	0	unknown	male	30	-1.75316	-1.67264
NIO_NYU_710	24	1	1	0	astro	4	0	unknown	male	30	-2.00405	-1.91491
NIO_NYU_710	25	1	1	0	astro	4	0	unknown	male	30	-3.05404	-1.92446
NIO_NYU_710	26	1	1	0	astro	4	0	unknown	male	30	-2.92078	-1.95085
NIO_NYU_710	27	1	1	0	astro	4	0	unknown	male	30	-0.731986	-0.84971
NIO_NYU_710	28	1	1	0	astro	4	0	unknown	male	30	-3.22298	-2.61821
NIO_NYU_710	29	0	1	0	astro	4	0	unknown	male	30	-3.38084	-2.87282
NIO_NYU_710	30	0	1	0	astro	4	0	unknown	male	30	-4.10306	-3.40888
NIO_NYU_710	31	0	1	0	astro	4	0	unknown	male	30	-4.25079	-4.41572
NIO_NYU_713	1	2	0	0	gbm	4	0	white	female	78	3.31268	3.40723
NIO_NYU_713	2	2	0	0	gbm	4	0	white	female	78	3.27698	1.01167
NIO_NYU_713	3	2	0	0	gbm	4	0	white	female	78	3.09354	1.52543
NIO_NYU_713	4	2	0	0	gbm	4	0	white	female	78	2.72636	2.43736
NIO_NYU_713	5	2	0	0	gbm	4	0	white	female	78	1.75239	1.2401
NIO_NYU_713	6	2	0	0	gbm	4	0	white	female	78	3.16085	1.52026
NIO_NYU_713	7	2	0	0	gbm	4	0	white	female	78	2.23354	1.09252
NIO_NYU_713	8	2	0	0	gbm	4	0	white	female	78	3.24164	1.62758
NIO_NYU_713	9	2	0	0	gbm	4	0	white	female	78	0.839645	-3.32934
NIO_NYU_713	10	2	0	0	gbm	4	0	white	female	78	1.49867	-2.51377
NIO_NYU_713	11	2	0	0	gbm	4	0	white	female	78	0.824462	-2.40063
NIO_NYU_713	12	2	0	0	gbm	4	0	white	female	78	1.06461	-1.35957
NIO_NYU_713	13	2	0	0	gbm	4	0	white	female	78	1.25704	-2.75819
NIO_NYU_713	14	2	0	0	gbm	4	0	white	female	78	3.282	1.24467
NIO_NYU_713	15	2	0	0	gbm	4	0	white	female	78	3.36867	1.41456
NIO_NYU_713	16	2	0	0	gbm	4	0	white	female	78	3.32908	1.5662
NIO_NYU_713	17	2	0	0	gbm	4	0	white	female	78	2.3774	0.25566
NIO_NYU_713	18	2	0	0	gbm	4	0	white	female	78	2.9728	1.31216
NIO_NYU_713	19	2	0	0	gbm	4	0	white	female	78	2.39804	0.636771
NIO_NYU_713	20	2	0	0	gbm	4	0	white	female	78	2.4671	0.424326
NIO_NYU_713	21	2	0	0	gbm	4	0	white	female	78	2.86216	0.287658
NIO_NYU_713	22	2	0	0	gbm	4	0	white	female	78	2.89192	0.799771
NIO_NYU_713	23	2	0	0	gbm	4	0	white	female	78	3.64425	1.98413
NIO_NYU_713	24	2	0	0	gbm	4	0	white	female	78	2.73189	0.735388
NIO_NYU_713	25	2	0	0	gbm	4	0	white	female	78	2.15465	1.61234
NIO_NYU_713	26	2	0	0	gbm	4	0	white	female	78	-0.390017	-3.12035
NIO_NYU_713	27	2	0	0	gbm	4	0	white	female	78	-0.0813912	-1.71587
NIO_NYU_713	28	2	0	0	gbm	4	0	white	female	78	1.03561	-0.371135
NIO_NYU_713	29	2	0	0	gbm	4	0	white	female	78	1.13988	0.0603079
NIO_NYU_716	1	2	0	0	astro	2	0	white	female	35	3.53994	2.56949
NIO_NYU_716	2	2	0	0	astro	2	0	white	female	35	3.73273	2.55777
NIO_NYU_716	3	3	0	0	astro	2	0	white	female	35	3.09873	2.32272
NIO_NYU_716	4	3	0	0	astro	2	0	white	female	35	3.02421	2.26981
NIO_NYU_716	5	3	0	0	astro	2	0	white	female	35	3.7217	2.87374
NIO_NYU_716	6	3	0	0	astro	2	0	white	female	35	3.27717	2.62821
NIO_NYU_716	7	0	0	0	astro	2	0	white	female	35	-2.67386	-2.33642
NIO_NYU_716	8	0	0	0	astro	2	0	white	female	35	-2.39062	-2.69911
NIO_NYU_716	9	0	0	0	astro	2	0	white	female	35	-2.82047	-2.66889
NIO_NYU_716	10	0	0	0	astro	2	0	white	female	35	-2.34612	-3.172
NIO_NYU_716	11	0	0	0	astro	2	0	white	female	35	-2.49363	-3.56359
NIO_NYU_716	12	0	0	0	astro	2	0	white	female	35	-2.36325	-2.98825
NIO_NYU_716	13	0	0	0	astro	2	0	white	female	35	-2.10558	-2.80622
NIO_NYU_716	14	0	0	0	astro	2	0	white	female	35	-2.93061	-3.10565
NIO_NYU_716	15	0	0	0	astro	2	0	white	female	35	-2.98169	-3.48428
NIO_NYU_716	16	0	0	0	astro	2	0	white	female	35	-2.76446	-3.5472
NIO_NYU_716	17	0	0	0	astro	2	0	white	female	35	-2.30628	-2.98896
NIO_NYU_716	18	0	0	0	astro	2	0	white	female	35	-2.55063	-3.42609
NIO_NYU_716	19	0	0	0	astro	2	0	white	female	35	-3.14565	-3.51189
NIO_NYU_716	20	0	0	0	astro	2	0	white	female	35	-1.50046	-3.2783
NIO_NYU_716	21	0	0	0	astro	2	0	white	female	35	-2.53814	-3.74308
NIO_NYU_716	22	0	0	0	astro	2	0	white	female	35	-1.75425	-3.57452
NIO_NYU_754	1	3	1	1	oligo	3	0	white	male	33	3.85256	3.98959
NIO_NYU_754	2	3	1	1	oligo	3	0	white	male	33	4.0024	4.12284
NIO_NYU_754	3	3	1	1	oligo	3	0	white	male	33	4.43951	4.41878
NIO_NYU_754	4	3	1	1	oligo	3	0	white	male	33	4.0342	3.60231
NIO_NYU_754	5	3	1	1	oligo	3	0	white	male	33	3.82128	3.53702
NIO_NYU_754	6	0	1	1	oligo	3	0	white	male	33	-3.45564	-3.01697
NIO_NYU_754	7	0	1	1	oligo	3	0	white	male	33	-1.97398	-1.64276
NIO_NYU_754	8	0	1	1	oligo	3	0	white	male	33	-2.26662	-1.68722
NIO_NYU_754	9	0	1	1	oligo	3	0	white	male	33	-2.86487	-2.48078
NIO_NYU_754	10	0	1	1	oligo	3	0	white	male	33	-3.4272	-3.8328
NIO_NYU_754	11	0	1	1	oligo	3	0	white	male	33	-3.54006	-3.93285
NIO_NYU_754	12	0	1	1	oligo	3	0	white	male	33	-3.42804	-3.79577
NIO_NYU_754	13	0	1	1	oligo	3	0	white	male	33	-3.17026	-3.77346
NIO_NYU_754	14	0	1	1	oligo	3	0	white	male	33	-3.41215	-3.94809
NIO_NYU_754	15	0	1	1	oligo	3	0	white	male	33	-3.11657	-3.90469
NIO_NYU_754	16	0	1	1	oligo	3	0	white	male	33	-3.23861	-3.54152
NIO_NYU_754	17	0	1	1	oligo	3	0	white	male	33	-3.57795	-4.67624
NIO_NYU_754	18	0	1	1	oligo	3	0	white	male	33	-3.20707	-3.99541
NIO_NYU_754	19	0	1	1	oligo	3	0	white	male	33	-2.58248	-3.2276
NIO_NYU_754	20	0	1	1	oligo	3	0	white	male	33	-3.89968	-4.56527
NIO_NYU_754	21	0	1	1	oligo	3	0	white	male	33	-2.79354	-3.4057
NIO_NYU_754	22	0	1	1	oligo	3	0	white	male	33	-5.20712	-5.13414
NIO_NYU_754	23	0	1	1	oligo	3	0	white	male	33	-4.99436	-4.9775
NIO_NYU_754	24	0	1	1	oligo	3	0	white	male	33	-4.73298	-4.93168
NIO_NYU_754	25	0	1	1	oligo	3	0	white	male	33	-3.68879	-4.4
NIO_NYU_754	26	0	1	1	oligo	3	0	white	male	33	-3.94068	-4.38535
NIO_NYU_754	27	0	1	1	oligo	3	0	white	male	33	-3.97956	-4.44777
NIO_NYU_754	28	0	1	1	oligo	3	0	white	male	33	-3.73403	-4.51343
NIO_UCSF_103473	3	3	1	0	astro	3	0	white	male	48	2.72188	3.5581
NIO_UCSF_103473	4	3	1	0	astro	3	0	white	male	48	2.50576	3.32597
NIO_UCSF_103473	5	3	1	0	astro	3	0	white	male	48	3.97008	3.96452
NIO_UCSF_103473	1	0	1	0	astro	3	0	white	male	48	-1.54022	-2.09389
NIO_UCSF_103473	2	0	1	0	astro	3	0	white	male	48	-0.999305	-1.09435
NIO_UCSF_103473	6	3	1	0	astro	3	0	white	male	48	3.62032	3.0839
NIO_UCSF_103473	7	3	1	0	astro	3	0	white	male	48	4.07505	4.61337
NIO_UCSF_103473	8	3	1	0	astro	3	0	white	male	48	2.69494	3.23643
NIO_UCSF_105297	1	2	0	0	gbm	4	1	white	male	40	-0.325536	-0.92686
NIO_UCSF_105297	2	3	0	0	gbm	4	1	white	male	40	1.19212	0.142926
NIO_UCSF_105297	11	3	0	0	gbm	4	1	white	male	40	1.95044	1.48882
NIO_UCSF_105297	12	3	0	0	gbm	4	1	white	male	40	0.687322	-1.56451
NIO_UCSF_105297	9	3	0	0	gbm	4	1	white	male	40	1.97502	0.858631
NIO_UCSF_105297	10	3	0	0	gbm	4	1	white	male	40	2.38843	1.52083
NIO_UCSF_105297	3	0	0	0	gbm	4	1	white	male	40	-0.590339	-0.711352
NIO_UCSF_105297	4	1	0	0	gbm	4	1	white	male	40	-1.11016	-1.16726
NIO_UCSF_105297	5	2	0	0	gbm	4	1	white	male	40	1.4383	0.529967
NIO_UCSF_105297	6	1	0	0	gbm	4	1	white	male	40	-1.53385	-1.14274
NIO_UCSF_105297	7	0	0	0	gbm	4	1	white	male	40	-1.19813	-1.55973
NIO_UCSF_105297	8	1	0	0	gbm	4	1	white	male	40	-0.237907	-0.825177
NIO_UCSF_106365	1	3	0	0	gbm	4	0	white	female	72	0.792537	-0.924937
NIO_UCSF_106365	2	3	0	0	gbm	4	0	white	female	72	0.255445	-1.27011
NIO_UCSF_106365	3	3	0	0	gbm	4	0	white	female	72	0.595238	-1.25884
NIO_UCSF_106365	4	3	0	0	gbm	4	0	white	female	72	-0.137513	-2.79945
NIO_UCSF_107737	1	0	0	-1	circ	-1	0	other	female	39	-1.10245	-1.17367
NIO_UCSF_107737	2	0	0	-1	circ	-1	0	other	female	39	-0.910108	-1.09342
NIO_UCSF_107737	3	2	0	-1	circ	-1	0	other	female	39	1.33598	2.36829
NIO_UCSF_107737	4	0	0	-1	circ	-1	0	other	female	39	-1.19024	-1.80858
NIO_UCSF_108811	1	0	1	0	astro	4	1	other	female	47	-1.95788	-3.34567
NIO_UCSF_108811	2	3	1	0	astro	4	1	other	female	47	3.14307	2.19749
NIO_UCSF_108811	3	3	1	0	astro	4	1	other	female	47	3.06009	3.21807
NIO_UCSF_108811	4	3	1	0	astro	4	1	other	female	47	3.19143	2.99936
NIO_UCSF_108811	5	2	1	0	astro	4	1	other	female	47	1.84725	2.49337
NIO_UCSF_109465	7	3	0	0	gbm	4	0	white	male	36	0.979409	-0.617793
NIO_UCSF_109465	8	3	0	0	gbm	4	0	white	male	36	-0.0851468	-0.387767
NIO_UCSF_109465	1	0	0	0	gbm	4	0	white	male	36	-2.36602	-2.76598
NIO_UCSF_109465	2	0	0	0	gbm	4	0	white	male	36	-0.330564	-1.26764
NIO_UCSF_109465	3	0	0	0	gbm	4	0	white	male	36	-1.59528	-1.6385
NIO_UCSF_109465	4	2	0	0	gbm	4	0	white	male	36	-0.823862	-0.459658
NIO_UCSF_109465	5	2	0	0	gbm	4	0	white	male	36	-0.412641	-1.09973
NIO_UCSF_109465	6	1	0	0	gbm	4	0	white	male	36	-2.00567	-3.5891
NIO_UCSF_11330	6	2	1	0	astro	4	1	black or african american	male	54	0.798285	1.92444
NIO_UCSF_113587	2	2	0	0	gbm	4	0	white	male	43	0.920781	0.888248
NIO_UCSF_113587	3	2	0	0	gbm	4	0	white	male	43	-1.00221	-2.41231
NIO_UCSF_113587	4	2	0	0	gbm	4	0	white	male	43	0.548038	-0.495746
NIO_UCSF_113587	5	0	0	0	gbm	4	0	white	male	43	0.808296	-0.27641
NIO_UCSF_113587	1	3	0	0	gbm	4	0	white	male	43	3.63262	3.81864
NIO_UCSF_114346	3	2	-1	1	oligo	3	0	declined	male	57	0.369899	0.149131
NIO_UCSF_114346	4	3	-1	1	oligo	3	0	declined	male	57	3.72725	3.57472
NIO_UCSF_114346	5	3	-1	1	oligo	3	0	declined	male	57	4.11863	4.40386
NIO_UCSF_114346	1	0	-1	1	oligo	3	0	declined	male	57	-1.55341	-2.21138
NIO_UCSF_114346	2	0	-1	1	oligo	3	0	declined	male	57	-2.41678	-3.56963
NIO_UCSF_114346	7	2	-1	1	oligo	3	0	declined	male	57	-1.16431	-3.01742
NIO_UCSF_115417	3	3	0	0	gbm	4	0	asian	male	72	3.27309	2.01089
NIO_UCSF_115417	4	3	0	0	gbm	4	0	asian	male	72	3.34558	1.74195
NIO_UCSF_115417	5	3	0	0	gbm	4	0	asian	male	72	2.73227	3.32562
NIO_UCSF_115417	6	3	0	0	gbm	4	0	asian	male	72	2.49025	2.943
NIO_UCSF_115417	1	1	0	0	gbm	4	0	asian	male	72	-1.74762	-2.67249
NIO_UCSF_115417	2	2	0	0	gbm	4	0	asian	male	72	-1.23688	-1.61376
NIO_UCSF_115417	7	2	0	0	gbm	4	0	asian	male	72	1.12785	1.13284
NIO_UCSF_115417	8	1	0	0	gbm	4	0	asian	male	72	-1.79914	-2.06719
NIO_UCSF_115417	9	0	0	0	gbm	4	0	asian	male	72	-1.79867	-2.15154
NIO_UCSF_116351	1	0	1	1	oligo	3	1	other	female	43	-1.57461	-2.47336
NIO_UCSF_116351	2	2	1	1	oligo	3	1	other	female	43	-0.707481	-1.61636
NIO_UCSF_116351	3	3	1	1	oligo	3	1	other	female	43	3.14006	3.2257
NIO_UCSF_116351	4	3	1	1	oligo	3	1	other	female	43	3.60203	2.36501
NIO_UCSF_116351	5	3	1	1	oligo	3	1	other	female	43	3.08133	2.247
NIO_UCSF_116351	7	3	1	1	oligo	3	1	other	female	43	3.08872	1.99412
NIO_UCSF_116351	6	2	1	1	oligo	3	1	other	female	43	0.656396	1.27164
NIO_UCSF_117375	1	3	-1	0	gbm	4	0	white	male	66	3.13085	2.05162
NIO_UCSF_117375	2	3	-1	0	gbm	4	0	white	male	66	3.08717	2.09622
NIO_UCSF_117375	3	3	-1	0	gbm	4	0	white	male	66	3.91838	2.04541
NIO_UCSF_117375	4	3	-1	0	gbm	4	0	white	male	66	3.97191	2.08605
NIO_UCSF_117375	5	2	-1	0	gbm	4	0	white	male	66	0.657764	0.331962
NIO_UCSF_117375	6	2	-1	0	gbm	4	0	white	male	66	0.903005	0.155559
NIO_UCSF_117375	7	2	-1	0	gbm	4	0	white	male	66	1.01645	0.112975
NIO_UCSF_117375	8	2	-1	0	gbm	4	0	white	male	66	0.919376	0.0563513
NIO_UCSF_117375	9	2	-1	0	gbm	4	0	white	male	66	2.66253	1.51898
NIO_UCSF_117375	10	2	-1	0	gbm	4	0	white	male	66	0.907417	0.103679
NIO_UCSF_118425	4	3	0	0	gbm	4	0	asian	male	19	3.21116	3.51351
NIO_UCSF_118425	5	1	0	0	gbm	4	0	asian	male	19	-0.636289	-0.706602
NIO_UCSF_118425	6	1	0	0	gbm	4	0	asian	male	19	-0.947844	-1.07675
NIO_UCSF_119323	1	3	0	0	gbm	-1	0	other	female	19	2.13544	-0.211714
NIO_UCSF_120839	1	3	0	0	gbm	4	1	asian	female	65	3.0565	1.69292
NIO_UCSF_120839	2	3	0	0	gbm	4	1	asian	female	65	2.4406	1.83025
NIO_UCSF_120839	3	2	0	0	gbm	4	1	asian	female	65	-0.0570609	-0.854748
NIO_UCSF_120839	4	2	0	0	gbm	4	1	asian	female	65	0.837561	0.103971
NIO_UCSF_120839	5	2	0	0	gbm	4	1	asian	female	65	0.723797	-0.232608
NIO_UCSF_120839	6	2	0	0	gbm	4	1	asian	female	65	0.758571	-0.503554
NIO_UCSF_120839	7	2	0	0	gbm	4	1	asian	female	65	0.423507	-1.07876
NIO_UCSF_121503	1	2	1	1	oligo	3	0	white	male	35	0.796279	-0.234386
NIO_UCSF_121503	2	2	1	1	oligo	3	0	white	male	35	0.949149	0.467203
NIO_UCSF_121503	3	3	1	1	oligo	3	0	white	male	35	3.43814	1.89419
NIO_UCSF_121503	4	1	1	1	oligo	3	0	white	male	35	-1.27276	-1.84703
NIO_UCSF_121503	5	0	1	1	oligo	3	0	white	male	35	-1.59529	-2.0484
NIO_UCSF_121503	6	3	1	1	oligo	3	0	white	male	35	3.7616	2.64932
NIO_UCSF_121503	7	3	1	1	oligo	3	0	white	male	35	4.18566	2.30688
NIO_UCSF_121503	8	0	1	1	oligo	3	0	white	male	35	-0.772055	-1.26375
NIO_UCSF_121503	9	0	1	1	oligo	3	0	white	male	35	-0.748028	-1.2317
NIO_UCSF_121503	10	0	1	1	oligo	3	0	white	male	35	-1.89561	-2.2485
NIO_UCSF_121503	11	0	1	1	oligo	3	0	white	male	35	-1.0724	-1.64157
NIO_UCSF_121503	12	0	1	1	oligo	3	0	white	male	35	-0.141339	-0.509708
NIO_UCSF_121503	14	0	1	1	oligo	3	0	white	male	35	-0.638542	-1.9075
NIO_UCSF_121503	13	0	1	1	oligo	3	0	white	male	35	-1.75667	-3.10473
NIO_UCSF_121503	15	0	1	1	oligo	3	0	white	male	35	-0.810398	-1.49378
NIO_UCSF_121503	16	0	1	1	oligo	3	0	white	male	35	-1.02339	-2.13062
NIO_UCSF_122794	12	2	1	0	astro	2	0	white	male	51	-0.825598	-0.797956
NIO_UCSF_122794	3	3	1	0	astro	2	0	white	male	51	3.76393	3.69753
NIO_UCSF_122794	4	3	1	0	astro	2	0	white	male	51	3.74863	3.72784
NIO_UCSF_122794	5	3	1	0	astro	2	0	white	male	51	4.02228	4.08836
NIO_UCSF_122794	6	3	1	0	astro	2	0	white	male	51	3.85314	3.55524
NIO_UCSF_122794	11	0	1	0	astro	2	0	white	male	51	-1.17419	-1.50073
NIO_UCSF_122794	10	0	1	0	astro	2	0	white	male	51	-1.23548	-1.18022
NIO_UCSF_122794	1	0	1	0	astro	2	0	white	male	51	-1.07881	-1.34967
NIO_UCSF_122794	2	2	1	0	astro	2	0	white	male	51	-1.17389	-1.50175
NIO_UCSF_122794	9	2	1	0	astro	2	0	white	male	51	-0.275114	-0.270671
NIO_UCSF_122794	7	1	1	0	astro	2	0	white	male	51	-1.29382	-1.70775
NIO_UCSF_122794	8	2	1	0	astro	2	0	white	male	51	-0.582853	0.409844
NIO_UCSF_1231014	1	0	1	0	astro	2	1	white	female	57	-1.52219	-1.84224
NIO_UCSF_1231014	2	1	1	0	astro	2	1	white	female	57	-0.135797	-0.509209
NIO_UCSF_1231014	3	0	1	0	astro	2	1	white	female	57	-1.26753	-1.44077
NIO_UCSF_1231014	4	2	1	0	astro	2	1	white	female	57	-0.733182	-0.846815
NIO_UCSF_124344	1	3	0	0	gbm	4	1	white	female	67	3.31523	1.4431
NIO_UCSF_124344	2	2	0	0	gbm	4	1	white	female	67	2.03119	1.9613
NIO_UCSF_124344	3	2	0	0	gbm	4	1	white	female	67	1.27885	1.05737
NIO_UCSF_124344	4	2	0	0	gbm	4	1	white	female	67	0.192983	0.00372393
NIO_UCSF_124344	5	2	0	0	gbm	4	1	white	female	67	0.547331	0.310125
NIO_UCSF_124344	6	2	0	0	gbm	4	1	white	female	67	2.22637	1.70296
NIO_UCSF_125932	4	3	1	1	oligo	2	0	other	female	34	4.17345	3.53536
NIO_UCSF_125932	5	3	1	1	oligo	2	0	other	female	34	3.89214	2.96563
NIO_UCSF_125932	6	3	1	1	oligo	2	0	other	female	34	4.07016	2.68088
NIO_UCSF_125932	8	2	1	1	oligo	2	0	other	female	34	0.961138	1.03727
NIO_UCSF_125932	9	2	1	1	oligo	2	0	other	female	34	-1.18213	-1.60071
NIO_UCSF_125932	1	3	1	1	oligo	2	0	other	female	34	2.98821	2.21384
NIO_UCSF_125932	2	3	1	1	oligo	2	0	other	female	34	4.20085	3.19134
NIO_UCSF_125932	3	2	1	1	oligo	2	0	other	female	34	-1.19752	-1.46483
NIO_UCSF_125932	7	0	1	1	oligo	2	0	other	female	34	-1.4824	-1.84332
NIO_UCSF_12629	9	2	1	1	oligo	3	1	white	male	50	1.61575	2.43826
NIO_UCSF_12629	11	2	1	1	oligo	3	1	white	male	50	1.21341	2.12403
NIO_UCSF_12629	8	1	1	1	oligo	3	1	white	male	50	-0.00326048	0.613488
NIO_UCSF_12629	10	3	1	1	oligo	3	1	white	male	50	1.53219	2.72295
NIO_UCSF_12629	1	3	1	1	oligo	3	1	white	male	50	2.33989	1.5287
NIO_UCSF_12629	2	3	1	1	oligo	3	1	white	male	50	3.41729	2.83649
NIO_UCSF_12629	3	2	1	1	oligo	3	1	white	male	50	1.6415	1.6667
NIO_UCSF_12629	4	3	1	1	oligo	3	1	white	male	50	2.38653	2.37197
NIO_UCSF_12629	5	2	1	1	oligo	3	1	white	male	50	2.14691	1.14816
NIO_UCSF_12629	6	3	1	1	oligo	3	1	white	male	50	3.27917	2.68552
NIO_UCSF_12629	7	3	1	1	oligo	3	1	white	male	50	2.38222	2.24278
NIO_UCSF_127633	1	2	0	0	gbm	4	1	white	male	75	0.781377	0.717666
NIO_UCSF_127633	2	2	0	0	gbm	4	1	white	male	75	-0.660053	-0.856716
NIO_UCSF_127633	6	2	0	0	gbm	4	1	white	male	75	1.39975	1.46843
NIO_UCSF_127633	3	2	0	0	gbm	4	1	white	male	75	1.49358	2.06732
NIO_UCSF_127633	4	0	0	0	gbm	4	1	white	male	75	-0.811129	-0.171554
NIO_UCSF_127633	5	2	0	0	gbm	4	1	white	male	75	1.84323	2.43078
NIO_UCSF_127633	7	0	0	0	gbm	4	1	white	male	75	-0.308392	0.662356
NIO_UCSF_127633	8	2	0	0	gbm	4	1	white	male	75	0.745434	0.902771
NIO_UCSF_127633	9	2	0	0	gbm	4	1	white	male	75	-1.96292	-2.18288
NIO_UCSF_127633	10	2	0	0	gbm	4	1	white	male	75	0.947473	0.75357
NIO_UCSF_128232	1	3	0	0	gbm	4	0	white	male	77	2.78157	1.02715
NIO_UCSF_128232	2	3	0	0	gbm	4	0	white	male	77	2.45455	1.15617
NIO_UCSF_128232	3	3	0	0	gbm	4	0	white	male	77	4.25016	3.66122
NIO_UCSF_128232	4	0	0	0	gbm	4	0	white	male	77	-0.570398	-0.62432
NIO_UCSF_128232	5	1	0	0	gbm	4	0	white	male	77	-0.575522	-0.0427113
NIO_UCSF_128232	6	2	0	0	gbm	4	0	white	male	77	0.0988777	-0.0749713
NIO_UCSF_129158	1	3	0	0	gbm	4	1	other	male	71	3.40254	-0.597723
NIO_UCSF_129158	2	3	0	0	gbm	4	1	other	male	71	3.91577	0.466864
NIO_UCSF_129158	3	1	0	0	gbm	4	1	other	male	71	-1.36515	-2.10253
NIO_UCSF_129158	4	2	0	0	gbm	4	1	other	male	71	1.23156	1.40622
NIO_UCSF_129158	5	2	0	0	gbm	4	1	other	male	71	1.35866	1.55121
NIO_UCSF_129158	6	1	0	0	gbm	4	1	other	male	71	-1.12354	-0.998999
NIO_UCSF_130858	1	3	0	0	gbm	4	0	other	male	46	2.21668	1.32286
NIO_UCSF_130858	2	3	0	0	gbm	4	0	other	male	46	3.19035	2.65712
NIO_UCSF_130858	3	1	0	0	gbm	4	0	other	male	46	-1.80612	-1.90629
NIO_UCSF_130858	4	0	0	0	gbm	4	0	other	male	46	-2.50823	-3.26218
NIO_UCSF_130858	5	1	0	0	gbm	4	0	other	male	46	-1.71166	-1.92329
NIO_UCSF_130858	6	2	0	0	gbm	4	0	other	male	46	-1.00699	-2.12607
NIO_UCSF_130858	7	2	0	0	gbm	4	0	other	male	46	-0.291979	-0.360533
NIO_UCSF_130858	8	2	0	0	gbm	4	0	other	male	46	-0.753113	-0.869972
NIO_UCSF_131442	1	0	-1	-1	circ	1	1	asian	male	40	-1.49919	-2.03522
NIO_UCSF_131442	2	0	-1	-1	circ	1	1	asian	male	40	-1.323	-1.81913
NIO_UCSF_131442	3	2	-1	-1	circ	1	1	asian	male	40	0.725864	1.21069
NIO_UCSF_131442	4	2	-1	-1	circ	1	1	asian	male	40	0.865839	0.49915
NIO_UCSF_132140	5	3	1	0	astro	4	1	asian	male	37	4.69372	5.21109
NIO_UCSF_132140	6	2	1	0	astro	4	1	asian	male	37	1.51224	2.22167
NIO_UCSF_132140	1	1	1	0	astro	4	1	asian	male	37	-1.16175	-1.46268
NIO_UCSF_132140	2	0	1	0	astro	4	1	asian	male	37	-0.453582	-0.329527
NIO_UCSF_132140	3	3	1	0	astro	4	1	asian	male	37	4.64614	4.51268
NIO_UCSF_132140	4	3	1	0	astro	4	1	asian	male	37	4.77282	6.04366
NIO_UCSF_132140	7	3	1	0	astro	4	1	asian	male	37	1.08357	1.51233
NIO_UCSF_132140	8	3	1	0	astro	4	1	asian	male	37	2.24449	2.08777
NIO_UCSF_132140	9	2	1	0	astro	4	1	asian	male	37	1.40097	1.74027
NIO_UCSF_132140	10	3	1	0	astro	4	1	asian	male	37	4.85406	5.08
NIO_UCSF_133469	2	2	1	0	astro	2	0	white	male	48	1.01061	1.87621
NIO_UCSF_133469	3	3	1	0	astro	2	0	white	male	48	1.9156	2.34819
NIO_UCSF_133469	4	2	1	0	astro	2	0	white	male	48	2.30254	2.92503
NIO_UCSF_133469	7	2	1	0	astro	2	0	white	male	48	2.02631	3.62462
NIO_UCSF_133469	1	1	1	0	astro	2	0	white	male	48	-0.978615	-0.867885
NIO_UCSF_133469	5	2	1	0	astro	2	0	white	male	48	-0.806072	0.17363
NIO_UCSF_133469	6	2	1	0	astro	2	0	white	male	48	1.82539	2.84561
NIO_UCSF_133469	8	2	1	0	astro	2	0	white	male	48	1.56964	1.89176
NIO_UCSF_133469	9	2	1	0	astro	2	0	white	male	48	2.10447	2.6529
NIO_UCSF_13394	1	3	0	0	gbm	4	0	white	male	84	1.5625	3.05111
NIO_UCSF_13394	2	3	0	0	gbm	4	0	white	male	84	1.43204	2.50365
NIO_UCSF_13394	5	3	0	0	gbm	4	0	white	male	84	3.67045	3.48103
NIO_UCSF_135406	1	3	1	0	astro	3	1	white	male	48	2.4937	2.95095
NIO_UCSF_135406	2	1	1	0	astro	3	1	white	male	48	-1.7777	-1.6766
NIO_UCSF_135406	3	3	1	0	astro	3	1	white	male	48	3.28614	3.74831
NIO_UCSF_135406	4	2	1	0	astro	3	1	white	male	48	1.70189	2.62859
NIO_UCSF_135406	5	2	1	0	astro	3	1	white	male	48	1.87762	2.47496
NIO_UCSF_138214	2	3	-1	-1	circ	1	0	white	male	18	3.58512	1.93005
NIO_UCSF_138214	3	3	-1	-1	circ	1	0	white	male	18	3.39995	1.12572
NIO_UCSF_138214	4	3	-1	-1	circ	1	0	white	male	18	3.28887	1.8532
NIO_UCSF_139670	1	3	0	0	gbm	4	1	white	female	71	1.73417	-0.343028
NIO_UCSF_139670	2	3	0	0	gbm	4	1	white	female	71	3.30652	0.634446
NIO_UCSF_139670	3	3	0	0	gbm	4	1	white	female	71	2.14235	0.667338
NIO_UCSF_139670	4	3	0	0	gbm	4	1	white	female	71	1.78766	0.863786
NIO_UCSF_139670	5	2	0	0	gbm	4	1	white	female	71	-0.217154	0.287423
NIO_UCSF_139670	6	0	0	0	gbm	4	1	white	female	71	-1.13979	-1.35533
NIO_UCSF_139670	7	0	0	0	gbm	4	1	white	female	71	-1.98013	-2.69176
NIO_UCSF_139670	8	0	0	0	gbm	4	1	white	female	71	-1.83604	-2.56204
NIO_UCSF_14147	1	3	1	1	oligo	3	1	white	male	77	4.20498	3.30513
NIO_UCSF_14147	2	3	1	1	oligo	3	1	white	male	77	3.97879	3.54654
NIO_UCSF_14147	3	3	1	1	oligo	3	1	white	male	77	4.23027	3.07253
NIO_UCSF_14147	4	2	1	1	oligo	3	1	white	male	77	0.142589	-1.85556
NIO_UCSF_14147	5	2	1	1	oligo	3	1	white	male	77	1.95801	1.07577
NIO_UCSF_14147	6	2	1	1	oligo	3	1	white	male	77	-1.67066	-2.22124
NIO_UCSF_14147	7	0	1	1	oligo	3	1	white	male	77	0.280863	-0.327652
NIO_UCSF_14147	8	0	1	1	oligo	3	1	white	male	77	-2.46141	-3.14744
NIO_UCSF_142173	1	3	0	0	gbm	4	1	white	male	68	2.09638	1.08516
NIO_UCSF_142173	2	3	0	0	gbm	4	1	white	male	68	3.10589	0.569146
NIO_UCSF_142173	3	0	0	0	gbm	4	1	white	male	68	-1.29751	-1.48593
NIO_UCSF_142173	4	0	0	0	gbm	4	1	white	male	68	-2.04351	-2.68946
NIO_UCSF_142173	5	2	0	0	gbm	4	1	white	male	68	0.680847	0.994507
NIO_UCSF_143357	1	3	0	0	gbm	4	1	other	male	62	3.23473	3.17903
NIO_UCSF_143357	2	3	0	0	gbm	4	1	other	male	62	3.58338	2.79205
NIO_UCSF_143357	3	3	0	0	gbm	4	1	other	male	62	4.12542	2.683
NIO_UCSF_143357	4	3	0	0	gbm	4	1	other	male	62	3.78479	2.29197
NIO_UCSF_143357	5	3	0	0	gbm	4	1	other	male	62	3.94157	2.43334
NIO_UCSF_143357	6	1	0	0	gbm	4	1	other	male	62	0.0912103	-0.0270373
NIO_UCSF_145225	1	0	1	0	astro	3	1	declined	female	38	-1.151	-1.33995
NIO_UCSF_145225	2	1	1	0	astro	3	1	declined	female	38	-1.27971	-1.34357
NIO_UCSF_145225	3	3	1	0	astro	3	1	declined	female	38	3.13584	5.22766
NIO_UCSF_145225	4	3	1	0	astro	3	1	declined	female	38	1.88481	3.66517
NIO_UCSF_145225	5	3	1	0	astro	3	1	declined	female	38	2.50796	3.66234
NIO_UCSF_145225	6	2	1	0	astro	3	1	declined	female	38	1.01258	1.05811
NIO_UCSF_145225	7	1	1	0	astro	3	1	declined	female	38	-1.12917	-1.37083
NIO_UCSF_145225	8	3	1	0	astro	3	1	declined	female	38	2.78999	4.82666
NIO_UCSF_145225	9	3	1	0	astro	3	1	declined	female	38	2.85955	5.3301
NIO_UCSF_14635	2	3	1	0	astro	4	1	white	female	26	3.73056	5.36206
NIO_UCSF_14635	4	3	1	0	astro	4	1	white	female	26	3.90457	5.34704
NIO_UCSF_14635	5	2	1	0	astro	4	1	white	female	26	1.13341	0.721356
NIO_UCSF_14635	8	2	1	0	astro	4	1	white	female	26	0.489024	0.52986
NIO_UCSF_14635	6	0	1	0	astro	4	1	white	female	26	1.57192	1.68033
NIO_UCSF_14635	7	2	1	0	astro	4	1	white	female	26	1.20725	0.997516
NIO_UCSF_14635	9	2	1	0	astro	4	1	white	female	26	-1.36842	-2.09243
NIO_UCSF_14635	10	2	1	0	astro	4	1	white	female	26	-1.35234	-1.72813
NIO_UCSF_14635	11	1	1	0	astro	4	1	white	female	26	1.01392	1.0786
NIO_UCSF_14635	12	2	1	0	astro	4	1	white	female	26	1.84658	2.63275
NIO_UCSF_14635	13	2	1	0	astro	4	1	white	female	26	2.85473	2.97487
NIO_UCSF_14635	1	0	1	0	astro	4	1	white	female	26	-1.51931	-1.9527
NIO_UCSF_14635	3	0	1	0	astro	4	1	white	female	26	-1.29254	-1.69925
NIO_UCSF_146634	1	3	1	1	oligo	2	0	white	female	37	2.43518	3.4303
NIO_UCSF_146634	2	3	1	1	oligo	2	0	white	female	37	2.53435	2.93349
NIO_UCSF_146634	3	3	1	1	oligo	2	0	white	female	37	2.08397	2.28958
NIO_UCSF_146634	4	2	1	1	oligo	2	0	white	female	37	-0.753964	-0.943908
NIO_UCSF_146634	5	1	1	1	oligo	2	0	white	female	37	-1.45732	-1.67969
NIO_UCSF_146634	6	2	1	1	oligo	2	0	white	female	37	0.793634	1.12182
NIO_UCSF_146634	7	2	1	1	oligo	2	0	white	female	37	1.82786	2.18509
NIO_UCSF_146634	8	2	1	1	oligo	2	0	white	female	37	0.240685	0.860653
NIO_UCSF_146634	9	2	1	1	oligo	2	0	white	female	37	-0.139623	-0.0959618
NIO_UCSF_147101	1	2	0	0	gbm	4	1	white	male	53	3.44044	4.49465
NIO_UCSF_147101	2	3	0	0	gbm	4	1	white	male	53	3.44503	1.91312
NIO_UCSF_147101	3	2	0	0	gbm	4	1	white	male	53	1.47024	1.82588
NIO_UCSF_147101	4	0	0	0	gbm	4	1	white	male	53	-0.925218	-1.19349
NIO_UCSF_147101	5	1	0	0	gbm	4	1	white	male	53	0.327335	0.57316
NIO_UCSF_147101	6	0	0	0	gbm	4	1	white	male	53	-2.51512	-3.19104
NIO_UCSF_147101	7	0	0	0	gbm	4	1	white	male	53	-2.14843	-3.17379
NIO_UCSF_147101	8	2	0	0	gbm	4	1	white	male	53	2.2194	1.88643
NIO_UCSF_147101	9	2	0	0	gbm	4	1	white	male	53	2.61827	2.09938
NIO_UCSF_14859	1	3	0	0	gbm	4	0	white	male	75	3.89999	4.69204
NIO_UCSF_14859	2	3	0	0	gbm	4	0	white	male	75	2.65571	2.81072
NIO_UCSF_14859	3	3	0	0	gbm	4	0	white	male	75	3.74462	3.02801
NIO_UCSF_14859	4	3	0	0	gbm	4	0	white	male	75	3.18453	4.17732
NIO_UCSF_149609	1	3	0	0	gbm	4	0	white	female	62	3.12593	2.96192
NIO_UCSF_149609	2	3	0	0	gbm	4	0	white	female	62	3.70102	4.06875
NIO_UCSF_149609	3	2	0	0	gbm	4	0	white	female	62	0.446143	-1.11778
NIO_UCSF_149609	4	2	0	0	gbm	4	0	white	female	62	-0.144027	-1.42732
NIO_UCSF_149609	5	3	0	0	gbm	4	0	white	female	62	2.38719	2.78399
NIO_UCSF_149609	6	3	0	0	gbm	4	0	white	female	62	2.28465	2.51889
NIO_UCSF_149609	7	3	0	0	gbm	4	0	white	female	62	3.81923	3.94226
NIO_UCSF_149609	8	2	0	0	gbm	4	0	white	female	62	-0.439379	-1.37862
NIO_UCSF_149609	9	2	0	0	gbm	4	0	white	female	62	1.43294	-0.307143
NIO_UCSF_149609	10	2	0	0	gbm	4	0	white	female	62	3.73387	1.72341
NIO_UCSF_149609	11	2	0	0	gbm	4	0	white	female	62	3.74489	1.52704
NIO_UCSF_150670	1	2	-1	1	oligo	2	1	white	female	31	1.85974	1.395
NIO_UCSF_150670	2	2	-1	1	oligo	2	1	white	female	31	1.95339	1.27978
NIO_UCSF_150670	3	2	-1	1	oligo	2	1	white	female	31	0.46742	0.103225
NIO_UCSF_150670	4	2	-1	1	oligo	2	1	white	female	31	0.829606	0.277988
NIO_UCSF_150670	5	0	-1	1	oligo	2	1	white	female	31	-2.88488	-3.27949
NIO_UCSF_150670	6	3	-1	1	oligo	2	1	white	female	31	3.7715	3.59719
NIO_UCSF_150670	7	3	-1	1	oligo	2	1	white	female	31	2.58086	3.0367
NIO_UCSF_151922	1	2	0	0	gbm	4	0	asian	female	73	1.12441	1.48646
NIO_UCSF_151922	2	2	0	0	gbm	4	0	asian	female	73	1.51008	1.68757
NIO_UCSF_151922	3	2	0	0	gbm	4	0	asian	female	73	1.16567	2.23357
NIO_UCSF_151922	4	2	0	0	gbm	4	0	asian	female	73	2.37766	3.30431
NIO_UCSF_151922	5	0	0	0	gbm	4	0	asian	female	73	-1.54476	-2.39477
NIO_UCSF_151922	6	2	0	0	gbm	4	0	asian	female	73	-0.463216	-0.0453535
NIO_UCSF_151922	7	2	0	0	gbm	4	0	asian	female	73	-1.1227	-1.51835
NIO_UCSF_152570	3	3	-1	1	oligo	3	1	white	male	60	3.93912	3.69008
NIO_UCSF_152570	1	2	-1	1	oligo	3	1	white	male	60	-0.90337	-1.36597
NIO_UCSF_152570	2	2	-1	1	oligo	3	1	white	male	60	1.03922	0.503196
NIO_UCSF_152570	4	2	-1	1	oligo	3	1	white	male	60	1.24178	1.97083
NIO_UCSF_152570	5	2	-1	1	oligo	3	1	white	male	60	0.127352	0.382755
NIO_UCSF_152570	6	2	-1	1	oligo	3	1	white	male	60	0.930866	1.0511
NIO_UCSF_153793	1	3	0	0	gbm	4	0	white	male	71	3.37973	2.77419
NIO_UCSF_153793	2	0	0	0	gbm	4	0	white	male	71	-0.212418	0.209756
NIO_UCSF_153793	3	0	0	0	gbm	4	0	white	male	71	-0.840291	-1.36413
NIO_UCSF_153793	4	2	0	0	gbm	4	0	white	male	71	0.499401	0.549841
NIO_UCSF_153793	5	0	0	0	gbm	4	0	white	male	71	-2.04435	-2.22824
NIO_UCSF_15421	4	3	0	0	gbm	4	0	asian	female	55	1.03977	2.59
NIO_UCSF_15421	5	3	0	0	gbm	4	0	asian	female	55	2.40911	1.14987
NIO_UCSF_15421	6	2	0	0	gbm	4	0	asian	female	55	2.83704	3.40846
NIO_UCSF_15421	1	1	0	0	gbm	4	0	asian	female	55	-0.63537	-0.313596
NIO_UCSF_15421	2	0	0	0	gbm	4	0	asian	female	55	-1.10045	-1.40892
NIO_UCSF_15421	3	0	0	0	gbm	4	0	asian	female	55	-0.978237	-1.02594
NIO_UCSF_15421	7	2	0	0	gbm	4	0	asian	female	55	3.4739	4.6546
NIO_UCSF_15421	8	3	0	0	gbm	4	0	asian	female	55	2.43047	3.66002
NIO_UCSF_15421	9	2	0	0	gbm	4	0	asian	female	55	1.41484	2.21545
NIO_UCSF_15421	10	2	0	0	gbm	4	0	asian	female	55	0.410423	1.25277
NIO_UCSF_155204	1	3	1	0	astro	2	0	other	male	37	2.71971	1.4873
NIO_UCSF_155204	2	3	1	0	astro	2	0	other	male	37	2.84358	3.08502
NIO_UCSF_155204	3	3	1	0	astro	2	0	other	male	37	2.93735	3.55755
NIO_UCSF_155204	4	3	1	0	astro	2	0	other	male	37	1.98492	2.83546
NIO_UCSF_155204	5	3	1	0	astro	2	0	other	male	37	2.64585	3.3253
NIO_UCSF_157889	1	3	0	0	gbm	4	0	other	male	65	3.05627	3.7559
NIO_UCSF_157889	2	3	0	0	gbm	4	0	other	male	65	2.20572	1.75521
NIO_UCSF_157889	3	3	0	0	gbm	4	0	other	male	65	2.09593	2.06543
NIO_UCSF_157889	4	3	0	0	gbm	4	0	other	male	65	1.37958	3.02837
NIO_UCSF_158976	9	2	0	0	gbm	4	0	other	male	51	2.92678	1.93948
NIO_UCSF_158976	11	3	0	0	gbm	4	0	other	male	51	3.4808	2.73421
NIO_UCSF_158976	12	3	0	0	gbm	4	0	other	male	51	3.14395	2.41743
NIO_UCSF_158976	3	3	0	0	gbm	4	0	other	male	51	2.45441	3.12608
NIO_UCSF_158976	4	3	0	0	gbm	4	0	other	male	51	3.1431	3.26106
NIO_UCSF_158976	5	3	0	0	gbm	4	0	other	male	51	3.27951	3.2911
NIO_UCSF_158976	6	3	0	0	gbm	4	0	other	male	51	2.78518	2.29888
NIO_UCSF_158976	7	2	0	0	gbm	4	0	other	male	51	0.231931	0.322321
NIO_UCSF_158976	10	2	0	0	gbm	4	0	other	male	51	0.472952	0.125826
NIO_UCSF_158976	8	2	0	0	gbm	4	0	other	male	51	1.34202	1.08071
NIO_UCSF_158976	1	0	0	0	gbm	4	0	other	male	51	-1.18767	-1.66073
NIO_UCSF_158976	2	0	0	0	gbm	4	0	other	male	51	-1.4538	-1.87321
NIO_UCSF_158976	13	3	0	0	gbm	4	0	other	male	51	2.0389	2.04451
NIO_UCSF_158976	14	3	0	0	gbm	4	0	other	male	51	2.03507	1.83936
NIO_UCSF_159525	3	3	0	0	gbm	4	0	white	male	78	4.15955	5.52708
NIO_UCSF_159525	4	3	0	0	gbm	4	0	white	male	78	3.08174	2.71558
NIO_UCSF_159525	1	1	0	0	gbm	4	0	white	male	78	0.533747	-0.31091
NIO_UCSF_159525	2	1	0	0	gbm	4	0	white	male	78	0.254563	-0.356156
NIO_UCSF_159525	5	1	0	0	gbm	4	0	white	male	78	1.24043	1.15384
NIO_UCSF_159525	6	0	0	0	gbm	4	0	white	male	78	0.0426353	-0.492506
NIO_UCSF_159525	7	2	0	0	gbm	4	0	white	male	78	-1.01225	-1.62354
NIO_UCSF_159525	8	2	0	0	gbm	4	0	white	male	78	2.62612	2.29891
NIO_UCSF_16112	1	3	0	0	gbm	4	0	white	female	84	2.52014	2.75325
NIO_UCSF_16112	2	3	0	0	gbm	4	0	white	female	84	2.54504	1.53053
NIO_UCSF_16112	3	3	0	0	gbm	4	0	white	female	84	2.35895	3.05132
NIO_UCSF_16112	4	0	0	0	gbm	4	0	white	female	84	-1.58002	-1.74197
NIO_UCSF_16112	5	0	0	0	gbm	4	0	white	female	84	-2.09616	-2.66706
NIO_UCSF_16112	6	0	0	0	gbm	4	0	white	female	84	-1.58188	-2.6282
NIO_UCSF_16112	7	0	0	0	gbm	4	0	white	female	84	-1.92935	-2.76698
NIO_UCSF_162688	3	3	0	0	gbm	4	0	white	male	68	4.07702	5.8635
NIO_UCSF_162688	4	3	0	0	gbm	4	0	white	male	68	3.94446	5.68964
NIO_UCSF_162688	1	0	0	0	gbm	4	0	white	male	68	-1.45279	-2.30146
NIO_UCSF_162688	2	0	0	0	gbm	4	0	white	male	68	-0.577747	-1.36343
NIO_UCSF_162688	5	2	0	0	gbm	4	0	white	male	68	-0.309007	-0.297646
NIO_UCSF_162688	6	1	0	0	gbm	4	0	white	male	68	0.340888	-0.0515933
NIO_UCSF_162688	7	2	0	0	gbm	4	0	white	male	68	0.990168	0.770285
NIO_UCSF_163842	4	1	1	0	astro	3	1	white	female	24	-0.42425	-0.151265
NIO_UCSF_163842	1	2	1	0	astro	3	1	white	female	24	4.23966	3.17512
NIO_UCSF_163842	2	2	1	0	astro	3	1	white	female	24	3.32777	2.8471
NIO_UCSF_163842	3	3	1	0	astro	3	1	white	female	24	4.15634	3.65189
NIO_UCSF_163842	8	1	1	0	astro	3	1	white	female	24	1.43331	2.18614
NIO_UCSF_163842	10	0	1	0	astro	3	1	white	female	24	-0.112972	-0.182385
NIO_UCSF_163842	6	1	1	0	astro	3	1	white	female	24	0.194622	0.844486
NIO_UCSF_163842	7	0	1	0	astro	3	1	white	female	24	-0.083098	0.49218
NIO_UCSF_163842	5	1	1	0	astro	3	1	white	female	24	1.70608	1.47051
NIO_UCSF_163842	9	1	1	0	astro	3	1	white	female	24	1.05018	0.168406
NIO_UCSF_1641212	1	1	0	0	gbm	4	1	asian other pacific islander	male	52	0.64187	0.844717
NIO_UCSF_1641212	2	1	0	0	gbm	4	1	asian other pacific islander	male	52	0.64184	0.866718
NIO_UCSF_16494	1	3	-1	-1	circ	4	1	white	male	39	2.94719	1.81932
NIO_UCSF_16494	2	3	-1	-1	circ	4	1	white	male	39	3.22993	1.85622
NIO_UCSF_16494	3	3	-1	-1	circ	4	1	white	male	39	2.44202	0.753341
NIO_UCSF_165353	1	3	1	0	astro	4	0	declined	female	46	2.88937	4.68268
NIO_UCSF_165353	2	0	1	0	astro	4	0	declined	female	46	-2.48646	-3.17225
NIO_UCSF_165353	3	3	1	0	astro	4	0	declined	female	46	3.54753	3.43726
NIO_UCSF_165353	4	2	1	0	astro	4	0	declined	female	46	2.11264	2.0931
NIO_UCSF_165353	5	2	1	0	astro	4	0	declined	female	46	2.22361	2.60696
NIO_UCSF_165353	6	0	1	0	astro	4	0	declined	female	46	-1.61463	-2.1572
NIO_UCSF_165353	7	0	1	0	astro	4	0	declined	female	46	-1.55513	-1.85078
NIO_UCSF_165353	8	1	1	0	astro	4	0	declined	female	46	-0.333912	-0.413577
NIO_UCSF_165353	9	0	1	0	astro	4	0	declined	female	46	-1.18398	-1.8501
NIO_UCSF_165353	10	1	1	0	astro	4	0	declined	female	46	-0.00241771	-0.986445
NIO_UCSF_166498	1	1	0	0	gbm	4	1	declined	male	56	-1.79673	-1.95881
NIO_UCSF_166498	2	1	0	0	gbm	4	1	declined	male	56	-0.0318525	0.667624
NIO_UCSF_166498	3	0	0	0	gbm	4	1	declined	male	56	-2.71279	-3.21207
NIO_UCSF_166498	4	2	0	0	gbm	4	1	declined	male	56	0.216804	-1.89169
NIO_UCSF_167596	2	3	1	0	astro	4	0	declined	female	65	3.04093	2.73197
NIO_UCSF_167596	3	3	1	0	astro	4	0	declined	female	65	3.54023	4.12911
NIO_UCSF_167596	9	3	1	0	astro	4	0	declined	female	65	3.82324	5.64698
NIO_UCSF_167596	10	3	1	0	astro	4	0	declined	female	65	3.89064	5.93226
NIO_UCSF_167596	5	3	1	0	astro	4	0	declined	female	65	3.67083	5.97034
NIO_UCSF_167596	6	3	1	0	astro	4	0	declined	female	65	4.15485	5.8677
NIO_UCSF_167596	11	3	1	0	astro	4	0	declined	female	65	3.74001	5.4183
NIO_UCSF_167596	1	3	1	0	astro	4	0	declined	female	65	3.18483	3.17061
NIO_UCSF_167596	4	2	1	0	astro	4	0	declined	female	65	0.0134449	0.152562
NIO_UCSF_167596	7	3	1	0	astro	4	0	declined	female	65	3.3326	5.20724
NIO_UCSF_167596	8	3	1	0	astro	4	0	declined	female	65	3.53699	5.44585
NIO_UCSF_168818	3	2	0	0	gbm	4	0	white	male	70	1.06924	1.81777
NIO_UCSF_168818	4	2	0	0	gbm	4	0	white	male	70	0.786807	1.20436
NIO_UCSF_168818	5	2	0	0	gbm	4	0	white	male	70	2.1958	2.35877
NIO_UCSF_168818	6	2	0	0	gbm	4	0	white	male	70	2.64937	2.77672
NIO_UCSF_168818	7	2	0	0	gbm	4	0	white	male	70	1.18519	1.50036
NIO_UCSF_168818	8	2	0	0	gbm	4	0	white	male	70	1.83763	1.86246
NIO_UCSF_170345	1	3	0	0	gbm	4	0	white	female	76	3.42219	1.90429
NIO_UCSF_170345	2	3	0	0	gbm	4	0	white	female	76	3.5824	1.95211
NIO_UCSF_170345	3	2	0	0	gbm	4	0	white	female	76	2.22846	1.87393
NIO_UCSF_170345	4	2	0	0	gbm	4	0	white	female	76	1.32393	-0.371346
NIO_UCSF_170345	5	3	0	0	gbm	4	0	white	female	76	3.05166	2.59762
NIO_UCSF_170345	6	1	0	0	gbm	4	0	white	female	76	0.628624	-0.459855
NIO_UCSF_170345	7	2	0	0	gbm	4	0	white	female	76	1.76483	0.530164
NIO_UCSF_17125	1	0	1	0	astro	1	0	white	male	67	-1.63441	-1.88204
NIO_UCSF_171814	8	2	1	0	astro	2	0	white	female	35	2.62773	1.63954
NIO_UCSF_171814	1	0	1	0	astro	2	0	white	female	35	-1.30402	-1.94942
NIO_UCSF_171814	2	0	1	0	astro	2	0	white	female	35	-2.04785	-2.79125
NIO_UCSF_171814	3	2	1	0	astro	2	0	white	female	35	1.17117	1.07193
NIO_UCSF_171814	4	1	1	0	astro	2	0	white	female	35	-1.52231	-2.0634
NIO_UCSF_171814	5	2	1	0	astro	2	0	white	female	35	3.23712	2.7583
NIO_UCSF_171814	6	2	1	0	astro	2	0	white	female	35	0.750533	0.652611
NIO_UCSF_171814	7	3	1	0	astro	2	0	white	female	35	3.71401	2.73358
NIO_UCSF_172433	5	0	1	0	astro	2	0	white	female	41	-0.887467	-1.73511
NIO_UCSF_172433	1	2	1	0	astro	2	0	white	female	41	2.5049	2.88806
NIO_UCSF_172433	2	2	1	0	astro	2	0	white	female	41	1.8705	1.81004
NIO_UCSF_172433	3	0	1	0	astro	2	0	white	female	41	-1.61408	-1.67386
NIO_UCSF_172433	4	0	1	0	astro	2	0	white	female	41	-0.877762	-1.34624
NIO_UCSF_172433	8	1	1	0	astro	2	0	white	female	41	-1.87351	-2.08525
NIO_UCSF_173244	1	2	1	0	astro	4	0	white	female	38	1.30835	1.28991
NIO_UCSF_173244	2	2	1	0	astro	4	0	white	female	38	0.547565	0.213113
NIO_UCSF_173244	6	2	1	0	astro	4	0	white	female	38	-1.89038	-2.38881
NIO_UCSF_173244	7	2	1	0	astro	4	0	white	female	38	3.13597	1.42975
NIO_UCSF_173244	8	3	1	0	astro	4	0	white	female	38	3.55377	2.4078
NIO_UCSF_173244	9	2	1	0	astro	4	0	white	female	38	-0.0111285	-0.295882
NIO_UCSF_173244	10	2	1	0	astro	4	0	white	female	38	-0.49092	-1.42387
NIO_UCSF_173244	11	2	1	0	astro	4	0	white	female	38	2.41529	1.60851
NIO_UCSF_173244	12	2	1	0	astro	4	0	white	female	38	1.18488	1.4431
NIO_UCSF_173244	13	3	1	0	astro	4	0	white	female	38	4.35193	4.25699
NIO_UCSF_173244	14	2	1	0	astro	4	0	white	female	38	0.65353	0.57665
NIO_UCSF_173244	15	2	1	0	astro	4	0	white	female	38	0.6239	0.919927
NIO_UCSF_173244	16	2	1	0	astro	4	0	white	female	38	-2.22154	-3.19639
NIO_UCSF_173244	17	2	1	0	astro	4	0	white	female	38	-1.21724	-2.03465
NIO_UCSF_174524	1	3	0	0	gbm	4	0	asian	female	41	3.52979	2.32229
NIO_UCSF_174524	2	3	0	0	gbm	4	0	asian	female	41	3.49988	2.08947
NIO_UCSF_174524	3	0	0	0	gbm	4	0	asian	female	41	-1.13016	-1.39793
NIO_UCSF_174524	4	0	0	0	gbm	4	0	asian	female	41	-0.245245	-0.832349
NIO_UCSF_17593	3	3	0	0	gbm	4	0	white	male	40	2.44777	3.45796
NIO_UCSF_17593	4	3	0	0	gbm	4	0	white	male	40	1.33178	0.0526629
NIO_UCSF_17593	1	0	0	0	gbm	4	0	white	male	40	-1.48567	-2.05151
NIO_UCSF_17593	2	1	0	0	gbm	4	0	white	male	40	-1.03257	-1.32666
NIO_UCSF_17593	5	3	0	0	gbm	4	0	white	male	40	0.968111	0.747512
NIO_UCSF_17593	6	0	0	0	gbm	4	0	white	male	40	1.43412	1.74461
NIO_UCSF_17593	7	0	0	0	gbm	4	0	white	male	40	0.102047	-0.187361
NIO_UCSF_17593	8	1	0	0	gbm	4	0	white	male	40	-0.291216	-0.726598
NIO_UCSF_17593	9	0	0	0	gbm	4	0	white	male	40	-0.867746	-1.39255
NIO_UCSF_176812	2	3	-1	1	oligo	2	0	white	male	58	3.1747	4.30246
NIO_UCSF_176812	5	3	-1	1	oligo	2	0	white	male	58	1.38738	2.9038
NIO_UCSF_176812	1	0	-1	1	oligo	2	0	white	male	58	-1.13476	-1.20761
NIO_UCSF_176812	3	3	-1	1	oligo	2	0	white	male	58	2.43014	2.45105
NIO_UCSF_176812	4	3	-1	1	oligo	2	0	white	male	58	2.99852	3.30318
NIO_UCSF_176812	6	0	-1	1	oligo	2	0	white	male	58	-0.703594	-1.00568
NIO_UCSF_176812	7	0	-1	1	oligo	2	0	white	male	58	-1.04514	-1.00983
NIO_UCSF_176812	9	0	-1	1	oligo	2	0	white	male	58	-0.924574	-1.07747
NIO_UCSF_176812	10	0	-1	1	oligo	2	0	white	male	58	-1.0105	-1.053
NIO_UCSF_176812	11	0	-1	1	oligo	2	0	white	male	58	-1.58334	-2.09733
NIO_UCSF_176812	12	0	-1	1	oligo	2	0	white	male	58	-1.48025	-1.44213
NIO_UCSF_176812	8	0	-1	1	oligo	2	0	white	male	58	-0.223199	-0.109076
NIO_UCSF_1771257	1	3	0	0	gbm	4	0	native american or alaskan native	female	61	3.93726	3.24794
NIO_UCSF_1771257	2	2	0	0	gbm	4	0	native american or alaskan native	female	61	0.838236	1.06008
NIO_UCSF_1771257	3	2	0	0	gbm	4	0	native american or alaskan native	female	61	1.42091	1.64195
NIO_UCSF_1771257	4	2	0	0	gbm	4	0	native american or alaskan native	female	61	1.43664	1.59504
NIO_UCSF_1771257	5	0	0	0	gbm	4	0	native american or alaskan native	female	61	-0.528365	-0.310889
NIO_UCSF_1771257	6	0	0	0	gbm	4	0	native american or alaskan native	female	61	-1.76374	-2.5043
NIO_UCSF_1771257	7	0	0	0	gbm	4	0	native american or alaskan native	female	61	-0.220597	-0.412532
NIO_UCSF_178117	1	2	0	0	gbm	4	0	white	male	55	0.919372	1.48786
NIO_UCSF_178117	2	2	0	0	gbm	4	0	white	male	55	-0.338793	0.447368
NIO_UCSF_178117	13	2	0	0	gbm	4	0	white	male	55	0.142588	-0.326698
NIO_UCSF_178117	3	0	0	0	gbm	4	0	white	male	55	-1.81451	-2.39165
NIO_UCSF_178117	4	2	0	0	gbm	4	0	white	male	55	0.176726	-0.354897
NIO_UCSF_178117	5	2	0	0	gbm	4	0	white	male	55	-0.168295	-0.162922
NIO_UCSF_178117	6	0	0	0	gbm	4	0	white	male	55	-1.67435	-1.63423
NIO_UCSF_178117	7	3	0	0	gbm	4	0	white	male	55	1.69996	0.698264
NIO_UCSF_178117	8	0	0	0	gbm	4	0	white	male	55	-0.731169	-1.27579
NIO_UCSF_178117	9	0	0	0	gbm	4	0	white	male	55	-0.837291	-1.79376
NIO_UCSF_178117	10	2	0	0	gbm	4	0	white	male	55	0.0509659	-0.245798
NIO_UCSF_178117	11	0	0	0	gbm	4	0	white	male	55	-0.989236	-1.34349
NIO_UCSF_178117	12	2	0	0	gbm	4	0	white	male	55	-1.10171	-1.33659
NIO_UCSF_179469	1	2	1	1	oligo	3	1	white	male	52	1.11351	1.39523
NIO_UCSF_179469	2	3	1	1	oligo	3	1	white	male	52	2.35587	2.63549
NIO_UCSF_179469	3	3	1	1	oligo	3	1	white	male	52	2.03038	2.28911
NIO_UCSF_179469	4	3	1	1	oligo	3	1	white	male	52	2.33822	2.42472
NIO_UCSF_179469	5	2	1	1	oligo	3	1	white	male	52	0.50304	0.972655
NIO_UCSF_179469	6	0	1	1	oligo	3	1	white	male	52	-1.52028	-1.15019
NIO_UCSF_179469	7	2	1	1	oligo	3	1	white	male	52	-0.262941	-0.755337
NIO_UCSF_179469	8	2	1	1	oligo	3	1	white	male	52	0.674436	0.0398652
NIO_UCSF_179469	9	2	1	1	oligo	3	1	white	male	52	-0.381756	-1.25501
NIO_UCSF_179469	10	2	1	1	oligo	3	1	white	male	52	0.0363593	-0.135078
NIO_UCSF_179469	11	0	1	1	oligo	3	1	white	male	52	0.112083	0.445454
NIO_UCSF_179469	12	2	1	1	oligo	3	1	white	male	52	0.980912	0.851497
NIO_UCSF_179469	13	2	1	1	oligo	3	1	white	male	52	-0.649961	-1.58714
NIO_UCSF_179469	14	2	1	1	oligo	3	1	white	male	52	1.28151	1.32541
NIO_UCSF_180426	3	2	1	1	oligo	2	0	other	male	65	0.170085	0.67655
NIO_UCSF_180426	4	2	1	1	oligo	2	0	other	male	65	1.14418	0.499544
NIO_UCSF_180426	1	2	1	1	oligo	2	0	other	male	65	-2.03103	-2.15499
NIO_UCSF_180426	2	1	1	1	oligo	2	0	other	male	65	-1.55883	-2.15966
NIO_UCSF_180426	5	0	1	1	oligo	2	0	other	male	65	-0.990653	-0.9324
NIO_UCSF_180426	6	0	1	1	oligo	2	0	other	male	65	-0.707043	-0.647465
NIO_UCSF_180426	7	0	1	1	oligo	2	0	other	male	65	-0.481329	-0.6238
NIO_UCSF_180426	8	2	1	1	oligo	2	0	other	male	65	0.0515175	0.0239229
NIO_UCSF_180426	9	0	1	1	oligo	2	0	other	male	65	-1.93441	-1.68951
NIO_UCSF_180426	10	0	1	1	oligo	2	0	other	male	65	-1.1711	-1.67302
NIO_UCSF_180426	11	0	1	1	oligo	2	0	other	male	65	-0.906564	-1.15898
NIO_UCSF_181474	8	0	1	0	astro	2	0	white	female	35	-1.09459	-0.872804
NIO_UCSF_181474	1	3	1	0	astro	2	0	white	female	35	2.45787	4.01404
NIO_UCSF_181474	2	2	1	0	astro	2	0	white	female	35	2.53132	3.45245
NIO_UCSF_181474	6	0	1	0	astro	2	0	white	female	35	-0.274471	0.0590055
NIO_UCSF_181474	7	0	1	0	astro	2	0	white	female	35	-1.53284	-0.863021
NIO_UCSF_181474	3	2	1	0	astro	2	0	white	female	35	2.27733	3.11851
NIO_UCSF_181474	4	0	1	0	astro	2	0	white	female	35	-0.855475	-0.794853
NIO_UCSF_181474	5	0	1	0	astro	2	0	white	female	35	0.413562	1.46911
NIO_UCSF_18179	10	2	0	0	gbm	4	0	white	male	61	-0.338996	0.102604
NIO_UCSF_18179	3	3	0	0	gbm	4	0	white	male	61	1.44177	1.48864
NIO_UCSF_18179	11	3	0	0	gbm	4	0	white	male	61	2.95897	2.65689
NIO_UCSF_18179	13	3	0	0	gbm	4	0	white	male	61	3.85165	2.64609
NIO_UCSF_18179	12	2	0	0	gbm	4	0	white	male	61	-0.242539	0.0194172
NIO_UCSF_18179	9	1	0	0	gbm	4	0	white	male	61	0.352305	0.90242
NIO_UCSF_18179	1	2	0	0	gbm	4	0	white	male	61	1.98668	2.34598
NIO_UCSF_18179	5	2	0	0	gbm	4	0	white	male	61	1.69237	1.42021
NIO_UCSF_18179	2	2	0	0	gbm	4	0	white	male	61	2.26677	2.26396
NIO_UCSF_18179	8	2	0	0	gbm	4	0	white	male	61	0.448088	0.109928
NIO_UCSF_18179	6	2	0	0	gbm	4	0	white	male	61	2.43811	2.73026
NIO_UCSF_18179	7	3	0	0	gbm	4	0	white	male	61	3.15673	3.12203
NIO_UCSF_182850	1	3	0	0	gbm	4	0	white	male	53	3.45404	3.33898
NIO_UCSF_183301	1	3	1	0	astro	4	1	white	female	42	2.74253	1.6908
NIO_UCSF_183301	2	3	1	0	astro	4	1	white	female	42	2.28343	1.08632
NIO_UCSF_183301	3	3	1	0	astro	4	1	white	female	42	2.60593	1.58777
NIO_UCSF_183301	4	1	1	0	astro	4	1	white	female	42	0.843317	1.95636
NIO_UCSF_183301	5	0	1	0	astro	4	1	white	female	42	-0.205191	0.261647
NIO_UCSF_183301	7	0	1	0	astro	4	1	white	female	42	-1.04299	-1.42074
NIO_UCSF_183301	8	2	1	0	astro	4	1	white	female	42	1.2743	1.38328
NIO_UCSF_189497	1	2	0	0	gbm	4	1	white	male	48	0.675483	-0.434623
NIO_UCSF_189497	2	3	0	0	gbm	4	1	white	male	48	1.74978	-0.48186
NIO_UCSF_189497	3	2	0	0	gbm	4	1	white	male	48	1.19284	0.947657
NIO_UCSF_189497	4	2	0	0	gbm	4	1	white	male	48	-0.461993	-0.961185
NIO_UCSF_189497	5	0	0	0	gbm	4	1	white	male	48	-1.65313	-1.90364
NIO_UCSF_189497	6	2	0	0	gbm	4	1	white	male	48	1.47006	0.48104
NIO_UCSF_189497	7	1	0	0	gbm	4	1	white	male	48	-1.68124	-1.92508
NIO_UCSF_189497	8	2	0	0	gbm	4	1	white	male	48	1.44557	1.24604
NIO_UCSF_189497	9	2	0	0	gbm	4	1	white	male	48	-0.0273105	-0.599845
NIO_UCSF_189497	10	3	0	0	gbm	4	1	white	male	48	1.65511	1.45453
NIO_UCSF_189497	11	3	0	0	gbm	4	1	white	male	48	2.21687	1.86999
NIO_UCSF_190864	1	3	0	0	gbm	4	1	white	male	70	1.48244	1.99225
NIO_UCSF_190864	2	3	0	0	gbm	4	1	white	male	70	1.60482	1.91996
NIO_UCSF_190864	3	0	0	0	gbm	4	1	white	male	70	0.149401	0.970317
NIO_UCSF_190864	4	2	0	0	gbm	4	1	white	male	70	0.857084	0.927993
NIO_UCSF_190864	5	2	0	0	gbm	4	1	white	male	70	-0.781285	-1.33818
NIO_UCSF_190864	6	3	0	0	gbm	4	1	white	male	70	1.56776	1.87957
NIO_UCSF_191784	1	3	0	0	gbm	4	1	asian	female	61	0.81901	-0.292784
NIO_UCSF_191784	2	3	0	0	gbm	4	1	asian	female	61	2.74662	-0.364824
NIO_UCSF_191784	3	2	0	0	gbm	4	1	asian	female	61	-0.631154	-1.28744
NIO_UCSF_191784	4	3	0	0	gbm	4	1	asian	female	61	-0.709647	-1.15131
NIO_UCSF_191784	5	3	0	0	gbm	4	1	asian	female	61	1.28433	2.44603
NIO_UCSF_191784	6	3	0	0	gbm	4	1	asian	female	61	1.18858	1.44955
NIO_UCSF_191784	7	2	0	0	gbm	4	1	asian	female	61	0.462155	0.451653
NIO_UCSF_192968	1	1	1	0	astro	2	0	white	male	29	-1.30017	-1.52446
NIO_UCSF_192968	2	3	1	0	astro	2	0	white	male	29	3.73053	3.51083
NIO_UCSF_192968	3	2	1	0	astro	2	0	white	male	29	0.446816	0.928088
NIO_UCSF_192968	4	2	1	0	astro	2	0	white	male	29	-0.362212	0.114157
NIO_UCSF_192968	5	2	1	0	astro	2	0	white	male	29	-0.323671	-0.180144
NIO_UCSF_192968	6	0	1	0	astro	2	0	white	male	29	-1.11567	-1.10676
NIO_UCSF_192968	7	0	1	0	astro	2	0	white	male	29	-1.86192	-1.52529
NIO_UCSF_19383	1	2	0	0	gbm	4	0	white	female	43	0.422094	-0.00414418
NIO_UCSF_19383	2	3	0	0	gbm	4	0	white	female	43	0.642983	-0.747134
NIO_UCSF_19383	3	3	0	0	gbm	4	0	white	female	43	3.00587	2.41485
NIO_UCSF_19383	4	3	0	0	gbm	4	0	white	female	43	3.15567	3.36052
NIO_UCSF_19383	5	2	0	0	gbm	4	0	white	female	43	0.28218	0.792011
NIO_UCSF_19383	6	0	0	0	gbm	4	0	white	female	43	-1.50869	-1.99847
NIO_UCSF_19383	7	3	0	0	gbm	4	0	white	female	43	1.77583	2.27179
NIO_UCSF_19383	8	2	0	0	gbm	4	0	white	female	43	-0.504792	0.439038
NIO_UCSF_197741	1	0	0	0	gbm	4	1	white	male	47	-2.21881	-2.44326
NIO_UCSF_197741	2	0	0	0	gbm	4	1	white	male	47	-1.86086	-2.05632
NIO_UCSF_197741	3	2	0	0	gbm	4	1	white	male	47	-0.176654	-0.628167
NIO_UCSF_197741	4	2	0	0	gbm	4	1	white	male	47	-0.834257	-1.14131
NIO_UCSF_197741	5	2	0	0	gbm	4	1	white	male	47	-2.05528	-2.00149
NIO_UCSF_197741	6	2	0	0	gbm	4	1	white	male	47	-1.22533	-1.70224
NIO_UCSF_197741	7	3	0	0	gbm	4	1	white	male	47	2.88817	1.53346
NIO_UCSF_197741	8	3	0	0	gbm	4	1	white	male	47	4.11441	3.89277
NIO_UCSF_197741	9	3	0	0	gbm	4	1	white	male	47	3.87118	3.34229
NIO_UCSF_197741	10	2	0	0	gbm	4	1	white	male	47	-0.819151	-0.805158
NIO_UCSF_197741	11	2	0	0	gbm	4	1	white	male	47	0.611077	0.425146
NIO_UCSF_197741	12	2	0	0	gbm	4	1	white	male	47	3.44448	1.6321
NIO_UCSF_197741	13	3	0	0	gbm	4	1	white	male	47	3.06539	2.90824
NIO_UCSF_197741	14	2	0	0	gbm	4	1	white	male	47	1.12536	1.36471
NIO_UCSF_21342	1	0	0	0	gbm	2	0	white	female	60	-1.16494	-1.06187
NIO_UCSF_21342	2	3	0	0	gbm	2	0	white	female	60	2.63854	3.08076
NIO_UCSF_21342	3	1	0	0	gbm	2	0	white	female	60	2.54019	3.0647
NIO_UCSF_21342	4	1	0	0	gbm	2	0	white	female	60	3.17505	3.34185
NIO_UCSF_21342	5	2	0	0	gbm	2	0	white	female	60	2.6	1.99728
NIO_UCSF_21342	6	2	0	0	gbm	2	0	white	female	60	0.869753	1.49245
NIO_UCSF_21342	7	2	0	0	gbm	2	0	white	female	60	-0.353911	-0.88483
NIO_UCSF_21342	8	3	0	0	gbm	2	0	white	female	60	0.728888	-0.00917872
NIO_UCSF_21342	9	3	0	0	gbm	2	0	white	female	60	1.73203	1.04902
NIO_UCSF_23403	6	2	1	0	astro	4	0	white	female	51	3.30391	1.00436
NIO_UCSF_23403	7	2	1	0	astro	4	0	white	female	51	2.8168	0.570536
NIO_UCSF_23403	8	2	1	0	astro	4	0	white	female	51	2.38072	3.81812
NIO_UCSF_23403	9	2	1	0	astro	4	0	white	female	51	1.96394	1.7657
NIO_UCSF_23403	10	2	1	0	astro	4	0	white	female	51	2.26371	2.30455
NIO_UCSF_23403	11	2	1	0	astro	4	0	white	female	51	1.4611	1.70838
NIO_UCSF_2427	1	3	0	0	gbm	4	1	white	male	32	0.989532	0.879587
NIO_UCSF_25642	1	0	1	0	astro	4	1	black or african american	male	52	-1.93774	-1.78756
NIO_UCSF_25642	2	0	1	0	astro	4	1	black or african american	male	52	-1.88342	-1.82988
NIO_UCSF_25642	3	3	1	0	astro	4	1	black or african american	male	52	3.92368	5.63913
NIO_UCSF_25642	4	2	1	0	astro	4	1	black or african american	male	52	-0.499277	0.738077
NIO_UCSF_25642	5	2	1	0	astro	4	1	black or african american	male	52	-0.672665	-0.0301061
NIO_UCSF_25642	6	2	1	0	astro	4	1	black or african american	male	52	0.359789	0.771213
NIO_UCSF_26162	1	2	0	0	gbm	4	0	native american or alaskan native/ white	female	58	-0.564307	-1.57058
NIO_UCSF_26162	2	2	0	0	gbm	4	0	native american or alaskan native/ white	female	58	-0.208613	-1.26161
NIO_UCSF_26162	3	1	0	0	gbm	4	0	native american or alaskan native/ white	female	58	3.09265	2.49411
NIO_UCSF_26162	4	3	0	0	gbm	4	0	native american or alaskan native/ white	female	58	3.98568	3.42653
NIO_UCSF_26162	5	2	0	0	gbm	4	0	native american or alaskan native/ white	female	58	-0.761337	-1.49178
NIO_UCSF_27254	1	3	0	0	gbm	4	0	unknown	male	71	1.61932	2.11434
NIO_UCSF_27254	2	3	0	0	gbm	4	0	unknown	male	71	2.15012	1.77147
NIO_UCSF_27254	3	2	0	0	gbm	4	0	unknown	male	71	1.61803	3.12836
NIO_UCSF_27254	4	2	0	0	gbm	4	0	unknown	male	71	1.69745	3.05508
NIO_UCSF_27254	5	3	0	0	gbm	4	0	unknown	male	71	2.94058	2.25988
NIO_UCSF_27254	6	2	0	0	gbm	4	0	unknown	male	71	4.00387	2.86726
NIO_UCSF_27254	7	1	0	0	gbm	4	0	unknown	male	71	-0.206118	0.700172
NIO_UCSF_27254	9	0	0	0	gbm	4	0	unknown	male	71	-0.126347	0.412359
NIO_UCSF_29302	1	3	0	0	gbm	4	0	white	male	67	3.41746	3.59661
NIO_UCSF_29302	2	3	0	0	gbm	4	0	white	male	67	3.01892	1.72531
NIO_UCSF_30_2781	1	3	1	0	astro	4	1	white	male	52	2.97508	1.4715
NIO_UCSF_30_2781	2	3	1	0	astro	4	1	white	male	52	3.4298	1.73965
NIO_UCSF_30_2781	3	3	1	0	astro	4	1	white	male	52	2.44378	2.86583
NIO_UCSF_30_2781	6	3	1	0	astro	4	1	white	male	52	3.40799	2.83519
NIO_UCSF_30_2781	4	3	1	0	astro	4	1	white	male	52	3.20898	3.43885
NIO_UCSF_30_2781	5	3	1	0	astro	4	1	white	male	52	3.3198	3.83092
NIO_UCSF_30_2781	7	3	1	0	astro	4	1	white	male	52	3.57269	4.37088
NIO_UCSF_36138	4	3	0	0	gbm	4	0	asian	male	47	2.14733	3.32682
NIO_UCSF_3833	1	0	-1	-1	circ	1	0	white	male	22	-1.60872	-1.52242
NIO_UCSF_3833	2	0	-1	-1	circ	1	0	white	male	22	-1.6408	-1.57466
NIO_UCSF_3833	3	1	-1	-1	circ	1	0	white	male	22	-1.45834	-1.60732
NIO_UCSF_3833	4	1	-1	-1	circ	1	0	white	male	22	-1.54055	-1.58802
NIO_UCSF_3833	5	1	-1	-1	circ	1	0	white	male	22	1.28629	1.89587
NIO_UCSF_3833	6	3	-1	-1	circ	1	0	white	male	22	-0.626861	-0.293343
NIO_UCSF_3833	7	2	-1	-1	circ	1	0	white	male	22	-0.860803	-0.429403
NIO_UCSF_3833	8	3	-1	-1	circ	1	0	white	male	22	3.21008	2.10364
NIO_UCSF_3833	9	1	-1	-1	circ	1	0	white	male	22	1.17575	-0.688588
NIO_UCSF_3833	10	3	-1	-1	circ	1	0	white	male	22	1.72959	2.64848
NIO_UCSF_40823	10	2	0	0	gbm	4	0	white	female	75	0.506939	1.44861
NIO_UCSF_40823	2	3	0	0	gbm	4	0	white	female	75	2.69634	1.83294
NIO_UCSF_40823	3	3	0	0	gbm	4	0	white	female	75	3.94877	2.95247
NIO_UCSF_40823	4	0	0	0	gbm	4	0	white	female	75	-0.213828	-0.824798
NIO_UCSF_40823	5	3	0	0	gbm	4	0	white	female	75	3.0183	3.42379
NIO_UCSF_40823	6	3	0	0	gbm	4	0	white	female	75	2.20997	1.47201
NIO_UCSF_40823	7	3	0	0	gbm	4	0	white	female	75	4.08922	6.0904
NIO_UCSF_40823	9	2	0	0	gbm	4	0	white	female	75	-0.246143	0.363269
NIO_UCSF_40823	11	2	0	0	gbm	4	0	white	female	75	-0.164244	-0.0733999
NIO_UCSF_40823	8	0	0	0	gbm	4	0	white	female	75	-0.471437	0.47624
NIO_UCSF_40823	12	1	0	0	gbm	4	0	white	female	75	-0.465375	-0.0326892
NIO_UCSF_40823	1	0	0	0	gbm	4	0	white	female	75	-1.07613	-1.17254
NIO_UCSF_41471	1	0	0	0	gbm	4	0	white	male	48	-1.33814	-1.62614
NIO_UCSF_41471	2	3	0	0	gbm	4	0	white	male	48	2.90784	2.54843
NIO_UCSF_41471	3	0	0	0	gbm	4	0	white	male	48	-1.09118	-1.24587
NIO_UCSF_41471	4	0	0	0	gbm	4	0	white	male	48	-0.559846	-0.681092
NIO_UCSF_42790	4	2	1	1	oligo	2	0	white	female	38	2.43086	2.46489
NIO_UCSF_42790	5	2	1	1	oligo	2	0	white	female	38	1.32364	1.67577
NIO_UCSF_42790	6	1	1	1	oligo	2	0	white	female	38	-1.62994	-0.996869
NIO_UCSF_42790	7	1	1	1	oligo	2	0	white	female	38	-0.786568	-0.0338871
NIO_UCSF_42790	8	3	1	1	oligo	2	0	white	female	38	2.80979	3.48305
NIO_UCSF_42790	1	3	1	1	oligo	2	0	white	female	38	2.8313	5.26038
NIO_UCSF_42790	2	3	1	1	oligo	2	0	white	female	38	2.9456	5.15806
NIO_UCSF_42790	3	1	1	1	oligo	2	0	white	female	38	-0.614038	-0.377923
NIO_UCSF_4392	5	1	1	0	astro	2	0	native american or alaskan native	female	73	0.040706	-0.506661
NIO_UCSF_4392	6	1	1	0	astro	2	0	native american or alaskan native	female	73	-1.12709	-1.87688
NIO_UCSF_4392	7	0	1	0	astro	2	0	native american or alaskan native	female	73	-1.01283	-1.21215
NIO_UCSF_4392	8	2	1	0	astro	2	0	native american or alaskan native	female	73	-0.780665	-0.864874
NIO_UCSF_4392	9	1	1	0	astro	2	0	native american or alaskan native	female	73	-0.779998	-0.947558
NIO_UCSF_4392	3	3	1	0	astro	2	0	native american or alaskan native	female	73	2.65165	3.25999
NIO_UCSF_4392	4	2	1	0	astro	2	0	native american or alaskan native	female	73	0.883943	0.765297
NIO_UCSF_4392	1	3	1	0	astro	2	0	native american or alaskan native	female	73	1.68698	2.09355
NIO_UCSF_4392	2	3	1	0	astro	2	0	native american or alaskan native	female	73	1.38987	2.35861
NIO_UCSF_44172	1	3	1	0	astro	2	1	asian	female	53	2.95394	2.63609
NIO_UCSF_44172	7	2	1	0	astro	2	1	asian	female	53	0.233157	0.981319
NIO_UCSF_44172	6	2	1	0	astro	2	1	asian	female	53	-1.00783	-0.584142
NIO_UCSF_44172	5	3	1	0	astro	2	1	asian	female	53	1.90927	3.96539
NIO_UCSF_44172	2	3	1	0	astro	2	1	asian	female	53	2.56431	1.56025
NIO_UCSF_44172	3	3	1	0	astro	2	1	asian	female	53	3.24252	2.92908
NIO_UCSF_45948	1	3	-1	-1	circ	1	0	white	female	28	0.439409	-0.196123
NIO_UCSF_45948	2	1	-1	-1	circ	1	0	white	female	28	0.0509651	-0.660465
NIO_UCSF_45948	3	2	-1	-1	circ	1	0	white	female	28	-0.213703	-0.783931
NIO_UCSF_45948	4	2	-1	-1	circ	1	0	white	female	28	-1.20159	-1.76108
NIO_UCSF_45948	5	0	-1	-1	circ	1	0	white	female	28	-1.85389	-1.98562
NIO_UCSF_45948	6	1	-1	-1	circ	1	0	white	female	28	-1.00197	-1.87389
NIO_UCSF_4723	1	2	1	0	astro	4	1	white	male	25	2.08573	0.552991
NIO_UCSF_4723	2	2	1	0	astro	4	1	white	male	25	-0.637319	-1.8149
NIO_UCSF_4723	3	3	1	0	astro	4	1	white	male	25	4.39056	3.75103
NIO_UCSF_4723	4	3	1	0	astro	4	1	white	male	25	4.06777	3.67381
NIO_UCSF_4723	5	3	1	0	astro	4	1	white	male	25	3.66026	1.37447
NIO_UCSF_4723	6	2	1	0	astro	4	1	white	male	25	2.43345	1.03025
NIO_UCSF_4723	7	2	1	0	astro	4	1	white	male	25	0.849287	0.365886
NIO_UCSF_49407	1	2	1	1	oligo	3	1	white	female	55	0.740086	-0.885862
NIO_UCSF_49407	2	3	1	1	oligo	3	1	white	female	55	0.0919935	-3.06687
NIO_UCSF_49407	3	1	1	1	oligo	3	1	white	female	55	-0.334032	-1.91955
NIO_UCSF_49407	4	3	1	1	oligo	3	1	white	female	55	1.39137	1.37482
NIO_UCSF_49407	5	3	1	1	oligo	3	1	white	female	55	1.37481	0.805314
NIO_UCSF_49407	6	0	1	1	oligo	3	1	white	female	55	-1.24365	-2.25765
NIO_UCSF_49407	7	0	1	1	oligo	3	1	white	female	55	-1.40687	-2.75215
NIO_UCSF_49407	8	3	1	1	oligo	3	1	white	female	55	3.45347	1.81363
NIO_UCSF_49407	9	3	1	1	oligo	3	1	white	female	55	4.18991	1.85913
NIO_UCSF_50892	1	3	0	0	gbm	-1	0	white	male	60	2.52714	2.98286
NIO_UCSF_50892	2	3	0	0	gbm	-1	0	white	male	60	2.21243	2.75311
NIO_UCSF_52273	1	0	0	0	gbm	4	0	white	female	55	-0.730647	-0.477944
NIO_UCSF_52273	2	0	0	0	gbm	4	0	white	female	55	-0.875546	-0.828389
NIO_UCSF_52273	9	3	0	0	gbm	4	0	white	female	55	2.57021	2.14845
NIO_UCSF_52273	3	2	0	0	gbm	4	0	white	female	55	-1.65958	-1.67029
NIO_UCSF_52273	4	1	0	0	gbm	4	0	white	female	55	-1.77465	-2.82857
NIO_UCSF_52273	5	2	0	0	gbm	4	0	white	female	55	-0.732626	-0.419709
NIO_UCSF_52273	6	0	0	0	gbm	4	0	white	female	55	-1.1152	-0.477714
NIO_UCSF_52273	7	1	0	0	gbm	4	0	white	female	55	-2.5968	-2.75286
NIO_UCSF_52273	8	1	0	0	gbm	4	0	white	female	55	0.491227	0.58182
NIO_UCSF_55237	2	2	0	-1	circ	1	0	white	male	38	0.722443	1.25548
NIO_UCSF_55237	3	0	0	-1	circ	1	0	white	male	38	-1.75051	-1.66042
NIO_UCSF_55237	5	3	0	-1	circ	1	0	white	male	38	3.27353	2.5493
NIO_UCSF_55237	6	3	0	-1	circ	1	0	white	male	38	3.57208	2.99173
NIO_UCSF_55237	1	1	0	-1	circ	1	0	white	male	38	-1.06398	-1.03138
NIO_UCSF_58562	3	3	1	0	astro	3	1	declined	female	33	3.95341	2.92308
NIO_UCSF_58562	5	2	1	0	astro	3	1	declined	female	33	0.524861	0.99919
NIO_UCSF_58562	7	0	1	0	astro	3	1	declined	female	33	-0.79688	-0.814779
NIO_UCSF_58562	6	2	1	0	astro	3	1	declined	female	33	0.493727	0.676715
NIO_UCSF_58562	1	0	1	0	astro	3	1	declined	female	33	-0.385848	-0.13059
NIO_UCSF_58562	2	0	1	0	astro	3	1	declined	female	33	-0.52808	-0.273442
NIO_UCSF_58562	4	2	1	0	astro	3	1	declined	female	33	2.19823	2.45006
NIO_UCSF_60473	1	3	0	0	gbm	4	0	asian	male	60	1.74632	1.62641
NIO_UCSF_60473	2	3	0	0	gbm	4	0	asian	male	60	3.29433	3.30383
NIO_UCSF_60473	3	0	0	0	gbm	4	0	asian	male	60	-0.447	-0.755134
NIO_UCSF_60473	4	0	0	0	gbm	4	0	asian	male	60	-0.8615	-1.50369
NIO_UCSF_60473	5	2	0	0	gbm	4	0	asian	male	60	-1.38376	-2.00497
NIO_UCSF_60473	6	3	0	0	gbm	4	0	asian	male	60	1.11081	0.931444
NIO_UCSF_60473	7	3	0	0	gbm	4	0	asian	male	60	1.98484	2.75996
NIO_UCSF_60473	8	2	0	0	gbm	4	0	asian	male	60	1.55614	2.06565
NIO_UCSF_60473	9	0	0	0	gbm	4	0	asian	male	60	-0.565043	-0.272347
NIO_UCSF_63756	1	0	0	0	gbm	4	1	white	male	63	-2.0209	-2.17177
NIO_UCSF_63756	2	3	0	0	gbm	4	1	white	male	63	4.13821	2.96883
NIO_UCSF_63756	3	2	0	0	gbm	4	1	white	male	63	3.56761	3.08198
NIO_UCSF_63756	4	0	0	0	gbm	4	1	white	male	63	-0.640838	-0.585314
NIO_UCSF_63756	5	2	0	0	gbm	4	1	white	male	63	0.486848	0.811867
NIO_UCSF_63756	6	2	0	0	gbm	4	1	white	male	63	-1.38052	-1.42494
NIO_UCSF_63756	7	2	0	0	gbm	4	1	white	male	63	0.28075	0.494923
NIO_UCSF_64492	3	3	1	0	astro	3	0	white	female	29	4.11885	4.02428
NIO_UCSF_64492	4	3	1	0	astro	3	0	white	female	29	4.20275	4.52422
NIO_UCSF_64492	6	2	1	0	astro	3	0	white	female	29	0.388125	1.16221
NIO_UCSF_64492	7	2	1	0	astro	3	0	white	female	29	0.399956	1.1189
NIO_UCSF_64492	5	2	1	0	astro	3	0	white	female	29	-0.0256456	0.508577
NIO_UCSF_64492	1	3	1	0	astro	3	0	white	female	29	3.13464	3.35384
NIO_UCSF_64492	2	3	1	0	astro	3	0	white	female	29	3.02301	3.00277
NIO_UCSF_6550	1	3	1	0	astro	4	1	asian	male	43	3.05835	1.91853
NIO_UCSF_6550	2	2	1	0	astro	4	1	asian	male	43	-0.215114	-1.64641
NIO_UCSF_6550	3	2	1	0	astro	4	1	asian	male	43	0.4545	0.741871
NIO_UCSF_6550	4	2	1	0	astro	4	1	asian	male	43	0.909245	1.61887
NIO_UCSF_6550	5	1	1	0	astro	4	1	asian	male	43	-0.609236	-1.19363
NIO_UCSF_6550	6	2	1	0	astro	4	1	asian	male	43	-0.509237	-0.709546
NIO_UCSF_6550	7	1	1	0	astro	4	1	asian	male	43	-0.761704	-1.15882
NIO_UCSF_6550	8	2	1	0	astro	4	1	asian	male	43	0.656329	0.880564
NIO_UCSF_6550	9	2	1	0	astro	4	1	asian	male	43	-0.516693	-0.65374
NIO_UCSF_65823	1	2	0	0	gbm	2	0	white	male	51	0.251036	0.462543
NIO_UCSF_66486	6	2	1	0	astro	2	1	white	male	40	1.16883	2.59008
NIO_UCSF_66486	8	3	1	0	astro	2	1	white	male	40	1.04304	2.30415
NIO_UCSF_66486	2	3	1	0	astro	2	1	white	male	40	2.17734	3.48108
NIO_UCSF_66486	3	3	1	0	astro	2	1	white	male	40	3.01164	3.0478
NIO_UCSF_66486	4	3	1	0	astro	2	1	white	male	40	2.75717	3.31874
NIO_UCSF_66486	5	0	1	0	astro	2	1	white	male	40	-1.74334	-1.41725
NIO_UCSF_66486	7	0	1	0	astro	2	1	white	male	40	-2.08273	-2.33422
NIO_UCSF_66486	1	2	1	0	astro	2	1	white	male	40	0.360305	0.800937
NIO_UCSF_68360	2	3	0	0	gbm	4	1	black or african american	male	64	1.9847	2.71799
NIO_UCSF_68360	1	2	0	0	gbm	4	1	black or african american	male	64	-1.80644	-2.50717
NIO_UCSF_68360	3	0	0	0	gbm	4	1	black or african american	male	64	-0.947347	-1.35587
NIO_UCSF_68360	4	1	0	0	gbm	4	1	black or african american	male	64	0.357787	0.272834
NIO_UCSF_68360	5	3	0	0	gbm	4	1	black or african american	male	64	4.2743	4.04334
NIO_UCSF_69567	2	3	0	0	gbm	4	1	asian	female	45	2.4671	2.36328
NIO_UCSF_69567	3	1	0	0	gbm	4	1	asian	female	45	0.339344	-0.50087
NIO_UCSF_69567	4	1	0	0	gbm	4	1	asian	female	45	-0.282929	-0.929481
NIO_UCSF_69567	1	3	0	0	gbm	4	1	asian	female	45	2.76349	2.10355
NIO_UCSF_70288	1	0	-1	-1	circ	1	0	other	male	43	-1.52094	-2.34106
NIO_UCSF_70288	4	0	-1	-1	circ	1	0	other	male	43	-2.13296	-2.50906
NIO_UCSF_70288	2	0	-1	-1	circ	1	0	other	male	43	-2.27946	-2.63457
NIO_UCSF_70288	3	0	-1	-1	circ	1	0	other	male	43	-1.47448	-1.95448
NIO_UCSF_71447	2	3	0	0	gbm	4	0	white	male	74	4.05725	4.77341
NIO_UCSF_72131	1	2	1	0	astro	4	1	white	female	46	-0.831817	-0.966248
NIO_UCSF_72131	2	2	1	0	astro	4	1	white	female	46	-1.51691	-1.66125
NIO_UCSF_72131	3	2	1	0	astro	4	1	white	female	46	1.359	1.66562
NIO_UCSF_72131	4	2	1	0	astro	4	1	white	female	46	-0.427703	-0.862501
NIO_UCSF_72131	5	2	1	0	astro	4	1	white	female	46	-0.557077	-0.630417
NIO_UCSF_72131	6	2	1	0	astro	4	1	white	female	46	2.4622	2.1267
NIO_UCSF_72131	7	2	1	0	astro	4	1	white	female	46	0.73079	0.926129
NIO_UCSF_7399	5	2	-1	1	oligo	3	1	white	male	39	-0.874524	-0.849893
NIO_UCSF_7399	2	3	-1	1	oligo	3	1	white	male	39	4.00285	0.86544
NIO_UCSF_7399	4	0	-1	1	oligo	3	1	white	male	39	-0.876922	-1.04825
NIO_UCSF_7399	6	2	-1	1	oligo	3	1	white	male	39	-1.23916	-1.12489
NIO_UCSF_7399	7	2	-1	1	oligo	3	1	white	male	39	-0.809735	-0.347583
NIO_UCSF_7399	1	2	-1	1	oligo	3	1	white	male	39	0.879401	1.17293
NIO_UCSF_7399	3	1	-1	1	oligo	3	1	white	male	39	-1.00785	-0.543311
NIO_UCSF_74388	2	3	1	1	oligo	3	0	white	female	42	3.91446	1.14937
NIO_UCSF_74388	6	0	1	1	oligo	3	0	white	female	42	-1.41866	-1.71783
NIO_UCSF_74388	1	0	1	1	oligo	3	0	white	female	42	-1.00291	-1.22358
NIO_UCSF_74388	5	1	1	1	oligo	3	0	white	female	42	-1.1329	-1.50141
NIO_UCSF_74388	3	0	1	1	oligo	3	0	white	female	42	-0.487789	-0.643319
NIO_UCSF_74388	4	0	1	1	oligo	3	0	white	female	42	-0.575366	-0.730322
NIO_UCSF_75335	3	3	1	0	astro	4	1	white	male	47	3.46235	3.09636
NIO_UCSF_75335	4	3	1	0	astro	4	1	white	male	47	3.48716	3.56227
NIO_UCSF_75335	5	2	1	0	astro	4	1	white	male	47	1.61407	1.24148
NIO_UCSF_75335	1	0	1	0	astro	4	1	white	male	47	-1.48818	-1.59894
NIO_UCSF_75335	2	2	1	0	astro	4	1	white	male	47	3.20872	2.87985
NIO_UCSF_7777	5	3	1	1	oligo	2	0	asian	female	31	2.54867	4.10237
NIO_UCSF_7777	6	3	1	1	oligo	2	0	asian	female	31	2.85081	5.36831
NIO_UCSF_7777	7	2	1	1	oligo	2	0	asian	female	31	-0.961887	0.0384368
NIO_UCSF_7777	1	0	1	1	oligo	2	0	asian	female	31	-1.16359	-1.03419
NIO_UCSF_7777	2	0	1	1	oligo	2	0	asian	female	31	-4.58208	-4.5442
NIO_UCSF_7777	3	0	1	1	oligo	2	0	asian	female	31	-1.57314	-1.67999
NIO_UCSF_7777	4	1	1	1	oligo	2	0	asian	female	31	-1.01718	-1.06882
NIO_UCSF_78641	3	3	0	0	gbm	4	0	asian	male	64	0.961332	2.02224
NIO_UCSF_78641	4	3	0	0	gbm	4	0	asian	male	64	1.08002	1.96353
NIO_UCSF_78641	5	3	0	0	gbm	4	0	asian	male	64	1.52011	2.86578
NIO_UCSF_78641	6	3	0	0	gbm	4	0	asian	male	64	1.39914	2.88271
NIO_UCSF_78641	7	1	0	0	gbm	4	0	asian	male	64	-1.59507	-1.81396
NIO_UCSF_78641	8	0	0	0	gbm	4	0	asian	male	64	-1.08824	-1.4265
NIO_UCSF_78641	1	0	0	0	gbm	4	0	asian	male	64	-0.702572	-0.862858
NIO_UCSF_82582	1	2	-1	0	astro	-1	0	asian	female	61	2.39013	2.89618
NIO_UCSF_82582	2	1	-1	0	astro	-1	0	asian	female	61	-1.33369	-1.61264
NIO_UCSF_82582	3	0	-1	0	astro	-1	0	asian	female	61	-0.299493	-0.482855
NIO_UCSF_82582	4	2	-1	0	astro	-1	0	asian	female	61	-0.248036	-0.488089
NIO_UCSF_82582	5	0	-1	0	astro	-1	0	asian	female	61	-0.887926	-1.13429
NIO_UCSF_82582	6	0	-1	0	astro	-1	0	asian	female	61	-1.49774	-1.7989
NIO_UCSF_83304	1	3	1	1	oligo	3	0	white	male	51	2.51586	2.85759
NIO_UCSF_83304	2	0	1	1	oligo	3	0	white	male	51	-1.74699	-2.70733
NIO_UCSF_83304	3	2	1	1	oligo	3	0	white	male	51	0.990112	0.875074
NIO_UCSF_83304	4	3	1	1	oligo	3	0	white	male	51	3.92844	3.08361
NIO_UCSF_83304	5	3	1	1	oligo	3	0	white	male	51	1.74424	0.641917
NIO_UCSF_84278	1	3	0	0	gbm	4	0	white	female	59	3.46265	4.2577
NIO_UCSF_84278	2	0	0	0	gbm	4	0	white	female	59	-0.719968	-1.01282
NIO_UCSF_84278	3	1	0	0	gbm	4	0	white	female	59	-1.09411	-1.43626
NIO_UCSF_8662	1	1	0	0	gbm	4	0	other	female	56	-1.10145	-1.8068
NIO_UCSF_8662	3	0	0	0	gbm	4	0	other	female	56	1.15589	2.17245
NIO_UCSF_8662	2	1	0	0	gbm	4	0	other	female	56	-1.74786	-2.33161
NIO_UCSF_8662	4	3	0	0	gbm	4	0	other	female	56	3.82656	4.48684
NIO_UCSF_8662	5	3	0	0	gbm	4	0	other	female	56	4.04607	4.86
NIO_UCSF_8662	6	2	0	0	gbm	4	0	other	female	56	-1.78973	-1.99282
NIO_UCSF_8662	7	2	0	0	gbm	4	0	other	female	56	-2.92823	-3.74783
NIO_UCSF_8662	8	2	0	0	gbm	4	0	other	female	56	-0.0491103	0.317329
NIO_UCSF_8662	9	2	0	0	gbm	4	0	other	female	56	-0.627373	-0.388794
NIO_UCSF_8662	10	1	0	0	gbm	4	0	other	female	56	-0.219099	-0.121878
NIO_UCSF_86745	3	1	0	0	gbm	4	1	white	female	80	-0.0993957	-1.43918
NIO_UCSF_86745	4	1	0	0	gbm	4	1	white	female	80	-0.450024	-1.56976
NIO_UCSF_86745	1	2	0	0	gbm	4	1	white	female	80	-0.862107	-1.34892
NIO_UCSF_86745	2	2	0	0	gbm	4	1	white	female	80	-0.885061	-2.26062
NIO_UCSF_86745	5	3	0	0	gbm	4	1	white	female	80	-0.00297578	1.6322
NIO_UCSF_88550	1	3	1	0	astro	3	0	white	female	36	3.61847	3.76195
NIO_UCSF_88550	2	0	1	0	astro	3	0	white	female	36	-1.36435	-1.7335
NIO_UCSF_88550	3	0	1	0	astro	3	0	white	female	36	-1.68126	-1.1515
NIO_UCSF_88550	4	0	1	0	astro	3	0	white	female	36	-1.23481	-1.55545
NIO_UCSF_88550	5	0	1	0	astro	3	0	white	female	36	-2.54273	-2.67465
NIO_UCSF_88550	6	0	1	0	astro	3	0	white	female	36	-1.18682	-2.16171
NIO_UCSF_88550	7	0	1	0	astro	3	0	white	female	36	-0.933344	-1.38851
NIO_UCSF_88550	8	2	1	0	astro	3	0	white	female	36	-0.799455	-1.19926
NIO_UCSF_88550	9	0	1	0	astro	3	0	white	female	36	-1.3472	-2.22047
NIO_UCSF_89882	1	0	0	0	gbm	4	0	white	male	66	-1.22406	-1.54945
NIO_UCSF_89882	2	3	0	0	gbm	4	0	white	male	66	3.20579	1.80971
NIO_UCSF_89882	3	3	0	0	gbm	4	0	white	male	66	4.10649	1.73675
NIO_UCSF_89882	4	2	0	0	gbm	4	0	white	male	66	2.29483	3.75715
NIO_UCSF_89882	5	2	0	0	gbm	4	0	white	male	66	3.28597	1.93403
NIO_UCSF_89882	6	3	0	0	gbm	4	0	white	male	66	3.83007	4.84486
NIO_UCSF_89882	7	2	0	0	gbm	4	0	white	male	66	2.91432	2.6239
NIO_UCSF_90350	1	3	0	0	gbm	4	0	white	male	66	3.00629	3.15409
NIO_UCSF_90350	2	0	0	0	gbm	4	0	white	male	66	-1.25234	-1.51384
NIO_UCSF_90350	3	2	0	0	gbm	4	0	white	male	66	-0.377565	-0.803638
NIO_UCSF_90350	4	1	0	0	gbm	4	0	white	male	66	-2.50917	-1.64639
NIO_UCSF_91565	2	3	0	0	gbm	4	0	white	male	74	3.42005	2.27496
NIO_UCSF_91565	3	3	0	0	gbm	4	0	white	male	74	2.61564	1.74555
NIO_UCSF_91565	6	3	0	0	gbm	4	0	white	male	74	2.94177	2.4263
NIO_UCSF_91565	7	3	0	0	gbm	4	0	white	male	74	3.30915	2.11094
NIO_UCSF_91565	8	3	0	0	gbm	4	0	white	male	74	2.20965	1.49146
NIO_UCSF_91565	9	3	0	0	gbm	4	0	white	male	74	3.81898	2.34094
NIO_UCSF_91565	10	3	0	0	gbm	4	0	white	male	74	3.24547	2.1825
NIO_UCSF_91565	11	3	0	0	gbm	4	0	white	male	74	4.25467	3.79367
NIO_UCSF_91565	1	2	0	0	gbm	4	0	white	male	74	-0.912881	-1.54029
NIO_UCSF_91565	4	3	0	0	gbm	4	0	white	male	74	3.18472	2.41407
NIO_UCSF_91565	5	3	0	0	gbm	4	0	white	male	74	3.87238	2.85018
NIO_UCSF_91565	12	2	0	0	gbm	4	0	white	male	74	0.210701	-0.149637
NIO_UCSF_92103	1	2	1	0	astro	3	1	white	male	34	0.438332	-0.0443249
NIO_UCSF_92103	2	2	1	0	astro	3	1	white	male	34	0.838642	0.461359
NIO_UCSF_92103	3	1	1	0	astro	3	1	white	male	34	0.0620197	0.483646
NIO_UCSF_92103	4	1	1	0	astro	3	1	white	male	34	0.00328149	-0.212613
NIO_UCSF_92103	5	3	1	0	astro	3	1	white	male	34	4.32356	4.8748
NIO_UCSF_92103	6	3	1	0	astro	3	1	white	male	34	4.56336	5.0628
NIO_UCSF_92103	8	0	1	0	astro	3	1	white	male	34	-0.592357	-0.328435
NIO_UCSF_92103	9	0	1	0	astro	3	1	white	male	34	-0.682894	-0.513687
NIO_UCSF_92103	10	3	1	0	astro	3	1	white	male	34	1.78564	0.763311
NIO_UCSF_92103	11	3	1	0	astro	3	1	white	male	34	2.61325	1.29691
NIO_UCSF_93293	1	3	0	0	gbm	4	1	white	male	45	1.6	-1.19906
NIO_UCSF_93293	2	3	0	0	gbm	4	1	white	male	45	1.60562	0.385129
NIO_UCSF_93293	3	3	0	0	gbm	4	1	white	male	45	1.60211	-0.502014
NIO_UCSF_941	2	3	0	0	gbm	4	0	asian	male	61	3.38053	2.93511
NIO_UCSF_941	1	3	0	0	gbm	4	0	asian	male	61	3.7879	3.55441
NIO_UCSF_95148	2	0	1	1	oligo	3	0	white	male	79	-0.716386	-0.963461
NIO_UCSF_95148	3	2	1	1	oligo	3	0	white	male	79	0.285439	0.00303102
NIO_UCSF_95148	1	3	1	1	oligo	3	0	white	male	79	3.04689	0.908293
NIO_UCSF_95148	4	0	1	1	oligo	3	0	white	male	79	-0.783062	-1.25719
NIO_UCSF_95148	5	3	1	1	oligo	3	0	white	male	79	2.24025	1.56724
NIO_UCSF_95148	6	2	1	1	oligo	3	0	white	male	79	0.427729	0.383867
NIO_UCSF_9807	1	0	0	-1	circ	2	0	asian/ native american or alaska native	male	30	-0.743351	-0.854449
NIO_UCSF_9807	2	0	0	-1	circ	2	0	asian/ native american or alaska native	male	30	-0.577377	-0.49301
NIO_UCSF_9807	3	2	0	-1	circ	2	0	asian/ native american or alaska native	male	30	3.64292	1.87392
NIO_UCSF_9807	4	2	0	-1	circ	2	0	asian/ native american or alaska native	male	30	3.63837	2.01368
NIO_UCSF_99540	1	0	1	1	oligo	2	1	other	female	42	-1.15476	-1.83905
NIO_UCSF_99540	2	2	1	1	oligo	2	1	other	female	42	-1.58164	-1.99154
NIO_UCSF_99540	3	2	1	1	oligo	2	1	other	female	42	-1.60056	-1.98769
NIO_UCSF_99540	4	2	1	1	oligo	2	1	other	female	42	0.432548	-0.433986
NIO_UCSF_99540	5	2	1	1	oligo	2	1	other	female	42	2.17671	0.998556
NIO_UCSF_99540	6	2	1	1	oligo	2	1	other	female	42	-0.21339	-2.45121
NIO_UCSF_99540	7	0	1	1	oligo	2	1	other	female	42	-1.3244	-2.08366
NIO_UCSF_99540	8	2	1	1	oligo	2	1	other	female	42	-1.47333	-1.85787
NIO_UCSF_99540	9	1	1	1	oligo	2	1	other	female	42	-1.50762	-2.01599
