# Supplementary material for: Visual foundation models for fast, label-free detection of diffuse glioma infiltration
Source: Research Square preprint supplement (doi:10.21203/rs.3.rs-4033133/v1), 2024-03-12
Supplement: Supplementary file 2 [file 517366d1e149070749a3853c.xlsx]

## Sheet: Sheet 1
Table 1
slide	specimen_barcode	slide_tumor_infiltration_label	specimen_he_label	specimen_ihc_label	5ala_status	flair_status	ce_status	molecular_diagnosis	fastglioma_logit
NIO_UCSF_103473/3	AF00047	3	3	3	-1	1	1	astro	2.27505
NIO_UCSF_103473/4	AF00047	3	3	3	-1	1	1	astro	1.82617
NIO_UCSF_103473/5	AF00047	3	3	3	-1	1	1	astro	3.9264
NIO_UCSF_103473/1	AF00152	0	1	0	-1	0	0	astro	-1.85303
NIO_UCSF_103473/2	AF00152	0	1	0	-1	0	0	astro	-1.72397
NIO_UCSF_103473/6	AF00143	3	3	3	-1	1	1	astro	2.65956
NIO_UCSF_103473/7	AF00143	3	3	3	-1	1	1	astro	3.20598
NIO_UCSF_103473/8	AF00836	3	3	3	-1	1	1	astro	1.57403
NIO_UCSF_105297/1	AF01009	2	2	-1	-1	1	1	gbm	-0.362037
NIO_UCSF_105297/2	AF01009	3	2	-1	-1	1	1	gbm	-0.800784
NIO_UCSF_105297/11	AF01009	3	2	-1	-1	1	1	gbm	0.51344
NIO_UCSF_105297/12	AF01009	3	2	-1	-1	1	1	gbm	0.96985
NIO_UCSF_105297/9	AF01047	3	3	-1	-1	1	1	gbm	3.11248
NIO_UCSF_105297/10	AF01047	3	3	-1	-1	1	1	gbm	3.27467
NIO_UCSF_105297/3	AF01033	0	1	-1	-1	0	0	gbm	-1.03453
NIO_UCSF_105297/4	AF01033	1	1	-1	-1	0	0	gbm	-1.61378
NIO_UCSF_105297/5	AF01011	2	2	-1	-1	1	0	gbm	0.241849
NIO_UCSF_105297/6	AF00698	1	2	-1	-1	0	0	gbm	-1.3586
NIO_UCSF_105297/7	AF00715	0	1	-1	-1	0	0	gbm	-0.852513
NIO_UCSF_105297/8	AF00728	1	2	-1	-1	0	0	gbm	-1.28713
NIO_UCSF_106365/1	AF01049	3	3	3	-1	1	1	gbm	1.57097
NIO_UCSF_106365/2	AF01049	3	3	3	-1	1	1	gbm	0.443968
NIO_UCSF_106365/3	AF01049	3	3	3	-1	1	1	gbm	1.39246
NIO_UCSF_106365/4	AF01049	3	3	3	-1	1	1	gbm	-0.0276803
NIO_UCSF_107737/1	AF01052	0	0	-1	-1	0	0	other	-1.50713
NIO_UCSF_107737/2	AF01052	0	0	-1	-1	0	0	other	-0.993103
NIO_UCSF_107737/3	AF00694	2	2	-1	-1	1	0	other	1.2699
NIO_UCSF_107737/4	AF00696	0	1	-1	-1	0	0	other	-1.38368
NIO_UCSF_108811/1	AF00723	0	0	0	-1	1	0	astro	-1.81722
NIO_UCSF_108811/2	AF00707	3	3	3	-1	1	1	astro	4.25795
NIO_UCSF_108811/3	AF00961	3	3	3	-1	1	0	astro	4.87347
NIO_UCSF_108811/4	AF00865	3	3	3	-1	1	0	astro	5.18089
NIO_UCSF_108811/5	AF00841	2	3	3	-1	1	0	astro	3.23344
NIO_UCSF_109465/7	AF00828	3	3	-1	-1	1	1	gbm	2.60576
NIO_UCSF_109465/8	AF00828	3	3	-1	-1	1	1	gbm	-0.0201663
NIO_UCSF_109465/1	AF00697	0	0	-1	-1	1	0	gbm	-2.42077
NIO_UCSF_109465/2	AF00697	0	0	-1	-1	1	0	gbm	-0.44836
NIO_UCSF_109465/3	AF00695	0	1	-1	-1	1	0	gbm	-1.65878
NIO_UCSF_109465/4	AF00955	2	2	-1	-1	1	0	gbm	-0.987169
NIO_UCSF_109465/5	AF01024	2	2	-1	-1	0	0	gbm	-0.502512
NIO_UCSF_109465/6	AF00878	1	2	-1	-1	0	0	gbm	-2.78046
NIO_UCSF_11330/6	AF00174	2	2	2	1	1	1	astro	1.34484
NIO_UCSF_113587/2	AF01012	2	2	-1	0	1	0	gbm	0.795931
NIO_UCSF_113587/3	AF01051	2	2	-1	0	0	0	gbm	-1.03041
NIO_UCSF_113587/4	AF00690	2	2	-1	0	0	0	gbm	0.947968
NIO_UCSF_113587/5	AF00684	0	1	-1	1	1	0	gbm	0.571502
NIO_UCSF_113587/1	AF00734	3	3	-1	-1	1	1	gbm	1.82429
NIO_UCSF_114346/3	AF00210	2	3	-1	-1	1	1	oligo	0.35578
NIO_UCSF_114346/4	AF00210	3	3	-1	-1	1	1	oligo	3.22044
NIO_UCSF_114346/5	AF00210	3	3	-1	-1	1	1	oligo	3.90513
NIO_UCSF_114346/1	AF00221	0	0	-1	-1	1	1	oligo	-1.20245
NIO_UCSF_114346/2	AF00221	0	0	-1	-1	1	1	oligo	-2.09996
NIO_UCSF_114346/7	AF00875	2	2	-1	-1	0	0	oligo	-1.40634
NIO_UCSF_115417/3	AF00202	3	3	-1	-1	0	1	gbm	3.56308
NIO_UCSF_115417/4	AF00202	3	3	-1	-1	0	1	gbm	3.14548
NIO_UCSF_115417/5	AF01042	3	3	-1	-1	0	1	gbm	2.1146
NIO_UCSF_115417/6	AF01042	3	3	-1	-1	0	1	gbm	1.04795
NIO_UCSF_115417/1	AF00226	1	2	-1	-1	0	0	gbm	-1.1047
NIO_UCSF_115417/2	AF00226	2	2	-1	-1	0	0	gbm	-0.916839
NIO_UCSF_115417/7	AF01008	2	2	-1	1	0	0	gbm	0.820376
NIO_UCSF_115417/8	AF00693	1	1	-1	-1	1	1	gbm	-1.37113
NIO_UCSF_115417/9	AF00693	0	1	-1	-1	1	1	gbm	-1.54423
NIO_UCSF_116351/1	AF00233	0	2	-1	-1	1	1	oligo	-2.09953
NIO_UCSF_116351/2	AF00233	2	2	-1	-1	1	1	oligo	0.930285
NIO_UCSF_116351/3	AF01046	3	3	-1	-1	1	1	oligo	2.69177
NIO_UCSF_116351/4	AF01028	3	3	-1	-1	1	1	oligo	3.55354
NIO_UCSF_116351/5	AF00691	3	3	-1	-1	1	1	oligo	3.72007
NIO_UCSF_116351/7	AF00691	3	3	-1	-1	1	1	oligo	2.98342
NIO_UCSF_116351/6	AF01040	2	2	-1	-1	1	0	oligo	0.142767
NIO_UCSF_117375/1	AF00998	3	3	-1	-1	1	1	gbm	4.90751
NIO_UCSF_117375/2	AF00998	3	3	-1	-1	1	1	gbm	3.83707
NIO_UCSF_117375/3	AH00937	3	3	-1	-1	1	0	gbm	7.2149
NIO_UCSF_117375/4	AH00937	3	3	-1	-1	1	0	gbm	7.49683
NIO_UCSF_117375/5	AH00951	2	2	-1	-1	1	0	gbm	0.507682
NIO_UCSF_117375/6	AH00987	2	2	-1	-1	1	0	gbm	0.685854
NIO_UCSF_117375/7	AH00952	2	2	-1	-1	0	0	gbm	1.35889
NIO_UCSF_117375/8	AH00980	2	2	-1	-1	1	0	gbm	0.593718
NIO_UCSF_117375/9	AH01006	2	2	-1	-1	0	0	gbm	2.54747
NIO_UCSF_117375/10	AH01006	2	2	-1	-1	0	0	gbm	0.696817
NIO_UCSF_118425/4	AH00981	3	3	3	-1	1	1	gbm	1.11393
NIO_UCSF_118425/5	AH00985	1	0	0	-1	0	0	gbm	-0.784203
NIO_UCSF_118425/6	AH00985	1	0	0	-1	0	0	gbm	-0.734761
NIO_UCSF_119323/1	AH00997	3	3	3	-1	1	1	gbm	5.314
NIO_UCSF_120839/1	AH00990	3	3	-1	-1	1	1	gbm	4.74049
NIO_UCSF_120839/2	AH00990	3	3	-1	-1	1	1	gbm	4.51996
NIO_UCSF_120839/3	AH00977	2	2	-1	-1	0	0	gbm	0.274322
NIO_UCSF_120839/4	AH00973	2	2	-1	-1	0	0	gbm	0.588466
NIO_UCSF_120839/5	AH00975	2	2	-1	-1	1	1	gbm	0.629287
NIO_UCSF_120839/6	AH00978	2	2	-1	-1	1	1	gbm	-0.128973
NIO_UCSF_120839/7	AH01009	2	2	-1	-1	0	0	gbm	-0.21189
NIO_UCSF_121503/1	AH01018	2	3	3	-1	1	1	oligo	0.22903
NIO_UCSF_121503/2	AH01018	2	3	3	-1	1	1	oligo	0.0643287
NIO_UCSF_121503/3	AH01018	3	3	3	-1	1	1	oligo	2.52498
NIO_UCSF_121503/4	AH01015	1	2	2	-1	1	1	oligo	-1.53541
NIO_UCSF_121503/5	AH01015	0	2	2	-1	1	1	oligo	-2.25115
NIO_UCSF_121503/6	AH01012	3	3	3	-1	1	1	oligo	1.54214
NIO_UCSF_121503/7	AH01012	3	3	3	-1	1	1	oligo	2.59998
NIO_UCSF_121503/8	AH01008	0	1	0	-1	1	0	oligo	-0.825656
NIO_UCSF_121503/9	AH01008	0	1	0	-1	1	0	oligo	-0.843572
NIO_UCSF_121503/10	AH01021	0	2	0	-1	0	0	oligo	-1.94403
NIO_UCSF_121503/11	AH01020	0	0	0	-1	0	0	oligo	-2.08819
NIO_UCSF_121503/12	AH01005	0	1	0	-1	0	0	oligo	-0.407933
NIO_UCSF_121503/14	AH01005	0	1	0	-1	0	0	oligo	-3.20702
NIO_UCSF_121503/13	AH00988	0	0	0	-1	0	0	oligo	-1.83821
NIO_UCSF_121503/15	AH01022	0	0	0	-1	0	0	oligo	-0.375003
NIO_UCSF_121503/16	AH01022	0	0	0	-1	0	0	oligo	-0.755346
NIO_UCSF_122794/12	AH00940	2	2	2	-1	0	0	astro	-0.653403
NIO_UCSF_122794/3	AH00976	3	3	3	-1	1	0	astro	2.74988
NIO_UCSF_122794/4	AH00976	3	3	3	-1	1	0	astro	2.81161
NIO_UCSF_122794/5	AH00976	3	3	3	-1	1	0	astro	3.42038
NIO_UCSF_122794/6	AH00986	3	3	3	-1	1	0	astro	2.88194
NIO_UCSF_122794/11	AH00974	0	1	2	-1	0	0	astro	-0.909372
NIO_UCSF_122794/10	AH01023	0	1	1	-1	0	0	astro	-0.822575
NIO_UCSF_122794/1	AH01013	0	2	2	-1	0	0	astro	-0.782194
NIO_UCSF_122794/2	AH01013	2	2	2	-1	0	0	astro	-1.10815
NIO_UCSF_122794/9	AF01027	2	2	2	-1	0	0	astro	-0.15263
NIO_UCSF_122794/7	AH01004	1	2	2	-1	0	0	astro	-0.55473
NIO_UCSF_122794/8	AF01025	2	2	2	-1	0	0	astro	-0.405773
NIO_UCSF_1231014/1	AH01001	0	0	1	-1	0	0	astro	-1.1332
NIO_UCSF_1231014/2	AH00998	1	0	0	-1	0	0	astro	-0.600821
NIO_UCSF_1231014/3	AH01007	0	0	0	-1	0	0	astro	-0.703914
NIO_UCSF_1231014/4	AH00994	2	2	2	-1	0	0	astro	-0.590404
NIO_UCSF_124344/1	AH01002	3	3	-1	-1	1	1	gbm	3.09694
NIO_UCSF_124344/2	AH01000	2	2	-1	-1	1	0	gbm	1.1398
NIO_UCSF_124344/3	AH01017	2	2	-1	-1	0	0	gbm	0.856067
NIO_UCSF_124344/4	AH01003	2	2	-1	-1	0	0	gbm	-0.177498
NIO_UCSF_124344/5	AH01011	2	2	-1	-1	0	0	gbm	0.22642
NIO_UCSF_124344/6	AH01010	2	2	-1	-1	1	0	gbm	1.88128
NIO_UCSF_125932/4	AH00950	3	3	3	-1	1	0	oligo	4.9182
NIO_UCSF_125932/5	AH00950	3	3	3	-1	1	0	oligo	5.13647
NIO_UCSF_125932/6	AH00950	3	3	3	-1	1	0	oligo	4.86254
NIO_UCSF_125932/8	AF00234	2	2	2	-1	0	0	oligo	0.832808
NIO_UCSF_125932/9	AF00754	2	2	2	-1	0	0	oligo	-0.69402
NIO_UCSF_125932/1	AH00947	3	3	3	-1	1	0	oligo	1.69567
NIO_UCSF_125932/2	AH00947	3	3	3	-1	1	0	oligo	3.77437
NIO_UCSF_125932/3	AH00948	2	2	2	-1	1	0	oligo	-0.817686
NIO_UCSF_125932/7	AF00214	0	1	0	-1	0	0	oligo	-0.929511
NIO_UCSF_12629/9	AH00933	2	2	2	-1	0	0	oligo	2.39928
NIO_UCSF_12629/11	AH00933	2	2	2	-1	0	0	oligo	1.30202
NIO_UCSF_12629/8	AH00964	1	2	2	-1	1	0	oligo	-0.448092
NIO_UCSF_12629/10	AH00993	3	2	2	-1	1	0	oligo	2.13373
NIO_UCSF_12629/1	AF01050	3	3	3	1	1	1	oligo	4.13832
NIO_UCSF_12629/2	AF01050	3	3	3	1	1	1	oligo	4.66303
NIO_UCSF_12629/3	AH00934	2	2	2	-1	0	0	oligo	1.70262
NIO_UCSF_12629/4	AH00934	3	2	2	-1	0	0	oligo	2.04474
NIO_UCSF_12629/5	AH00932	2	3	3	-1	1	0	oligo	2.43649
NIO_UCSF_12629/6	AH00932	3	3	3	-1	1	0	oligo	3.4213
NIO_UCSF_12629/7	AH00932	3	3	3	-1	1	0	oligo	2.69199
NIO_UCSF_127633/1	AH00684	2	2	-1	-1	1	0	gbm	0.732547
NIO_UCSF_127633/2	AH00684	2	2	-1	-1	1	0	gbm	-0.265282
NIO_UCSF_127633/6	AH00670	2	2	-1	-1	1	0	gbm	0.932135
NIO_UCSF_127633/3	AH00657	2	2	-1	-1	1	0	gbm	0.979607
NIO_UCSF_127633/4	AH00665	0	1	-1	-1	0	0	gbm	-0.853217
NIO_UCSF_127633/5	AH00675	2	2	-1	-1	1	0	gbm	1.24121
NIO_UCSF_127633/7	AH00616	0	0	-1	-1	1	0	gbm	-0.604914
NIO_UCSF_127633/8	AH00603	2	2	-1	-1	0	0	gbm	-0.127546
NIO_UCSF_127633/9	AH00673	2	2	-1	-1	1	0	gbm	0.116707
NIO_UCSF_127633/10	AH00674	2	2	-1	-1	1	0	gbm	0.141879
NIO_UCSF_128232/1	AH00614	3	3	-1	-1	1	1	gbm	2.92049
NIO_UCSF_128232/2	AH00614	3	3	-1	-1	1	1	gbm	2.90893
NIO_UCSF_128232/3	AH00618	3	2	-1	-1	0	0	gbm	4.02944
NIO_UCSF_128232/4	AH00604	0	1	-1	-1	0	0	gbm	-0.628298
NIO_UCSF_128232/5	AH00602	1	1	-1	-1	0	0	gbm	-0.840689
NIO_UCSF_128232/6	AH00686	2	2	-1	-1	0	0	gbm	0.247646
NIO_UCSF_129158/1	AH00681	3	3	-1	-1	1	1	gbm	4.00877
NIO_UCSF_129158/2	AH00681	3	3	-1	-1	1	1	gbm	3.10753
NIO_UCSF_129158/3	AH00653	1	1	-1	-1	0	0	gbm	-0.594976
NIO_UCSF_129158/4	AH00654	2	2	-1	-1	0	0	gbm	0.662246
NIO_UCSF_129158/5	AH00663	2	2	-1	-1	1	0	gbm	0.714304
NIO_UCSF_129158/6	AH00666	1	2	-1	-1	0	0	gbm	-0.815879
NIO_UCSF_130858/1	AH00555	3	3	3	-1	1	1	gbm	4.35924
NIO_UCSF_130858/2	AH00555	3	3	3	-1	1	1	gbm	5.19304
NIO_UCSF_130858/3	AH00668	1	1	1	-1	0	0	gbm	-0.993824
NIO_UCSF_130858/4	AH00565	0	0	0	-1	0	0	gbm	-1.27224
NIO_UCSF_130858/5	AH00671	1	0	0	-1	0	0	gbm	-0.608487
NIO_UCSF_130858/6	AH00669	2	2	2	-1	0	0	gbm	-0.430509
NIO_UCSF_130858/7	AH00682	2	2	2	-1	0	0	gbm	-0.196911
NIO_UCSF_130858/8	AH00679	2	2	2	-1	1	0	gbm	-0.204082
NIO_UCSF_131442/1	AH00677	0	0	-1	-1	0	0	other	-1.83077
NIO_UCSF_131442/2	AH00677	0	0	-1	-1	0	0	other	-1.23795
NIO_UCSF_131442/3	AH00680	2	2	-1	-1	-1	-1	other	-1.45461
NIO_UCSF_131442/4	AH00680	2	2	-1	-1	-1	-1	other	-0.807081
NIO_UCSF_132140/5	AH00650	3	3	3	1	1	0	astro	4.97011
NIO_UCSF_132140/6	AH00685	2	2	2	-1	1	0	astro	0.932375
NIO_UCSF_132140/1	AH00676	1	0	0	-1	1	0	astro	-1.31497
NIO_UCSF_132140/2	AH00676	0	0	0	-1	1	0	astro	-0.789903
NIO_UCSF_132140/3	AH00554	3	3	-1	-1	1	1	astro	5.04968
NIO_UCSF_132140/4	AH00578	3	3	3	-1	1	1	astro	6.96953
NIO_UCSF_132140/7	AH00664	3	3	3	-1	1	0	astro	1.00699
NIO_UCSF_132140/8	AH00672	3	3	3	-1	1	0	astro	1.90279
NIO_UCSF_132140/9	AH00658	2	2	3	-1	1	0	astro	0.960443
NIO_UCSF_132140/10	AH00656	3	3	3	-1	1	0	astro	5.62789
NIO_UCSF_133469/2	AH00647	2	2	2	-1	1	0	astro	0.788791
NIO_UCSF_133469/3	AH00647	3	2	2	-1	1	0	astro	2.2839
NIO_UCSF_133469/4	AH00647	2	2	2	-1	1	0	astro	2.52291
NIO_UCSF_133469/7	AH00662	2	2	2	-1	-1	-1	astro	2.30583
NIO_UCSF_133469/1	AH00667	1	0	0	-1	0	0	astro	-1.00088
NIO_UCSF_133469/5	AH00649	2	1	0	-1	0	0	astro	-0.797766
NIO_UCSF_133469/6	AH00655	2	2	2	-1	1	0	astro	1.7443
NIO_UCSF_133469/8	AH00648	2	2	2	-1	0	0	astro	1.13706
NIO_UCSF_133469/9	AH00661	2	2	2	-1	-1	-1	astro	1.8734
NIO_UCSF_13394/1	AF00725	3	3	3	-1	1	0	gbm	2.94064
NIO_UCSF_13394/2	AF00706	3	3	3	-1	0	0	gbm	2.89363
NIO_UCSF_13394/5	AF00747	3	3	3	-1	1	0	gbm	5.17654
NIO_UCSF_135406/1	AH00639	3	2	2	-1	1	0	astro	2.24573
NIO_UCSF_135406/2	AH00640	1	2	2	-1	1	1	astro	-1.28921
NIO_UCSF_135406/3	AH00659	3	3	3	1	1	0	astro	4.90397
NIO_UCSF_135406/4	AH00651	2	2	2	-1	1	0	astro	0.622081
NIO_UCSF_135406/5	AH00651	2	2	2	-1	1	0	astro	1.09551
NIO_UCSF_138214/2	AH00557	3	3	-1	-1	-1	0	other	2.55978
NIO_UCSF_138214/3	AH00557	3	3	-1	-1	-1	0	other	2.28721
NIO_UCSF_138214/4	AH00566	3	3	-1	-1	-1	1	other	1.54599
NIO_UCSF_139670/1	AH00606	3	3	3	-1	1	1	gbm	3.67573
NIO_UCSF_139670/2	AH00606	3	3	3	-1	1	1	gbm	4.42372
NIO_UCSF_139670/3	AH00596	3	3	3	-1	1	1	gbm	2.83514
NIO_UCSF_139670/4	AH00596	3	3	3	-1	1	1	gbm	1.92728
NIO_UCSF_139670/5	AH00607	2	2	2	-1	1	0	gbm	-0.898905
NIO_UCSF_139670/6	AH00594	0	0	0	-1	1	0	gbm	-0.493568
NIO_UCSF_139670/7	AH00594	0	0	0	-1	1	0	gbm	-1.51733
NIO_UCSF_139670/8	AH00594	0	0	0	-1	1	0	gbm	-1.49145
NIO_UCSF_14147/1	AH00600	3	3	3	-1	1	0	oligo	5.63549
NIO_UCSF_14147/2	AH00600	3	3	3	-1	1	0	oligo	3.9137
NIO_UCSF_14147/3	AH00600	3	3	3	-1	1	0	oligo	5.44063
NIO_UCSF_14147/4	AH00608	2	2	2	-1	0	0	oligo	0.536248
NIO_UCSF_14147/5	AH00608	2	2	2	-1	0	0	oligo	3.02539
NIO_UCSF_14147/6	AH00605	2	2	2	-1	0	0	oligo	-1.30894
NIO_UCSF_14147/7	AH00610	0	2	2	-1	0	0	oligo	0.600659
NIO_UCSF_14147/8	AH00564	0	1	2	-1	0	0	oligo	-2.18345
NIO_UCSF_142173/1	AH00642	3	3	-1	-1	1	1	gbm	2.46257
NIO_UCSF_142173/2	AH00642	3	3	-1	-1	1	1	gbm	4.44358
NIO_UCSF_142173/3	AH00644	0	0	-1	-1	0	0	gbm	-0.80663
NIO_UCSF_142173/4	AH00644	0	0	-1	-1	0	0	gbm	-1.55044
NIO_UCSF_142173/5	AH00569	2	2	-1	-1	0	0	gbm	0.127678
NIO_UCSF_143357/1	AH00556	3	3	-1	1	1	1	gbm	1.22422
NIO_UCSF_143357/2	AH00572	3	3	-1	-1	1	1	gbm	1.57817
NIO_UCSF_143357/3	AH00572	3	3	-1	-1	1	1	gbm	2.0921
NIO_UCSF_143357/4	AH00573	3	3	-1	-1	1	1	gbm	4.1491
NIO_UCSF_143357/5	AH00573	3	3	-1	-1	1	1	gbm	3.74732
NIO_UCSF_143357/6	AH00571	1	2	-1	-1	1	1	gbm	-0.0528808
NIO_UCSF_145225/1	AH00574	0	2	2	-1	0	0	astro	-0.880978
NIO_UCSF_145225/2	AH00574	1	2	2	-1	0	0	astro	-0.584517
NIO_UCSF_145225/3	AH00570	3	3	3	-1	1	0	astro	2.76446
NIO_UCSF_145225/4	AH00660	3	3	3	-1	1	0	astro	1.3465
NIO_UCSF_145225/5	AH00660	3	3	3	-1	1	0	astro	2.07829
NIO_UCSF_145225/6	AH00683	2	3	3	-1	0	0	astro	1.69543
NIO_UCSF_145225/7	AH00678	1	2	2	-1	0	0	astro	1.12211
NIO_UCSF_145225/8	AH00577	3	3	3	-1	1	0	astro	2.6355
NIO_UCSF_145225/9	AH00628	3	3	3	-1	0	0	astro	3.22128
NIO_UCSF_14635/2	AF00749	3	3	3	-1	1	1	astro	4.24992
NIO_UCSF_14635/4	AF00749	3	3	3	-1	1	1	astro	4.52809
NIO_UCSF_14635/5	AF01463	2	2	2	-1	0	0	astro	1.08136
NIO_UCSF_14635/8	AF01463	2	2	2	-1	0	0	astro	0.689697
NIO_UCSF_14635/6	AF01461	0	2	2	-1	0	0	astro	1.57374
NIO_UCSF_14635/7	AF01461	2	2	2	-1	0	0	astro	1.46712
NIO_UCSF_14635/9	AF00731	2	2	2	-1	0	0	astro	-1.11849
NIO_UCSF_14635/10	AF00731	2	2	2	-1	0	0	astro	-1.31689
NIO_UCSF_14635/11	AF01459	1	2	2	-1	0	0	astro	1.07127
NIO_UCSF_14635/12	AF00375	2	2	2	-1	0	0	astro	1.81665
NIO_UCSF_14635/13	AF00375	2	2	2	-1	0	0	astro	2.58229
NIO_UCSF_14635/1	AF00605	0	0	0	-1	0	0	astro	0.0416291
NIO_UCSF_14635/3	AF00605	0	0	0	-1	0	0	astro	-0.00327265
NIO_UCSF_146634/1	AH00568	3	3	3	-1	1	0	oligo	3.37372
NIO_UCSF_146634/2	AH00568	3	3	3	-1	1	0	oligo	3.56128
NIO_UCSF_146634/3	AH00568	3	3	3	-1	1	0	oligo	3.29644
NIO_UCSF_146634/4	AH00612	2	2	2	-1	1	0	oligo	-0.347392
NIO_UCSF_146634/5	AH00612	1	2	2	-1	1	0	oligo	-1.17116
NIO_UCSF_146634/6	AH00741	2	2	2	-1	1	0	oligo	0.520682
NIO_UCSF_146634/7	AH00741	2	2	2	-1	1	0	oligo	1.84075
NIO_UCSF_146634/8	AH00576	2	2	2	-1	1	0	oligo	0.873187
NIO_UCSF_146634/9	AH00562	2	2	2	-1	0	0	oligo	0.555175
NIO_UCSF_147101/1	AH00432	2	3	-1	-1	1	1	gbm	4.07444
NIO_UCSF_147101/2	AH00432	3	3	-1	-1	1	1	gbm	4.05145
NIO_UCSF_147101/3	AH00560	2	2	-1	-1	1	1	gbm	1.22997
NIO_UCSF_147101/4	AH00446	0	0	-1	-1	0	0	gbm	-1.12052
NIO_UCSF_147101/5	AH00592	1	0	-1	-1	1	0	gbm	0.127929
NIO_UCSF_147101/6	AH00450	0	0	-1	-1	0	0	gbm	-1.60922
NIO_UCSF_147101/7	AH00450	0	0	-1	-1	0	0	gbm	-1.20536
NIO_UCSF_147101/8	AH00418	2	2	-1	-1	0	0	gbm	1.45804
NIO_UCSF_147101/9	AH00418	2	2	-1	-1	0	0	gbm	1.59272
NIO_UCSF_14859/1	AH00445	3	3	3	-1	-1	-1	gbm	4.51493
NIO_UCSF_14859/2	AH00445	3	3	3	-1	-1	-1	gbm	3.70067
NIO_UCSF_14859/3	AH00428	3	3	3	-1	-1	-1	gbm	3.61872
NIO_UCSF_14859/4	AH00428	3	3	3	-1	-1	-1	gbm	4.40834
NIO_UCSF_149609/1	AH00429	3	3	-1	-1	1	1	gbm	3.32472
NIO_UCSF_149609/2	AH00429	3	3	-1	-1	1	1	gbm	3.68653
NIO_UCSF_149609/3	AH00430	2	2	-1	-1	1	0	gbm	3.16936
NIO_UCSF_149609/4	AH00430	2	2	-1	-1	1	0	gbm	2.94991
NIO_UCSF_149609/5	AH00441	3	3	-1	-1	1	1	gbm	2.38254
NIO_UCSF_149609/6	AH00441	3	3	-1	-1	1	1	gbm	2.36656
NIO_UCSF_149609/7	AH00447	3	3	-1	-1	0	0	gbm	4.61665
NIO_UCSF_149609/8	AH00449	2	2	-1	-1	1	1	gbm	0.904655
NIO_UCSF_149609/9	AH00449	2	2	-1	-1	1	1	gbm	4.35464
NIO_UCSF_149609/10	AH00448	2	2	-1	-1	0	0	gbm	3.00246
NIO_UCSF_149609/11	AH00443	2	2	-1	-1	1	0	gbm	4.99725
NIO_UCSF_150670/1	AH00442	2	2	-1	-1	1	0	oligo	3.33594
NIO_UCSF_150670/2	AH00442	2	2	-1	-1	1	0	oligo	3.10975
NIO_UCSF_150670/3	AH00558	2	2	-1	-1	0	0	oligo	0.210359
NIO_UCSF_150670/4	AH00558	2	2	-1	-1	0	0	oligo	0.835955
NIO_UCSF_150670/5	AH00559	0	0	-1	-1	0	0	oligo	-1.25213
NIO_UCSF_150670/6	AH00609	3	3	-1	-1	1	0	oligo	4.10579
NIO_UCSF_150670/7	AH00609	3	3	-1	-1	1	0	oligo	3.20511
NIO_UCSF_151922/1	AH00567	2	2	-1	-1	1	1	gbm	-0.019144
NIO_UCSF_151922/2	AH00567	2	2	-1	-1	1	1	gbm	0.698103
NIO_UCSF_151922/3	AH00567	2	2	-1	-1	1	1	gbm	1.36216
NIO_UCSF_151922/4	AH00561	2	2	-1	-1	1	0	gbm	2.43901
NIO_UCSF_151922/5	AH00636	0	0	-1	-1	1	0	gbm	-1.31361
NIO_UCSF_151922/6	AH00636	2	2	-1	-1	1	0	gbm	-0.185134
NIO_UCSF_151922/7	AH00641	2	2	-1	-1	0	0	gbm	-0.272101
NIO_UCSF_152570/3	AH00413	3	3	-1	-1	1	0	oligo	4.84615
NIO_UCSF_152570/1	AH00423	2	2	-1	-1	1	0	oligo	-0.521084
NIO_UCSF_152570/2	AH00410	2	2	-1	-1	1	0	oligo	-0.0461064
NIO_UCSF_152570/4	AH00411	2	2	-1	-1	0	0	oligo	0.649251
NIO_UCSF_152570/5	AH00412	2	2	-1	-1	0	0	oligo	0.355325
NIO_UCSF_152570/6	AH00412	2	2	-1	-1	0	0	oligo	0.400332
NIO_UCSF_153793/1	AH00595	3	3	-1	-1	1	1	gbm	3.67146
NIO_UCSF_153793/2	AH00593	0	0	-1	-1	0	0	gbm	-0.06967
NIO_UCSF_153793/3	AH00414	0	1	-1	-1	0	0	gbm	0.112052
NIO_UCSF_153793/4	AH00414	2	1	-1	-1	0	0	gbm	0.511138
NIO_UCSF_153793/5	AH00421	0	0	-1	-1	0	0	gbm	-1.75249
NIO_UCSF_15421/4	AH00431	3	3	-1	-1	0	0	gbm	0.815075
NIO_UCSF_15421/5	AH00431	3	3	-1	-1	0	0	gbm	3.22411
NIO_UCSF_15421/6	AH00417	2	3	-1	-1	1	1	gbm	1.74428
NIO_UCSF_15421/1	AH00416	1	1	-1	-1	1	1	gbm	-0.904212
NIO_UCSF_15421/2	AH00416	0	1	-1	-1	1	1	gbm	-1.30833
NIO_UCSF_15421/3	AH00415	0	0	-1	-1	1	0	gbm	-1.15248
NIO_UCSF_15421/7	AH00402	2	2	-1	-1	0	1	gbm	3.18428
NIO_UCSF_15421/8	AH00408	3	2	-1	-1	0	0	gbm	2.97791
NIO_UCSF_15421/9	AH00408	2	2	-1	-1	0	0	gbm	2.41859
NIO_UCSF_15421/10	AH00409	2	2	-1	-1	0	0	gbm	0.271197
NIO_UCSF_155204/1	AH00419	3	3	3	-1	-1	-1	astro	3.70074
NIO_UCSF_155204/2	AH00419	3	3	3	-1	-1	-1	astro	2.20867
NIO_UCSF_155204/3	AH00451	3	2	2	-1	-1	-1	astro	1.94538
NIO_UCSF_155204/4	AH00424	3	2	2	-1	-1	-1	astro	1.06205
NIO_UCSF_155204/5	AH00424	3	2	2	-1	-1	-1	astro	1.59696
NIO_UCSF_157889/1	AJ00169	3	3	-1	-1	-1	-1	gbm	3.97053
NIO_UCSF_157889/2	AJ00160	3	3	-1	-1	-1	-1	gbm	4.15601
NIO_UCSF_157889/3	AJ00160	3	3	-1	-1	-1	-1	gbm	3.46267
NIO_UCSF_157889/4	AJ00180	3	3	-1	-1	-1	-1	gbm	2.10368
NIO_UCSF_158976/9	AJ00124	2	3	-1	-1	0	0	gbm	2.44781
NIO_UCSF_158976/11	AJ00119	3	3	-1	-1	0	0	gbm	4.17573
NIO_UCSF_158976/12	AJ00119	3	3	-1	-1	0	0	gbm	4.48828
NIO_UCSF_158976/3	AH00426	3	3	-1	-1	1	1	gbm	1.29393
NIO_UCSF_158976/4	AH00426	3	3	-1	-1	1	1	gbm	2.10189
NIO_UCSF_158976/5	AH00426	3	3	-1	-1	1	1	gbm	2.15234
NIO_UCSF_158976/6	AH00426	3	3	-1	-1	1	1	gbm	1.60737
NIO_UCSF_158976/7	AH00422	2	2	-1	-1	0	0	gbm	0.546815
NIO_UCSF_158976/10	AJ00104	2	2	-1	-1	0	0	gbm	0.559196
NIO_UCSF_158976/8	AJ00170	2	2	-1	-1	0	0	gbm	0.91433
NIO_UCSF_158976/1	AH00425	0	2	-1	-1	0	0	gbm	-1.37791
NIO_UCSF_158976/2	AH00425	0	2	-1	-1	0	0	gbm	-1.79235
NIO_UCSF_158976/13	AJ00116	3	3	-1	-1	1	1	gbm	2.73468
NIO_UCSF_158976/14	AJ00116	3	3	-1	-1	1	1	gbm	2.57151
NIO_UCSF_159525/3	AJ00137	3	3	-1	-1	1	1	gbm	4.79814
NIO_UCSF_159525/4	AJ00137	3	3	-1	-1	1	1	gbm	3.79035
NIO_UCSF_159525/1	AJ00144	1	2	-1	-1	0	0	gbm	0.381562
NIO_UCSF_159525/2	AJ00144	1	2	-1	-1	0	0	gbm	0.13652
NIO_UCSF_159525/5	AJ00132	1	1	-1	-1	0	0	gbm	0.939546
NIO_UCSF_159525/6	AJ00130	0	1	-1	-1	0	0	gbm	-0.0792053
NIO_UCSF_159525/7	AJ00103	2	2	-1	-1	0	0	gbm	-0.775677
NIO_UCSF_159525/8	AJ00187	2	2	-1	-1	0	0	gbm	3.72016
NIO_UCSF_16112/1	AJ00185	3	3	-1	-1	-1	-1	gbm	3.39409
NIO_UCSF_16112/2	AJ00185	3	3	-1	-1	-1	-1	gbm	3.9787
NIO_UCSF_16112/3	AJ00185	3	3	-1	-1	-1	-1	gbm	3.17594
NIO_UCSF_16112/4	AJ01002	0	0	-1	-1	-1	-1	gbm	-2.28171
NIO_UCSF_16112/5	AJ01002	0	0	-1	-1	-1	-1	gbm	-2.94074
NIO_UCSF_16112/6	AJ00182	0	0	-1	-1	-1	-1	gbm	-1.78298
NIO_UCSF_16112/7	AJ00186	0	2	-1	-1	-1	-1	gbm	-2.59289
NIO_UCSF_162688/3	AJ00136	3	3	-1	-1	1	0	gbm	5.25166
NIO_UCSF_162688/4	AJ00136	3	3	-1	-1	1	0	gbm	5.19894
NIO_UCSF_162688/1	AJ00174	0	0	-1	-1	1	0	gbm	-1.26638
NIO_UCSF_162688/2	AJ00174	0	0	-1	-1	1	0	gbm	-0.178067
NIO_UCSF_162688/5	AJ00176	2	2	-1	-1	-1	-1	gbm	0.0553634
NIO_UCSF_162688/6	AJ00105	1	0	-1	-1	-1	-1	gbm	0.724435
NIO_UCSF_162688/7	AJ00106	2	2	-1	-1	-1	-1	gbm	1.25537
NIO_UCSF_163842/4	AJ00109	1	0	0	-1	0	0	astro	-0.631777
NIO_UCSF_163842/1	AJ00175	2	2	2	-1	1	0	astro	4.22562
NIO_UCSF_163842/2	AJ00175	2	2	2	-1	1	0	astro	3.69237
NIO_UCSF_163842/3	AJ00101	3	3	3	-1	1	0	astro	3.92093
NIO_UCSF_163842/8	AJ00129	1	0	0	-1	0	0	astro	0.825495
NIO_UCSF_163842/10	AJ00146	0	0	0	-1	0	0	astro	-0.201499
NIO_UCSF_163842/6	AJ00128	1	2	2	-1	0	0	astro	0.101867
NIO_UCSF_163842/7	AJ00164	0	0	0	-1	0	0	astro	-0.0969214
NIO_UCSF_163842/5	AJ00168	1	1	0	-1	0	0	astro	0.983219
NIO_UCSF_163842/9	AJ00117	1	0	0	-1	1	0	astro	0.24468
NIO_UCSF_1641212/1	AJ00120	1	1	2	-1	1	1	gbm	0.0872956
NIO_UCSF_1641212/2	AJ00120	1	1	2	-1	1	1	gbm	-0.0572543
NIO_UCSF_16494/1	AF00514	3	3	-1	-1	-1	-1	other	4.32726
NIO_UCSF_16494/2	AF00514	3	3	-1	-1	-1	-1	other	5.05724
NIO_UCSF_16494/3	AF00514	3	3	-1	-1	-1	-1	other	4.58115
NIO_UCSF_165353/1	AJ01051	3	3	3	-1	1	0	astro	2.77885
NIO_UCSF_165353/2	AJ01055	0	1	2	-1	1	0	astro	-2.18591
NIO_UCSF_165353/3	AJ01087	3	3	2	-1	1	0	astro	2.66548
NIO_UCSF_165353/4	AJ01085	2	2	2	-1	0	0	astro	1.94021
NIO_UCSF_165353/5	AJ01085	2	2	2	-1	0	0	astro	2.10313
NIO_UCSF_165353/6	AJ01056	0	0	0	-1	0	0	astro	-1.56702
NIO_UCSF_165353/7	AJ01056	0	0	0	-1	0	0	astro	-2.39013
NIO_UCSF_165353/8	AJ00115	1	2	2	-1	1	0	astro	0.107383
NIO_UCSF_165353/9	AJ00172	0	0	0	-1	0	0	astro	-1.59549
NIO_UCSF_165353/10	AJ00113	1	2	2	-1	0	0	astro	0.667934
NIO_UCSF_166498/1	AJ01081	1	0	-1	-1	0	0	gbm	-0.617034
NIO_UCSF_166498/2	AJ01080	1	0	-1	-1	1	0	gbm	0.0676744
NIO_UCSF_166498/3	AJ01089	0	2	-1	-1	1	0	gbm	-2.65867
NIO_UCSF_166498/4	AJ01089	2	2	-1	-1	1	0	gbm	0.863994
NIO_UCSF_167596/2	AJ01061	3	3	3	-1	1	1	astro	4.97729
NIO_UCSF_167596/3	AJ01061	3	3	3	-1	1	1	astro	5.01837
NIO_UCSF_167596/9	AJ01058	3	3	3	-1	1	0	astro	5.42133
NIO_UCSF_167596/10	AJ00152	3	3	3	-1	1	0	astro	5.29415
NIO_UCSF_167596/5	AJ01094	3	3	3	-1	1	0	astro	4.91111
NIO_UCSF_167596/6	AJ01094	3	3	3	-1	1	0	astro	5.95203
NIO_UCSF_167596/11	AJ00107	3	3	3	-1	1	0	astro	4.79326
NIO_UCSF_167596/1	AJ01098	3	3	3	-1	1	0	astro	5.03152
NIO_UCSF_167596/4	AH00420	2	2	0	-1	0	0	astro	-0.53573
NIO_UCSF_167596/7	AJ01088	3	3	3	-1	0	0	astro	4.12671
NIO_UCSF_167596/8	AJ01088	3	3	3	-1	0	0	astro	4.49281
NIO_UCSF_168818/3	AJ00150	2	2	2	-1	0	0	gbm	0.702542
NIO_UCSF_168818/4	AJ00150	2	2	2	-1	0	0	gbm	0.499136
NIO_UCSF_168818/5	AJ01090	2	3	3	-1	0	0	gbm	1.56981
NIO_UCSF_168818/6	AJ01093	2	3	3	-1	0	0	gbm	2.15403
NIO_UCSF_168818/7	AJ01082	2	2	2	-1	0	0	gbm	0.745243
NIO_UCSF_168818/8	AJ01082	2	2	2	-1	0	0	gbm	1.47546
NIO_UCSF_170345/1	AH00407	3	3	3	-1	1	1	gbm	2.36667
NIO_UCSF_170345/2	AH00407	3	3	3	-1	1	1	gbm	2.62582
NIO_UCSF_170345/3	AH00405	2	3	3	-1	1	0	gbm	1.96064
NIO_UCSF_170345/4	AH00404	2	3	3	-1	0	0	gbm	1.29872
NIO_UCSF_170345/5	AH00427	3	3	3	-1	0	0	gbm	3.12761
NIO_UCSF_170345/6	AH00406	1	2	2	-1	0	0	gbm	0.375444
NIO_UCSF_170345/7	AJ01063	2	2	2	-1	0	0	gbm	1.59771
NIO_UCSF_17125/1	AF00769	0	2	2	0	0	-1	astro	-0.400906
NIO_UCSF_171814/8	AH00437	2	2	2	-1	1	0	astro	3.90493
NIO_UCSF_171814/1	AH00438	0	0	0	-1	0	0	astro	-2.38437
NIO_UCSF_171814/2	AH00438	0	0	0	-1	0	0	astro	-1.51815
NIO_UCSF_171814/3	AJ00131	2	2	2	-1	1	0	astro	1.04544
NIO_UCSF_171814/4	AJ00131	1	2	2	-1	1	0	astro	-1.11333
NIO_UCSF_171814/5	AH00435	2	2	2	-1	1	0	astro	2.87488
NIO_UCSF_171814/6	AH00439	2	2	2	-1	1	0	astro	0.272894
NIO_UCSF_171814/7	AH00439	3	2	2	-1	1	0	astro	4.02163
NIO_UCSF_172433/5	AJ01086	0	0	0	-1	0	0	astro	-0.516164
NIO_UCSF_172433/1	AJ01059	2	2	2	-1	1	0	astro	1.93085
NIO_UCSF_172433/2	AJ01059	2	2	2	-1	1	0	astro	2.45232
NIO_UCSF_172433/3	AJ01100	0	0	0	-1	0	0	astro	-1.16869
NIO_UCSF_172433/4	AJ01095	0	0	0	-1	0	0	astro	-0.594783
NIO_UCSF_172433/8	AJ00178	1	0	0	-1	1	0	astro	-0.850274
NIO_UCSF_173244/1	AJ00155	2	2	2	-1	1	0	astro	1.4896
NIO_UCSF_173244/2	AJ00155	2	2	2	-1	1	0	astro	0.818331
NIO_UCSF_173244/6	AJ00121	2	3	3	-1	1	1	astro	-1.20495
NIO_UCSF_173244/7	AJ00121	2	3	3	-1	1	1	astro	2.70878
NIO_UCSF_173244/8	AJ00121	3	3	3	-1	1	1	astro	4.55922
NIO_UCSF_173244/9	AJ01057	2	2	2	-1	1	0	astro	1.06691
NIO_UCSF_173244/10	AJ01057	2	2	2	-1	1	0	astro	1.10742
NIO_UCSF_173244/11	AJ01057	2	2	2	-1	1	0	astro	2.07479
NIO_UCSF_173244/12	AJ01091	2	2	2	-1	1	0	astro	1.21423
NIO_UCSF_173244/13	AJ01092	3	3	3	-1	1	0	astro	4.10524
NIO_UCSF_173244/14	AJ01062	2	2	2	-1	1	0	astro	0.815137
NIO_UCSF_173244/15	AJ00142	2	2	2	-1	1	0	astro	0.557384
NIO_UCSF_173244/16	AJ00153	2	2	2	-1	1	0	astro	-1.38954
NIO_UCSF_173244/17	AJ00153	2	2	2	-1	1	0	astro	-0.757673
NIO_UCSF_174524/1	AJ00158	3	3	-1	-1	1	1	gbm	2.51576
NIO_UCSF_174524/2	AJ00158	3	3	-1	-1	1	1	gbm	3.92536
NIO_UCSF_174524/3	AJ00138	0	1	-1	-1	0	0	gbm	-1.31229
NIO_UCSF_174524/4	AJ00127	0	0	-1	-1	1	0	gbm	-0.0697848
NIO_UCSF_17593/3	AJ00165	3	3	-1	-1	1	0	gbm	3.93652
NIO_UCSF_17593/4	AJ00123	3	3	-1	-1	1	0	gbm	1.8608
NIO_UCSF_17593/1	AJ00126	0	0	-1	-1	1	0	gbm	-1.11266
NIO_UCSF_17593/2	AJ00126	1	0	-1	-1	1	0	gbm	-0.592018
NIO_UCSF_17593/5	AJ00118	3	3	-1	-1	1	0	gbm	3.12125
NIO_UCSF_17593/6	AJ00135	0	0	-1	-1	0	0	gbm	1.06371
NIO_UCSF_17593/7	AJ00143	0	0	-1	-1	1	0	gbm	0.055947
NIO_UCSF_17593/8	AJ00133	1	2	-1	-1	1	0	gbm	-0.25784
NIO_UCSF_17593/9	AJ00110	0	0	-1	-1	0	0	gbm	-1.2372
NIO_UCSF_176812/2	AJ00831	3	3	-1	-1	1	0	oligo	3.7451
NIO_UCSF_176812/5	AJ00834	3	3	-1	-1	1	0	oligo	1.36636
NIO_UCSF_176812/1	AJ00832	0	0	-1	-1	0	0	oligo	-1.297
NIO_UCSF_176812/3	AJ00829	3	3	-1	-1	0	0	oligo	2.53606
NIO_UCSF_176812/4	AJ00829	3	3	-1	-1	0	0	oligo	2.96702
NIO_UCSF_176812/6	AJ00837	0	2	-1	-1	0	0	oligo	-2.28075
NIO_UCSF_176812/7	AJ01325	0	0	-1	-1	0	0	oligo	-1.57314
NIO_UCSF_176812/9	AJ01326	0	0	-1	-1	0	0	oligo	-1.6278
NIO_UCSF_176812/10	AJ01322	0	2	-1	-1	0	0	oligo	-1.23365
NIO_UCSF_176812/11	AJ01320	0	0	-1	-1	0	0	oligo	-1.35138
NIO_UCSF_176812/12	AJ01070	0	2	-1	-1	0	0	oligo	-1.8799
NIO_UCSF_176812/8	AJ01327	0	2	-1	-1	0	0	oligo	-1.04508
NIO_UCSF_1771257/1	AJ00935	3	3	-1	-1	1	1	gbm	2.22239
NIO_UCSF_1771257/2	AJ00007	2	2	-1	-1	1	0	gbm	0.659128
NIO_UCSF_1771257/3	AJ01329	2	2	-1	-1	0	0	gbm	1.01352
NIO_UCSF_1771257/4	AJ01323	2	2	-1	-1	1	0	gbm	1.22388
NIO_UCSF_1771257/5	AJ01321	0	0	-1	-1	1	0	gbm	-1.16387
NIO_UCSF_1771257/6	AJ01321	0	0	-1	-1	1	0	gbm	-1.34761
NIO_UCSF_1771257/7	AJ00134	0	0	-1	-1	1	0	gbm	-1.19534
NIO_UCSF_178117/1	AJ01077	2	2	-1	-1	1	0	gbm	0.928767
NIO_UCSF_178117/2	AJ01077	2	2	-1	-1	1	0	gbm	0.242191
NIO_UCSF_178117/13	AJ00003	2	2	-1	-1	0	0	gbm	-0.0186284
NIO_UCSF_178117/3	AJ01078	0	2	-1	-1	0	0	gbm	-1.09698
NIO_UCSF_178117/4	AJ01084	2	2	-1	-1	0	0	gbm	-0.0728506
NIO_UCSF_178117/5	AJ00005	2	2	-1	-1	0	0	gbm	-0.852951
NIO_UCSF_178117/6	AJ00006	0	2	-1	-1	0	0	gbm	-1.6334
NIO_UCSF_178117/7	AJ00004	3	3	-1	-1	1	1	gbm	3.84554
NIO_UCSF_178117/8	AJ00001	0	2	-1	-1	0	0	gbm	-0.558265
NIO_UCSF_178117/9	AJ00936	0	2	-1	-1	0	0	gbm	-1.02912
NIO_UCSF_178117/10	AJ00924	2	2	-1	-1	0	0	gbm	-0.242185
NIO_UCSF_178117/11	AJ00920	0	2	-1	-1	0	0	gbm	-1.23608
NIO_UCSF_178117/12	AJ00920	2	2	-1	-1	0	0	gbm	-1.16871
NIO_UCSF_179469/1	AJ00915	2	2	2	-1	1	0	oligo	0.759579
NIO_UCSF_179469/2	AJ00916	3	3	3	-1	1	0	oligo	1.73822
NIO_UCSF_179469/3	AJ00916	3	3	3	-1	1	0	oligo	1.42529
NIO_UCSF_179469/4	AJ00916	3	3	3	-1	1	0	oligo	1.92821
NIO_UCSF_179469/5	AJ00918	2	2	2	-1	1	1	oligo	-0.0312696
NIO_UCSF_179469/6	AJ00918	0	2	2	-1	1	1	oligo	-0.808065
NIO_UCSF_179469/7	AJ00010	2	2	2	-1	1	1	oligo	-0.0698311
NIO_UCSF_179469/8	AJ00010	2	2	2	-1	1	1	oligo	0.942301
NIO_UCSF_179469/9	AJ00010	2	2	2	-1	1	1	oligo	-0.0205765
NIO_UCSF_179469/10	AJ00887	2	2	2	-1	0	0	oligo	0.150185
NIO_UCSF_179469/11	AJ00895	0	2	2	-1	0	0	oligo	0.0137492
NIO_UCSF_179469/12	AJ00893	2	2	2	-1	0	0	oligo	0.185656
NIO_UCSF_179469/13	AJ00901	2	2	2	-1	1	0	oligo	1.12318
NIO_UCSF_179469/14	AJ00902	2	2	2	-1	0	0	oligo	0.652702
NIO_UCSF_180426/3	AJ00894	2	2	2	-1	1	0	oligo	0.0193601
NIO_UCSF_180426/4	AJ00894	2	2	2	-1	1	0	oligo	1.14756
NIO_UCSF_180426/1	AJ00032	2	0	0	-1	0	0	oligo	-0.757773
NIO_UCSF_180426/2	AJ00032	1	0	0	-1	0	0	oligo	-0.746095
NIO_UCSF_180426/5	AJ00899	0	0	0	-1	1	0	oligo	-0.576301
NIO_UCSF_180426/6	AJ00898	0	0	0	-1	0	0	oligo	-0.978687
NIO_UCSF_180426/7	AJ00900	0	1	1	-1	0	0	oligo	-0.394422
NIO_UCSF_180426/8	AJ00906	2	2	1	-1	0	0	oligo	-0.0306405
NIO_UCSF_180426/9	AJ00908	0	0	0	-1	0	0	oligo	-1.69057
NIO_UCSF_180426/10	AJ00908	0	0	0	-1	0	0	oligo	-0.108634
NIO_UCSF_180426/11	AJ00904	0	0	0	-1	0	0	oligo	-0.0863709
NIO_UCSF_181474/8	AJ00068	0	0	0	-1	-1	-1	astro	-0.715809
NIO_UCSF_181474/1	AJ00907	3	3	3	-1	-1	-1	astro	0.0564716
NIO_UCSF_181474/2	AJ00903	2	3	3	-1	-1	-1	astro	0.34479
NIO_UCSF_181474/6	AJ00912	0	0	2	-1	-1	-1	astro	-0.045849
NIO_UCSF_181474/7	AJ00910	0	0	0	-1	-1	-1	astro	-1.1771
NIO_UCSF_181474/3	AJ00914	2	2	2	-1	-1	-1	astro	-0.193881
NIO_UCSF_181474/4	AJ00913	0	0	0	-1	-1	-1	astro	-0.651964
NIO_UCSF_181474/5	AJ00911	0	0	0	-1	-1	-1	astro	0.288325
NIO_UCSF_18179/10	AF00453	2	3	3	-1	0	0	gbm	0.0852109
NIO_UCSF_18179/3	AF00422	3	3	3	-1	1	1	gbm	0.542565
NIO_UCSF_18179/11	AF00528	3	3	3	-1	0	0	gbm	3.04498
NIO_UCSF_18179/13	AF00528	3	3	3	-1	0	0	gbm	4.43212
NIO_UCSF_18179/12	AF00074	2	2	1	-1	0	0	gbm	-0.131672
NIO_UCSF_18179/9	AF00435	1	2	1	-1	0	0	gbm	0.165369
NIO_UCSF_18179/1	AF00447	2	2	2	-1	1	0	gbm	1.69435
NIO_UCSF_18179/5	AF00447	2	2	2	-1	1	0	gbm	1.36963
NIO_UCSF_18179/2	AF00413	2	2	2	-1	1	1	gbm	1.69419
NIO_UCSF_18179/8	AF00413	2	2	2	-1	1	1	gbm	0.540368
NIO_UCSF_18179/6	AF00511	2	3	3	-1	0	0	gbm	2.23962
NIO_UCSF_18179/7	AF00511	3	3	3	-1	0	0	gbm	3.15121
NIO_UCSF_182850/1	AJ00341	3	3	-1	-1	-1	-1	gbm	1.93484
NIO_UCSF_183301/1	AJ00373	3	3	3	-1	1	1	astro	2.26615
NIO_UCSF_183301/2	AJ00373	3	3	3	-1	1	1	astro	2.21694
NIO_UCSF_183301/3	AJ00373	3	3	3	-1	1	1	astro	2.23721
NIO_UCSF_183301/4	AJ01233	1	2	2	-1	1	0	astro	0.358978
NIO_UCSF_183301/5	AJ00376	0	1	1	-1	1	0	astro	-0.701531
NIO_UCSF_183301/7	AJ01227	0	0	0	-1	0	0	astro	-1.49594
NIO_UCSF_183301/8	AJ01231	2	2	2	-1	0	0	astro	1.33056
NIO_UCSF_189497/1	AJ01130	2	3	-1	-1	1	1	gbm	1.55184
NIO_UCSF_189497/2	AJ01130	3	3	-1	-1	1	1	gbm	4.58175
NIO_UCSF_189497/3	AJ01157	2	2	-1	-1	1	0	gbm	0.322357
NIO_UCSF_189497/4	AJ01158	2	2	-1	-1	0	0	gbm	-0.926829
NIO_UCSF_189497/5	AJ01158	0	2	-1	-1	0	0	gbm	-1.81089
NIO_UCSF_189497/6	AJ01161	2	2	-1	-1	0	0	gbm	0.71954
NIO_UCSF_189497/7	AJ01161	1	2	-1	-1	0	0	gbm	-0.675569
NIO_UCSF_189497/8	AJ01218	2	3	-1	-1	1	0	gbm	0.763829
NIO_UCSF_189497/9	AJ01210	2	2	-1	-1	1	0	gbm	-0.236093
NIO_UCSF_189497/10	AJ01208	3	2	-1	-1	0	0	gbm	1.20962
NIO_UCSF_189497/11	AJ01208	3	2	-1	-1	0	0	gbm	1.39458
NIO_UCSF_190864/1	AJ01197	3	3	-1	-1	1	1	gbm	1.42024
NIO_UCSF_190864/2	AJ01197	3	3	-1	-1	1	1	gbm	2.33779
NIO_UCSF_190864/3	AJ01230	0	0	-1	-1	1	0	gbm	-0.219102
NIO_UCSF_190864/4	AJ01223	2	2	-1	-1	0	0	gbm	0.339572
NIO_UCSF_190864/5	AJ01223	2	2	-1	-1	0	0	gbm	-1.49224
NIO_UCSF_190864/6	AJ01214	3	3	-1	-1	1	0	gbm	0.889239
NIO_UCSF_191784/1	AJ01206	3	3	-1	-1	1	1	gbm	2.41866
NIO_UCSF_191784/2	AJ01206	3	3	-1	-1	1	1	gbm	4.82342
NIO_UCSF_191784/3	AJ00331	2	2	-1	-1	1	1	gbm	-0.171164
NIO_UCSF_191784/4	AJ00331	3	2	-1	-1	1	1	gbm	0.156892
NIO_UCSF_191784/5	AJ01159	3	3	-1	-1	1	1	gbm	2.06139
NIO_UCSF_191784/6	AJ01177	3	3	-1	-1	1	1	gbm	1.28451
NIO_UCSF_191784/7	AJ01163	2	2	-1	-1	1	0	gbm	0.0185777
NIO_UCSF_192968/1	AJ01196	1	0	0	-1	0	0	astro	-1.83298
NIO_UCSF_192968/2	AJ01200	3	3	3	-1	1	0	astro	3.30244
NIO_UCSF_192968/3	AJ01229	2	2	2	-1	0	0	astro	-0.106727
NIO_UCSF_192968/4	AJ01204	2	1	1	-1	0	0	astro	-0.689195
NIO_UCSF_192968/5	AJ01160	2	2	2	-1	0	0	astro	-0.312197
NIO_UCSF_192968/6	AJ01221	0	0	0	-1	0	0	astro	-0.797687
NIO_UCSF_192968/7	AJ01221	0	0	0	-1	0	0	astro	-3.09061
NIO_UCSF_19383/1	AM01366	2	2	-1	-1	1	1	gbm	1.56446
NIO_UCSF_19383/2	AM01366	3	2	-1	-1	1	1	gbm	0.684657
NIO_UCSF_19383/3	AM01366	3	2	-1	-1	1	1	gbm	2.78727
NIO_UCSF_19383/4	AM01371	3	3	-1	-1	1	0	gbm	4.65294
NIO_UCSF_19383/5	AM01370	2	2	-1	-1	1	0	gbm	0.303655
NIO_UCSF_19383/6	AM01374	0	0	-1	-1	0	0	gbm	-1.23799
NIO_UCSF_19383/7	AM01362	3	2	-1	-1	1	0	gbm	1.33752
NIO_UCSF_19383/8	AM01480	2	2	-1	-1	0	0	gbm	-0.497714
NIO_UCSF_197741/1	AM01365	0	0	-1	-1	0	0	gbm	-4.06931
NIO_UCSF_197741/2	AM01365	0	0	-1	-1	0	0	gbm	-2.96978
NIO_UCSF_197741/3	AM01430	2	2	-1	-1	1	1	gbm	1.03845
NIO_UCSF_197741/4	AM01430	2	2	-1	-1	1	1	gbm	-1.69288
NIO_UCSF_197741/5	AM01391	2	2	-1	-1	1	1	gbm	-1.89118
NIO_UCSF_197741/6	AM01391	2	2	-1	-1	1	1	gbm	-1.04642
NIO_UCSF_197741/7	AM01372	3	3	-1	-1	1	1	gbm	2.46485
NIO_UCSF_197741/8	AM01372	3	3	-1	-1	1	1	gbm	3.05943
NIO_UCSF_197741/9	AM01383	3	3	-1	-1	0	0	gbm	4.35932
NIO_UCSF_197741/10	AM01388	2	3	-1	-1	0	0	gbm	-0.046073
NIO_UCSF_197741/11	AM01429	2	2	-1	-1	0	0	gbm	-0.0945541
NIO_UCSF_197741/12	AM01473	2	3	-1	-1	0	0	gbm	3.74704
NIO_UCSF_197741/13	AM01401	3	3	-1	-1	0	0	gbm	2.94493
NIO_UCSF_197741/14	AM01389	2	2	-1	-1	0	0	gbm	0.492896
NIO_UCSF_21342/1	AF00093	0	0	-1	-1	0	0	gbm	-0.51678
NIO_UCSF_21342/2	AF00068	3	3	-1	-1	1	1	gbm	4.04669
NIO_UCSF_21342/3	AF00409	1	1	-1	-1	1	1	gbm	1.11719
NIO_UCSF_21342/4	AF00067	1	2	-1	-1	1	1	gbm	1.49864
NIO_UCSF_21342/5	AF00067	2	2	-1	-1	1	1	gbm	1.17894
NIO_UCSF_21342/6	AF00090	2	2	-1	0	0	0	gbm	0.229608
NIO_UCSF_21342/7	AF00051	2	2	-1	0	0	0	gbm	0.181494
NIO_UCSF_21342/8	AF00125	3	3	-1	1	0	0	gbm	2.4611
NIO_UCSF_21342/9	AF00125	3	3	-1	1	0	0	gbm	3.25023
NIO_UCSF_23403/6	AF00084	2	3	3	1	1	0	astro	3.99268
NIO_UCSF_23403/7	AF00084	2	3	3	1	1	0	astro	4.14842
NIO_UCSF_23403/8	AF00689	2	2	2	-1	1	0	astro	2.74874
NIO_UCSF_23403/9	AF00091	2	2	2	-1	1	0	astro	2.40788
NIO_UCSF_23403/10	AF00036	2	3	3	-1	1	0	astro	1.84206
NIO_UCSF_23403/11	AF00036	2	3	3	-1	1	0	astro	1.69919
NIO_UCSF_2427/1	AF00394	3	3	3	-1	1	1	gbm	1.46016
NIO_UCSF_25642/1	AF00366	0	0	0	0	0	0	astro	-1.07725
NIO_UCSF_25642/2	AF00366	0	0	0	0	0	0	astro	-1.05821
NIO_UCSF_25642/3	AF00788	3	3	3	-1	1	1	astro	5.37622
NIO_UCSF_25642/4	AF00816	2	3	3	-1	1	0	astro	0.211546
NIO_UCSF_25642/5	AF00796	2	2	3	-1	0	0	astro	-0.34679
NIO_UCSF_25642/6	AF00798	2	2	2	-1	0	0	astro	-0.101289
NIO_UCSF_26162/1	AF00783	2	2	-1	-1	-1	-1	gbm	1.27469
NIO_UCSF_26162/2	AF00783	2	2	-1	-1	-1	-1	gbm	1.5051
NIO_UCSF_26162/3	AF00548	1	0	-1	-1	-1	-1	gbm	3.37233
NIO_UCSF_26162/4	AF00249	3	3	-1	-1	-1	-1	gbm	5.13203
NIO_UCSF_26162/5	AF00392	2	2	-1	-1	-1	-1	gbm	0.0148172
NIO_UCSF_27254/1	AF00345	3	3	3	-1	-1	1	gbm	-0.0872373
NIO_UCSF_27254/2	AF00345	3	3	3	-1	-1	1	gbm	0.418247
NIO_UCSF_27254/3	AF00345	2	3	3	-1	-1	1	gbm	0.261256
NIO_UCSF_27254/4	AF00345	2	3	3	-1	-1	1	gbm	0.160114
NIO_UCSF_27254/5	AF00504	3	3	3	-1	-1	1	gbm	2.28723
NIO_UCSF_27254/6	AF00504	2	3	3	-1	-1	1	gbm	4.8565
NIO_UCSF_27254/7	AF00488	1	1	0	-1	-1	-1	gbm	-0.477138
NIO_UCSF_27254/9	AF00488	0	1	0	-1	-1	-1	gbm	-0.101859
NIO_UCSF_29302/1	AF00480	3	3	-1	-1	1	1	gbm	3.36701
NIO_UCSF_29302/2	AF00480	3	3	-1	-1	1	1	gbm	4.26041
NIO_UCSF_30_2781/1	AF00640	3	3	3	1	1	1	astro	2.95236
NIO_UCSF_30_2781/2	AF00640	3	3	3	1	1	1	astro	3.10828
NIO_UCSF_30_2781/3	AF00467	3	3	3	-1	1	0	astro	1.80882
NIO_UCSF_30_2781/6	AF00467	3	3	3	-1	1	0	astro	3.06837
NIO_UCSF_30_2781/4	AF00317	3	3	-1	-1	1	0	astro	4.4636
NIO_UCSF_30_2781/5	AF00374	3	3	3	-1	1	0	astro	3.90358
NIO_UCSF_30_2781/7	AF00374	3	3	3	-1	1	0	astro	4.59306
NIO_UCSF_36138/4	AG01573	3	3	-1	1	1	1	gbm	2.39452
NIO_UCSF_3833/1	AF01281	0	1	0	-1	0	0	other	-0.515626
NIO_UCSF_3833/2	AF01281	0	1	0	-1	0	0	other	-0.493225
NIO_UCSF_3833/3	AF01281	1	1	0	-1	0	0	other	-0.10193
NIO_UCSF_3833/4	AF01281	1	1	0	-1	0	0	other	-1.1501
NIO_UCSF_3833/5	AF01281	1	1	0	-1	0	0	other	2.09712
NIO_UCSF_3833/6	AF01275	3	2	1	-1	0	1	other	-0.44941
NIO_UCSF_3833/7	AF01275	2	2	1	-1	0	1	other	-0.844901
NIO_UCSF_3833/8	AF01265	3	3	3	-1	0	0	other	2.89949
NIO_UCSF_3833/9	AF01265	1	3	3	-1	0	0	other	1.75226
NIO_UCSF_3833/10	AF00119	3	2	2	-1	0	1	other	3.00672
NIO_UCSF_40823/10	AF00048	2	2	-1	0	0	0	gbm	0.41966
NIO_UCSF_40823/2	AF00086	3	3	-1	1	1	1	gbm	4.09318
NIO_UCSF_40823/3	AF00086	3	3	-1	1	1	1	gbm	5.37156
NIO_UCSF_40823/4	AF00771	0	3	-1	-1	1	1	gbm	0.985837
NIO_UCSF_40823/5	AF00771	3	3	-1	-1	1	1	gbm	5.12705
NIO_UCSF_40823/6	AF00771	3	3	-1	-1	1	1	gbm	3.93556
NIO_UCSF_40823/7	AF00052	3	3	-1	1	1	1	gbm	5.71206
NIO_UCSF_40823/9	AF00088	2	2	-1	1	0	0	gbm	-0.364357
NIO_UCSF_40823/11	AF00088	2	2	-1	1	0	0	gbm	-0.268608
NIO_UCSF_40823/8	AF00065	0	1	-1	0	1	0	gbm	-0.559615
NIO_UCSF_40823/12	AF00065	1	1	-1	0	1	0	gbm	-0.303549
NIO_UCSF_40823/1	AF00061	0	0	-1	0	0	0	gbm	-0.641497
NIO_UCSF_41471/1	AG01519	0	1	-1	-1	1	0	gbm	-0.879089
NIO_UCSF_41471/2	AF00049	3	3	-1	-1	1	1	gbm	4.44705
NIO_UCSF_41471/3	AG01518	0	1	-1	1	1	0	gbm	-0.517288
NIO_UCSF_41471/4	AG01555	0	3	-1	1	0	0	gbm	-0.280609
NIO_UCSF_42790/4	AG01557	2	3	3	-1	0	0	oligo	1.82439
NIO_UCSF_42790/5	AG01558	2	2	2	-1	0	0	oligo	0.791343
NIO_UCSF_42790/6	AG01576	1	2	2	-1	0	0	oligo	-1.29548
NIO_UCSF_42790/7	AG01578	1	2	2	-1	0	0	oligo	-1.07812
NIO_UCSF_42790/8	AG01543	3	3	3	-1	0	0	oligo	2.92973
NIO_UCSF_42790/1	AG01544	3	3	3	-1	0	0	oligo	3.67362
NIO_UCSF_42790/2	AG01544	3	3	3	-1	0	0	oligo	3.13872
NIO_UCSF_42790/3	AG01596	1	2	2	-1	0	0	oligo	-1.29709
NIO_UCSF_4392/5	AG01535	1	2	-1	-1	0	0	astro	-0.0614941
NIO_UCSF_4392/6	AG01536	1	2	-1	-1	0	0	astro	-1.40322
NIO_UCSF_4392/7	AG01536	0	2	-1	-1	0	0	astro	-1.02439
NIO_UCSF_4392/8	AG01559	2	2	2	-1	0	0	astro	-0.671193
NIO_UCSF_4392/9	AG01572	1	2	2	-1	1	0	astro	-0.241675
NIO_UCSF_4392/3	AG01545	3	3	3	-1	1	0	astro	2.79336
NIO_UCSF_4392/4	AG01545	2	3	3	-1	1	0	astro	0.800362
NIO_UCSF_4392/1	AG01537	3	3	3	-1	1	0	astro	1.57504
NIO_UCSF_4392/2	AG01537	3	3	3	-1	1	0	astro	1.53056
NIO_UCSF_44172/1	AG01554	3	3	3	-1	1	0	astro	1.56323
NIO_UCSF_44172/7	AG01571	2	0	0	-1	1	0	astro	0.98049
NIO_UCSF_44172/6	AG01552	2	2	2	-1	0	0	astro	-0.412576
NIO_UCSF_44172/5	AG01584	3	2	2	-1	1	0	astro	2.35862
NIO_UCSF_44172/2	AG01554	3	3	3	-1	1	0	astro	2.49601
NIO_UCSF_44172/3	AG01554	3	3	3	-1	1	0	astro	2.17949
NIO_UCSF_45948/1	AG01594	3	2	-1	-1	0	0	other	0.0671067
NIO_UCSF_45948/2	AG01594	1	2	-1	-1	0	0	other	-0.12991
NIO_UCSF_45948/3	AG01592	2	2	-1	-1	0	0	other	-0.233136
NIO_UCSF_45948/4	AG01598	2	2	-1	-1	0	0	other	-0.777371
NIO_UCSF_45948/5	AG01583	0	0	-1	-1	0	0	other	-2.16374
NIO_UCSF_45948/6	AG01561	1	0	-1	-1	0	0	other	-1.73764
NIO_UCSF_4723/1	AG01574	2	2	2	-1	1	0	astro	1.8859
NIO_UCSF_4723/2	AG01574	2	2	2	-1	1	0	astro	0.556723
NIO_UCSF_4723/3	AG01575	3	3	3	-1	1	0	astro	3.34641
NIO_UCSF_4723/4	AG01575	3	3	3	-1	1	0	astro	2.73835
NIO_UCSF_4723/5	AG01581	3	3	3	-1	1	0	astro	4.89429
NIO_UCSF_4723/6	AG01568	2	2	2	-1	1	0	astro	1.82121
NIO_UCSF_4723/7	AG01569	2	2	2	-1	1	0	astro	0.73788
NIO_UCSF_49407/1	AF01360	2	3	2	-1	1	0	oligo	0.271378
NIO_UCSF_49407/2	AF01360	3	3	2	-1	1	0	oligo	0.284138
NIO_UCSF_49407/3	AF01360	1	3	2	-1	1	0	oligo	-0.98227
NIO_UCSF_49407/4	AF01438	3	3	3	-1	1	0	oligo	1.24537
NIO_UCSF_49407/5	AF01438	3	3	3	-1	1	0	oligo	1.43713
NIO_UCSF_49407/6	AF01442	0	1	0	-1	1	0	oligo	-0.977827
NIO_UCSF_49407/7	AF01473	0	1	0	-1	1	0	oligo	-5.1178
NIO_UCSF_49407/8	AF01396	3	3	3	-1	1	0	oligo	3.35042
NIO_UCSF_49407/9	AF01396	3	3	3	-1	1	0	oligo	4.6243
NIO_UCSF_50892/1	AF01443	3	3	-1	-1	1	0	gbm	1.11106
NIO_UCSF_50892/2	AF01443	3	3	-1	-1	1	0	gbm	1.0144
NIO_UCSF_52273/1	AF01462	0	0	-1	-1	0	0	gbm	-0.831287
NIO_UCSF_52273/2	AF01462	0	0	-1	-1	0	0	gbm	-1.52801
NIO_UCSF_52273/9	AF01423	3	3	-1	-1	1	1	gbm	2.75483
NIO_UCSF_52273/3	AF01372	2	2	-1	-1	1	0	gbm	-1.18764
NIO_UCSF_52273/4	AF01372	1	2	-1	-1	1	0	gbm	-1.69677
NIO_UCSF_52273/5	AF01466	2	2	-1	-1	1	0	gbm	-0.619608
NIO_UCSF_52273/6	AF01458	0	2	-1	-1	1	0	gbm	-1.11119
NIO_UCSF_52273/7	AF01386	1	2	-1	-1	1	0	gbm	-1.80364
NIO_UCSF_52273/8	AF01383	1	2	-1	-1	1	0	gbm	0.30497
NIO_UCSF_55237/2	AF01434	2	2	-1	-1	1	0	other	-0.406204
NIO_UCSF_55237/3	AF01440	0	0	-1	-1	1	0	other	-2.14411
NIO_UCSF_55237/5	AG01553	3	3	-1	-1	-1	-1	other	1.28312
NIO_UCSF_55237/6	AG01553	3	3	-1	-1	-1	-1	other	2.02406
NIO_UCSF_55237/1	AF01417	1	2	-1	-1	0	0	other	-2.03866
NIO_UCSF_58562/3	AF00175	3	3	3	-1	1	1	astro	3.68674
NIO_UCSF_58562/5	AF00708	2	2	2	-1	0	0	astro	0.107543
NIO_UCSF_58562/7	AF00716	0	0	0	-1	0	0	astro	-0.65134
NIO_UCSF_58562/6	AF00709	2	2	2	-1	0	0	astro	-0.388429
NIO_UCSF_58562/1	AF01455	0	0	0	-1	0	0	astro	-0.882638
NIO_UCSF_58562/2	AF01455	0	0	0	-1	0	0	astro	-1.10387
NIO_UCSF_58562/4	AF01422	2	2	2	-1	0	0	astro	2.50861
NIO_UCSF_60473/1	AF01421	3	3	-1	1	1	1	gbm	1.76735
NIO_UCSF_60473/2	AF01397	3	3	-1	-1	1	1	gbm	3.26116
NIO_UCSF_60473/3	AF01441	0	3	-1	-1	1	0	gbm	-0.65207
NIO_UCSF_60473/4	AF01393	0	2	-1	-1	1	0	gbm	-1.99035
NIO_UCSF_60473/5	AF01465	2	3	-1	-1	1	1	gbm	-1.05335
NIO_UCSF_60473/6	AF01468	3	3	-1	-1	1	1	gbm	2.76044
NIO_UCSF_60473/7	AF01415	3	3	-1	-1	0	0	gbm	2.10596
NIO_UCSF_60473/8	AF01415	2	3	-1	-1	0	0	gbm	1.54299
NIO_UCSF_60473/9	AF00552	0	0	-1	1	1	0	gbm	-1.10672
NIO_UCSF_63756/1	AF00348	0	0	-1	-1	1	0	gbm	-1.66517
NIO_UCSF_63756/2	AG01577	3	3	-1	-1	1	1	gbm	2.73058
NIO_UCSF_63756/3	AG01577	2	3	-1	-1	1	1	gbm	1.94575
NIO_UCSF_63756/4	AF01454	0	1	-1	-1	1	0	gbm	-0.648795
NIO_UCSF_63756/5	AF01410	2	2	-1	-1	1	0	gbm	0.0141721
NIO_UCSF_63756/6	AF01464	2	2	-1	-1	1	0	gbm	-1.28262
NIO_UCSF_63756/7	AF01362	2	2	-1	-1	1	0	gbm	-0.00654175
NIO_UCSF_64492/3	AF00581	3	3	3	-1	1	1	astro	2.65204
NIO_UCSF_64492/4	AF00581	3	3	3	-1	1	1	astro	2.80021
NIO_UCSF_64492/6	AF00565	2	2	2	-1	0	1	astro	-0.2173
NIO_UCSF_64492/7	AF00565	2	2	2	-1	0	1	astro	-0.306416
NIO_UCSF_64492/5	AF00639	2	2	2	-1	1	0	astro	-0.455187
NIO_UCSF_64492/1	AF01411	3	3	3	-1	1	0	astro	3.43464
NIO_UCSF_64492/2	AF00631	3	3	3	-1	1	0	astro	3.57876
NIO_UCSF_6550/1	AF00165	3	3	3	-1	1	0	astro	2.89512
NIO_UCSF_6550/2	AF00144	2	2	2	-1	1	0	astro	0.340316
NIO_UCSF_6550/3	AF00953	2	3	3	-1	1	0	astro	1.3336
NIO_UCSF_6550/4	AF00933	2	2	2	-1	-1	-1	astro	1.77955
NIO_UCSF_6550/5	AF01242	1	2	2	-1	1	1	astro	-0.56133
NIO_UCSF_6550/6	AF01253	2	2	2	-1	-1	-1	astro	-0.234602
NIO_UCSF_6550/7	AF01291	1	1	2	-1	-1	-1	astro	-0.302403
NIO_UCSF_6550/8	AF01283	2	2	2	-1	-1	-1	astro	1.66767
NIO_UCSF_6550/9	AF01254	2	2	2	-1	-1	-1	astro	0.255742
NIO_UCSF_65823/1	AF00756	2	2	-1	-1	1	1	gbm	-0.39884
NIO_UCSF_66486/6	AF00496	2	2	2	-1	1	0	astro	1.2283
NIO_UCSF_66486/8	AF00637	3	2	2	-1	1	0	astro	1.78213
NIO_UCSF_66486/2	AF01390	3	2	2	-1	1	0	astro	1.36212
NIO_UCSF_66486/3	AF01389	3	2	2	-1	1	0	astro	2.0582
NIO_UCSF_66486/4	AF01389	3	2	2	-1	1	0	astro	2.72583
NIO_UCSF_66486/5	AF00536	0	1	1	-1	0	0	astro	-0.80783
NIO_UCSF_66486/7	AF00536	0	1	1	-1	0	0	astro	-0.683828
NIO_UCSF_66486/1	AF01388	2	2	2	-1	1	0	astro	0.494035
NIO_UCSF_68360/2	AF01467	3	3	-1	-1	1	1	gbm	1.66976
NIO_UCSF_68360/1	AF01358	2	2	-1	-1	1	1	gbm	-2.09227
NIO_UCSF_68360/3	AG01593	0	1	-1	-1	1	0	gbm	-1.63906
NIO_UCSF_68360/4	AF01359	1	1	-1	-1	1	0	gbm	-0.176006
NIO_UCSF_68360/5	AF00671	3	2	-1	-1	1	0	gbm	4.99617
NIO_UCSF_69567/2	AF00495	3	3	-1	-1	0	0	gbm	2.34083
NIO_UCSF_69567/3	AF00699	1	2	-1	-1	1	0	gbm	0.399524
NIO_UCSF_69567/4	AF00675	1	0	-1	-1	0	0	gbm	-0.256338
NIO_UCSF_69567/1	AF00167	3	3	-1	1	1	1	gbm	3.33183
NIO_UCSF_70288/1	AF00751	0	0	-1	-1	0	-1	other	-3.2672
NIO_UCSF_70288/4	AF00751	0	0	-1	-1	0	-1	other	-2.83912
NIO_UCSF_70288/2	AF00672	0	0	-1	-1	0	-1	other	-2.77796
NIO_UCSF_70288/3	AF00672	0	0	-1	-1	0	-1	other	-2.0273
NIO_UCSF_71447/2	AF00519	3	3	3	-1	1	1	gbm	5.44942
NIO_UCSF_72131/1	AF00717	2	2	2	0	0	0	astro	-1.22315
NIO_UCSF_72131/2	AF00717	2	2	2	0	0	0	astro	-1.80127
NIO_UCSF_72131/3	AF00700	2	2	2	0	1	1	astro	0.441309
NIO_UCSF_72131/4	AF00700	2	2	2	0	1	1	astro	-0.518168
NIO_UCSF_72131/5	AF00044	2	2	2	0	1	0	astro	-0.973586
NIO_UCSF_72131/6	AF00664	2	3	3	0	1	0	astro	1.60094
NIO_UCSF_72131/7	AF00667	2	3	3	0	1	0	astro	0.0148338
NIO_UCSF_7399/5	AF00682	2	2	-1	-1	0	0	oligo	-1.17636
NIO_UCSF_7399/2	AF00658	3	3	-1	-1	1	0	oligo	5.23691
NIO_UCSF_7399/4	AF00669	0	0	-1	-1	0	0	oligo	-1.02818
NIO_UCSF_7399/6	AF00660	2	2	-1	-1	1	0	oligo	-1.78452
NIO_UCSF_7399/7	AF00660	2	2	-1	-1	1	0	oligo	-1.21032
NIO_UCSF_7399/1	AF00168	2	2	-1	-1	0	0	oligo	0.605505
NIO_UCSF_7399/3	AF00584	1	1	-1	-1	0	0	oligo	-0.765933
NIO_UCSF_74388/2	AF00306	3	3	3	-1	1	1	oligo	3.23339
NIO_UCSF_74388/6	AF00363	0	2	2	-1	0	0	oligo	-1.46253
NIO_UCSF_74388/1	AF00681	0	0	0	-1	1	1	oligo	-0.918164
NIO_UCSF_74388/5	AF00632	1	1	0	-1	0	0	oligo	-1.65666
NIO_UCSF_74388/3	AF00492	0	1	2	-1	0	0	oligo	-0.464364
NIO_UCSF_74388/4	AF00492	0	1	2	-1	0	0	oligo	-1.22139
NIO_UCSF_75335/3	AF01192	3	3	3	1	1	1	astro	3.27159
NIO_UCSF_75335/4	AF01200	3	3	3	1	1	1	astro	3.24343
NIO_UCSF_75335/5	AF00325	2	2	2	1	1	1	astro	0.851572
NIO_UCSF_75335/1	AF01228	0	0	0	0	1	1	astro	-1.60423
NIO_UCSF_75335/2	AF01219	2	2	2	-1	1	0	astro	2.53412
NIO_UCSF_7777/5	AF00313	3	3	3	-1	1	0	oligo	3.0969
NIO_UCSF_7777/6	AF01290	3	3	3	-1	1	0	oligo	3.36669
NIO_UCSF_7777/7	AF01274	2	2	2	-1	1	0	oligo	-1.17008
NIO_UCSF_7777/1	AF00743	0	0	0	-1	0	0	oligo	-1.174
NIO_UCSF_7777/2	AF00384	0	0	0	-1	0	0	oligo	-5.98817
NIO_UCSF_7777/3	AF00384	0	0	0	-1	0	0	oligo	-1.14956
NIO_UCSF_7777/4	AF00384	1	0	0	-1	0	0	oligo	-0.383842
NIO_UCSF_78641/3	AF00701	3	3	-1	-1	1	1	gbm	1.2756
NIO_UCSF_78641/4	AF00701	3	3	-1	-1	1	1	gbm	1.50941
NIO_UCSF_78641/5	AF01238	3	3	-1	-1	1	1	gbm	1.39142
NIO_UCSF_78641/6	AF01238	3	3	-1	-1	1	1	gbm	1.40596
NIO_UCSF_78641/7	AF01207	1	2	-1	-1	0	0	gbm	-1.94243
NIO_UCSF_78641/8	AF01207	0	2	-1	-1	0	0	gbm	-1.01378
NIO_UCSF_78641/1	AF01083	0	0	-1	-1	0	0	gbm	-1.59426
NIO_UCSF_82582/1	AF01102	2	2	-1	-1	1	0	astro	1.79224
NIO_UCSF_82582/2	AF01204	1	1	-1	-1	0	0	astro	-1.76913
NIO_UCSF_82582/3	AF01127	0	1	-1	-1	0	0	astro	-0.105843
NIO_UCSF_82582/4	AF00008	2	2	-1	-1	0	0	astro	-0.0967069
NIO_UCSF_82582/5	AF01237	0	1	-1	-1	0	0	astro	-1.60636
NIO_UCSF_82582/6	AF01239	0	0	-1	-1	-1	-1	astro	-1.47148
NIO_UCSF_83304/1	AF01234	3	3	3	-1	1	0	oligo	3.0222
NIO_UCSF_83304/2	AF01086	0	2	2	-1	1	1	oligo	-1.79041
NIO_UCSF_83304/3	AF01120	2	3	3	-1	1	0	oligo	0.605774
NIO_UCSF_83304/4	AF01123	3	3	3	-1	1	0	oligo	3.39404
NIO_UCSF_83304/5	AF01095	3	3	3	-1	1	0	oligo	2.01893
NIO_UCSF_84278/1	AF01106	3	3	3	-1	-1	-1	gbm	5.25743
NIO_UCSF_84278/2	AF01093	0	0	0	-1	1	1	gbm	-1.40277
NIO_UCSF_84278/3	AF01093	1	0	0	-1	1	1	gbm	-1.03922
NIO_UCSF_8662/1	AF00522	1	0	-1	-1	0	0	gbm	-0.708635
NIO_UCSF_8662/3	AF00522	0	0	-1	-1	0	0	gbm	1.53066
NIO_UCSF_8662/2	AF00372	1	0	-1	-1	0	0	gbm	-1.06854
NIO_UCSF_8662/4	AF00718	3	3	-1	-1	1	1	gbm	4.51961
NIO_UCSF_8662/5	AF00718	3	3	-1	-1	1	1	gbm	4.99136
NIO_UCSF_8662/6	AF00587	2	2	-1	-1	1	1	gbm	-0.566924
NIO_UCSF_8662/7	AF00587	2	2	-1	-1	1	1	gbm	-0.605571
NIO_UCSF_8662/8	AF00389	2	2	-1	-1	0	0	gbm	0.0893535
NIO_UCSF_8662/9	AF00358	2	2	-1	-1	0	0	gbm	-0.0376563
NIO_UCSF_8662/10	AF00358	1	2	-1	-1	0	0	gbm	-0.142445
NIO_UCSF_86745/3	AF01089	1	1	2	-1	1	1	gbm	-0.0579983
NIO_UCSF_86745/4	AF01089	1	1	2	-1	1	1	gbm	-0.665996
NIO_UCSF_86745/1	AF00161	2	2	2	-1	1	0	gbm	-0.855273
NIO_UCSF_86745/2	AF00161	2	2	2	-1	1	0	gbm	-0.138736
NIO_UCSF_86745/5	AF00929	3	3	3	-1	0	1	gbm	0.209006
NIO_UCSF_88550/1	AF00840	3	3	3	-1	1	1	astro	2.14078
NIO_UCSF_88550/2	AF00838	0	0	0	-1	0	0	astro	-1.82976
NIO_UCSF_88550/3	AF00838	0	0	0	-1	0	0	astro	-2.84008
NIO_UCSF_88550/4	AF01107	0	0	0	-1	0	0	astro	-1.95627
NIO_UCSF_88550/5	AF01107	0	0	0	-1	0	0	astro	-4.14045
NIO_UCSF_88550/6	AF01182	0	0	0	-1	0	0	astro	-3.52483
NIO_UCSF_88550/7	AF01175	0	1	2	-1	0	0	astro	-0.96869
NIO_UCSF_88550/8	AF01230	2	2	2	-1	0	0	astro	-1.66417
NIO_UCSF_88550/9	AF01216	0	1	0	-1	0	0	astro	-1.53519
NIO_UCSF_89882/1	AF00904	0	0	0	0	0	0	gbm	-2.47926
NIO_UCSF_89882/2	AF00045	3	3	3	1	1	1	gbm	2.57415
NIO_UCSF_89882/3	AF00045	3	3	3	1	1	1	gbm	4.73754
NIO_UCSF_89882/4	AF00160	2	3	3	1	1	1	gbm	1.5198
NIO_UCSF_89882/5	AF00160	2	3	3	1	1	1	gbm	1.88686
NIO_UCSF_89882/6	AF00915	3	3	3	1	1	1	gbm	5.58153
NIO_UCSF_89882/7	AF00830	2	2	2	0	1	1	gbm	2.11248
NIO_UCSF_90350/1	AF01094	3	3	-1	-1	0	0	gbm	1.44615
NIO_UCSF_90350/2	AF00890	0	0	-1	-1	1	1	gbm	-0.580642
NIO_UCSF_90350/3	AF01178	2	2	-1	-1	1	1	gbm	-0.602706
NIO_UCSF_90350/4	AF01087	1	3	-1	-1	1	1	gbm	-1.73426
NIO_UCSF_91565/2	AF01122	3	3	3	1	1	1	gbm	3.23977
NIO_UCSF_91565/3	AF01122	3	3	3	1	1	1	gbm	1.45535
NIO_UCSF_91565/6	AF01101	3	3	3	1	-1	-1	gbm	3.46707
NIO_UCSF_91565/7	AF01101	3	3	3	1	-1	-1	gbm	3.63552
NIO_UCSF_91565/8	AF01101	3	3	3	1	-1	-1	gbm	3.39051
NIO_UCSF_91565/9	AF01084	3	3	3	1	-1	-1	gbm	3.39702
NIO_UCSF_91565/10	AF01084	3	3	3	1	-1	-1	gbm	3.16519
NIO_UCSF_91565/11	AF01098	3	3	3	1	-1	0	gbm	4.19367
NIO_UCSF_91565/1	AF01227	2	2	2	-1	1	0	gbm	-0.937662
NIO_UCSF_91565/4	AF01129	3	3	3	1	1	1	gbm	1.79877
NIO_UCSF_91565/5	AF01129	3	3	3	1	1	1	gbm	3.45697
NIO_UCSF_91565/12	AF01205	2	2	2	0	0	0	gbm	-0.0960792
NIO_UCSF_92103/1	AF00869	2	2	2	-1	1	1	astro	-0.277539
NIO_UCSF_92103/2	AF00869	2	2	2	-1	1	1	astro	0.171009
NIO_UCSF_92103/3	AF00149	1	2	2	0	1	1	astro	-0.17337
NIO_UCSF_92103/4	AF00149	1	2	2	0	1	1	astro	0.284148
NIO_UCSF_92103/5	AF00920	3	3	3	1	1	1	astro	6.02368
NIO_UCSF_92103/6	AF00920	3	3	3	1	1	1	astro	6.07028
NIO_UCSF_92103/8	AF00858	0	2	2	-1	1	1	astro	-0.858166
NIO_UCSF_92103/9	AF00858	0	2	2	-1	1	1	astro	-0.74462
NIO_UCSF_92103/10	AF00885	3	3	3	-1	1	1	astro	6.13331
NIO_UCSF_92103/11	AF00885	3	3	3	-1	1	1	astro	7.57539
NIO_UCSF_93293/1	AF00922	3	3	-1	-1	1	1	gbm	1.10278
NIO_UCSF_93293/2	AF00922	3	3	-1	-1	1	1	gbm	3.2487
NIO_UCSF_93293/3	AF00922	3	3	-1	-1	1	1	gbm	2.29178
NIO_UCSF_941/2	AF00914	3	3	-1	-1	0	0	gbm	2.87169
NIO_UCSF_941/1	AF00914	3	3	-1	-1	0	0	gbm	3.41459
NIO_UCSF_95148/2	AF00826	0	0	0	0	1	0	oligo	-0.987048
NIO_UCSF_95148/3	AF00768	2	2	2	0	1	0	oligo	-0.124845
NIO_UCSF_95148/1	AF00907	3	3	3	-1	1	1	oligo	3.19571
NIO_UCSF_95148/4	AF00893	0	1	0	0	1	0	oligo	-0.817362
NIO_UCSF_95148/5	AF00831	3	2	2	-1	1	1	oligo	2.17258
NIO_UCSF_95148/6	AF00046	2	2	2	-1	1	1	oligo	0.107189
NIO_UCSF_9807/1	AF00726	0	0	-1	-1	0	0	other	-0.276136
NIO_UCSF_9807/2	AF00726	0	0	-1	-1	0	0	other	-0.474793
NIO_UCSF_9807/3	AF00762	2	2	-1	-1	1	1	other	2.71695
NIO_UCSF_9807/4	AF00762	2	2	-1	-1	1	1	other	2.85746
NIO_UCSF_99540/1	AF00900	0	2	2	-1	1	0	oligo	-1.88749
NIO_UCSF_99540/2	AF00900	2	2	2	-1	1	0	oligo	-1.88858
NIO_UCSF_99540/3	AF00900	2	2	2	-1	1	0	oligo	-1.60863
NIO_UCSF_99540/4	AF00851	2	2	-1	-1	1	0	oligo	-1.51565
NIO_UCSF_99540/5	AF00851	2	2	-1	-1	1	0	oligo	0.824267
NIO_UCSF_99540/6	AF00851	2	2	-1	-1	1	0	oligo	-1.0566
NIO_UCSF_99540/7	AF00901	0	2	-1	-1	0	0	oligo	-1.30905
NIO_UCSF_99540/8	AF00901	2	2	-1	-1	0	0	oligo	-0.820456
NIO_UCSF_99540/9	AF00901	1	2	-1	-1	0	0	oligo	-0.271704
